# Supplementary material for: P2X7 Receptor-Dependent microRNA Expression Profile in the Brain Following Status Epilepticus in Mice
Source: Front Mol Neurosci. 2020 Aug 12;13:127. doi: 10.3389/fnmol.2020.00127 (PMC7485385; doi:10.3389/fnmol.2020.00127)
Supplement: Supplementary file 2 [file Table_1.XLSX]

## Sheet: analysed miRNAs
microRNAs	Ct values												Fold change values												Average fold change
Target Name	WT ctrl 1	WT ctrl 2	WT ctrl 3	KO ctrl 1	KO ctrl 2	KO ctrl 3	WT post SE 1	WT post SE 2	WT post SE 3	KO post SE 1	KO post SE 2	KO post SE 3	WT ctrl 1	WT ctrl 2	WT ctrl 3	KO ctrl 1	KO ctrl 2	KO ctrl 3	WT post SE 1	WT post SE 2	WT post SE 3	KO post SE 1	KO post SE 2	KO post SE 3	WT ctrl	KO ctrl	WT post SE	KO post SE
dme-miR-7	18.9127	18.2035	17.8372	18.9959	18.5506	20.7766	19.1973	19.5898	18.2534	18.6102	18.6438	19.6247	0.775237	1.06689	1.20905	0.781318	1.06382	0.235407	0.652401	0.437935	1.19908	0.699274	0.882822	0.546659	1.01706	0.693514	0.763138	0.709585
hsa-let-7a	15.4518	15.188	15.2544	12.54	15.7797	16.2922	10.1067	15.1114	15.2006	15.438	15.8937	16.1462	1.05252	1.06378	0.893137	8.45695	0.895245	0.649694	43.857	1.20369	1.22686	0.777208	0.732309	0.751306	1.00315	3.33396	15.4292	0.753607
hsa-let-7b	14.803	14.1642	14.323	15.0686	14.6863	13.9955	15.1572	14.7693	14.505	14.9628	14.8283	14.9178	0.904151	1.18507	0.933286	0.802993	1.04668	1.749	0.725084	0.835974	1.0886	0.59193	0.839717	0.964488	1.0075	1.19956	0.883218	0.798712
hsa-let-7c	14.6031	13.7085	14.0912	14.9805	14.4511	15.7468	14.7251	14.6625	14.2866	14.5041	14.6441	15.632	0.846018	1.32394	0.892794	0.69536	1.0036	0.42321	0.796902	0.733336	1.03177	0.662688	0.777197	0.478928	1.02092	0.70739	0.854003	0.639605
hsa-let-7e*	24.7613	24.8165	25.3386	25.8052	25.9716	23.9108	24.752	25.9105	24.8118	25.5591	25.9094	26.097	1.35511	1.09791	0.672137	0.701724	0.625301	2.70074	1.39812	0.551891	1.28149	0.570106	0.577929	0.620191	1.04172	1.34259	1.07717	0.589408
hsa-let-7e	12.9281	12.9517	12.7753	13.9884	13.5335	16.4479	13.755	13.3179	12.8406	13.2107	13.2492	14.8221	1.13645	0.941134	0.934973	0.58181	0.797491	0.109514	0.656751	0.783448	1.18253	0.683307	0.859787	0.353189	1.00418	0.496272	0.874243	0.632094
hsa-let-7f	16.7583	16.9382	16.6553	17.7622	17.5019	15.5849	18.2141	17.0644	16.9269	17.7021	17.6903	17.083	1.19189	0.885663	0.947317	0.634531	0.759992	2.97123	0.445408	0.870725	1.0385	0.453176	0.590416	1.09925	1.00829	1.45525	0.784878	0.714281
hsa-let-7g	13.1274	13.4908	13.4919	13.5745	13.9882	14.5717	14.2695	13.7941	13.4707	11.9604	14.3907	14.2891	1.38529	0.906499	0.796331	1.08495	0.814469	0.562682	0.643472	0.788255	1.06943	2.27516	0.545444	0.715301	1.02937	0.8207	0.83372	1.17864
hsa-let-7i*	25.2425	23.9891	24.6209	24.9433	24.8857	24.2786	25.1664	24.2954	23.3566	23.6184	25.1603	23.8445	0.759212	1.52368	0.864457	0.99737	1.03806	1.63689	0.820444	1.32215	2.74805	1.71167	0.759624	2.31126	1.04912	1.22411	1.63021	1.59418
hsa-miR-101	24.1533	15.736	15.82	18.1329	16.4812	16.3368	15.4343	16.702	15.7286	15.6633	16.692	16.3191	0.0244175	7.02678	5.82831	1.6922	5.31687	6.08367	10.5476	3.85975	8.21729	6.4207	4.06702	6.43635	4.29317	4.36425	7.54155	5.64136
hsa-miR-103	15.3497	15.2998	14.8413	16.1206	15.8439	14.7202	16.2655	15.494	15.2376	15.7495	15.8856	15.8802	1.02918	0.896849	1.08341	0.643937	0.780093	1.75973	0.559177	0.841079	1.08936	0.570529	0.670917	0.823007	1.00314	1.06125	0.829873	0.688151
hsa-miR-106b*	19.4834	19.2933	18.7936	20.2873	19.7065	20.1927	19.5577	19.7567	19.2289	19.5188	20.0498	19.1622	0.95547	0.917589	1.1406	0.584324	0.873927	0.645933	0.93028	0.714084	1.11622	0.681856	0.609823	1.37888	1.00455	0.701395	0.920194	0.890185
hsa-miR-106b	15.75	15.4598	15.5115	16.7414	16.5948	15.5362	16.9583	20.8943	15.8505	15.91	16.6794	16.7094	1.03621	1.06668	0.904729	0.556489	0.61601	1.32829	0.459727	0.0264655	0.946538	0.678312	0.514269	0.61556	1.00254	0.833597	0.477577	0.602714
hsa-miR-107	17.6288	18.7425	18.5676	19.5106	19.3004	18.9337	19.7541	18.8155	18.7623	17.204	19.2311	19.6827	1.88136	0.731827	0.726308	0.545018	0.630529	0.841674	0.442019	0.74652	0.839804	1.84711	0.585644	0.523355	1.11316	0.672407	0.676115	0.985368
hsa-miR-10a	22.9844	22.913	24.1701	25.0223	23.8113	20.8214	25.2513	21.3296	22.2812	24.0128	24.5582	24.7142	1.51468	1.33973	0.492788	0.39381	0.911662	7.49796	0.322609	4.30796	2.41518	0.543115	0.480917	0.527514	1.11573	2.93448	2.34858	0.517182
hsa-miR-1197	26.5869	24.5087	25.4771	25.8002	25.6686	25.057	25.6377	24.4615	24.823	24.7576	26.0684	25.7777	0.560534	1.99261	0.895315	1.03243	1.13101	1.78913	1.10945	2.2092	1.86432	1.45694	0.758888	1.13454	1.14949	1.31752	1.72766	1.11679
hsa-miR-125a-3p	25.4777	23.037	22.802	15.5759	23.711	24.2173	25.069	23.5914	23.0483	23.3692	23.4812	23.7464	0.359014	1.64075	1.69764	366.695	1.30428	0.950673	0.488549	1.19882	1.89394	1.1324	1.35399	1.37699	1.23247	122.983	1.19377	1.28779
hsa-miR-125b-1*	23.215	23.5308	22.4388	23.8481	23.718	24.9994	24.0451	23.9684	22.8132	23.4456	23.996	22.8058	1.0527	0.711962	1.33426	0.724725	0.79309	0.33777	0.60701	0.564066	1.36212	0.656199	0.579051	1.61478	1.03297	0.618528	0.844399	0.95001
hsa-miR-127	12.7513	12.703	12.4359	13.1664	12.9756	13.9252	13.0754	12.4932	12.6098	12.7621	12.791	14.3805	1.07649	0.937047	0.991351	0.861989	0.983881	0.52738	0.881505	1.16283	1.16295	0.781459	0.98986	0.401994	1.00163	0.791083	1.0691	0.724438
hsa-miR-128a	14.8063	13.6932	13.8756	14.4657	13.8148	14.3919	14.9015	14.4224	13.8257	12.9119	14.4517	14.4627	0.730187	1.32952	1.03008	0.987155	1.55004	1.07563	0.700693	0.86059	1.41107	1.98538	0.882375	1.07022	1.02993	1.20427	0.990783	1.31266
hsa-miR-129	23.5124	19.8306	19.7793	18.3887	20.1675	20.2444	19.4207	20.2603	19.8092	19.7378	19.819	20.6149	0.211089	2.28044	2.07737	7.85747	2.28996	2.24761	3.68943	1.81658	2.69259	2.11293	2.58109	1.81688	1.52297	4.13168	2.73287	2.1703
hsa-miR-130b	21.4015	20.8298	20.8298	20.9326	21.8034	20.6553	22.3291	21.3943	21.1231	22.1628	21.568	22.3412	0.899019	1.12482	0.988887	1.32848	0.726477	1.66679	0.484521	0.816102	1.06789	0.387911	0.757112	0.541417	1.00424	1.24058	0.789505	0.562147
hsa-miR-133a	15.0735	16.1874	14.8112	16.2273	16.596	17.7005	17.1313	15.7634	15.589	15.9644	16.2902	15.8369	1.42546	0.554428	1.26532	0.684011	0.529738	0.255046	0.350965	0.798149	0.976577	0.562212	0.579698	0.969992	1.08174	0.489598	0.708563	0.703967
hsa-miR-135a	16.0587	15.7517	15.2582	16.71	15.9559	18.5582	17.1986	16.4948	15.7408	16.2773	16.7403	16.6731	0.906505	0.944079	1.16848	0.616265	1.03934	0.177184	0.421705	0.605216	1.10669	0.569788	0.534202	0.684003	1.00635	0.610928	0.711203	0.595998
hsa-miR-135b	20.3	15.7887	15.5595	16.9631	16.138	15.8128	14.6667	16.158	15.4933	12.4084	16.5305	15.8824	0.138083	2.65093	2.73188	1.48973	2.63918	3.42319	7.02603	2.2021	3.78487	23.983	1.77989	3.40898	1.8403	2.51737	4.33767	9.72396
hsa-miR-136*	14.7695	14.6092	14.856	15.7518	14.7265	14.7668	15.6398	15.9786	14.54	14.5863	15.7535	14.6107	1.15106	1.08282	0.802314	0.622048	1.26619	1.27467	0.645473	0.449716	1.32169	0.955866	0.550024	1.48431	1.01207	1.0543	0.805627	0.996733
hsa-miR-136	22.6265	18.3842	18.651	22.0227	19.1264	21.4879	20.962	21.9238	23.2667	19.0616	20.8883	21.1371	0.175348	2.7937	2.04137	0.28451	2.11815	0.426699	0.5698	0.257773	0.110183	1.51767	0.55288	0.568681	1.67014	0.943121	0.312585	0.879743
hsa-miR-139-5p	11.2969	11.6716	11.4089	11.9154	11.8409	12.68	12.1872	11.7449	11.6062	11.8212	12.0155	12.1506	1.31023	0.85064	0.897238	0.911134	0.959451	0.555225	0.724628	0.867529	1.03558	0.666291	0.752526	0.837525	1.01937	0.808604	0.875913	0.752114
hsa-miR-140-3p	18.8344	17.6417	16.8805	17.2666	17.8075	18.2795	17.9072	17.588	17.3055	17.3734	17.9679	16.8158	0.565924	1.08896	1.62267	1.79123	1.2312	0.918943	1.10316	1.21276	1.59931	1.13951	0.975253	2.64878	1.09252	1.31379	1.30507	1.58785
hsa-miR-142-3p	18.0776	17.4898	17.1451	17.9627	17.791	17.7966	16.4152	18.0603	17.5613	15.7826	18.1622	18.2659	0.824053	1.0426	1.16393	0.952769	1.07315	1.10671	2.674	0.753303	1.15425	2.95778	0.734483	0.835418	1.01019	1.04421	1.52718	1.50923
hsa-miR-145	17.1134	13.9768	13.1218	13.6767	14.1417	13.6556	11.3321	14.0069	13.6857	12.5316	14.0036	14.3488	0.225547	1.66976	2.65527	2.60757	1.88908	2.73928	12.7161	1.75469	2.37691	3.95033	1.84024	1.77052	1.51686	2.41198	5.6159	2.52036
hsa-miR-146b	14.9777	13.7963	12.9376	14.4779	14.3604	14.8007	14.9589	13.8881	13.4207	13.6788	14.4419	13.4224	0.556234	1.06193	1.69297	0.839724	0.911022	0.695074	0.57767	1.06926	1.60284	1.00098	0.762161	1.88833	1.10371	0.815273	1.08325	1.21716
hsa-miR-148a	18.3759	18.4696	17.7863	19.1233	18.6927	20.5582	19.3956	18.6849	18.1837	18.7732	18.8459	19.773	1.04412	0.823655	1.16279	0.664063	0.894997	0.254275	0.527927	0.761288	1.16826	0.579807	0.712485	0.45795	1.01019	0.604445	0.819159	0.583414
hsa-miR-148b	19.8091	19.9912	19.6433	21.1055	20.5839	21.781	20.8571	20.0694	19.8245	20.5063	20.5116	21.4383	1.17526	0.872023	0.975747	0.510908	0.733411	0.331162	0.582707	0.886339	1.13878	0.530161	0.682619	0.438878	1.00768	0.52516	0.869276	0.550553
hsa-miR-149	12.3488	12.0921	12.273	12.643	12.4035	11.7563	12.6349	12.5041	12.0577	12.2029	12.6242	12.0182	1.0843	1.09049	0.845721	0.944098	1.11457	1.80716	0.911558	0.87944	1.29934	0.877454	0.846726	1.57501	1.00684	1.28861	1.03011	1.09973
hsa-miR-150	25.8065	12.1764	11.7806	15.3211	12.8381	12.464	11.4953	12.037	12.0748	11.0134	12.5702	12.2345	0.00196525	20.9745	24.26	3.00791	16.8165	22.5632	40.9528	24.7891	26.1822	40.8065	17.9237	27.6453	15.0788	14.1292	30.6413	28.7918
hsa-miR-151-5P	10.2087	21.6803	20.4177	21.7566	21.2623	22.0089	22.0201	20.2252	20.886	21.1254	20.7903	21.223	175.389	0.0519909	0.109665	0.0625425	0.0880987	0.0543598	0.050024	0.152951	0.104897	0.0663602	0.108175	0.0979515	58.517	0.0683337	0.102624	0.0908289
hsa-miR-152	18.4627	17.2869	16.5796	17.3435	17.6665	17.674	18.1357	17.8364	16.8837	17.808	17.9261	17.7076	0.577525	1.09834	1.5765	1.33937	1.07073	1.10273	0.742606	0.805179	1.68977	0.664956	0.791786	1.12591	1.08412	1.17094	1.07918	0.860885
hsa-miR-154*	20.2475	20.8558	20.7191	20.9408	21.1441	20.385	20.5127	21.4525	20.2028	21.239	20.8276	20.7403	1.5027	0.829767	0.801995	0.992204	0.861785	1.51	1.28178	0.588746	1.518	0.552764	0.95005	1.23352	1.04482	1.12133	1.12951	0.912111
hsa-miR-154	23.3212	20.919	20.7218	22.5532	21.7951	23.729	22.2553	21.7938	21.7813	21.8151	21.7746	23.1576	0.368663	1.64054	1.65342	0.670264	1.13361	0.307153	0.791162	0.959879	1.04987	0.765861	1.01788	0.476986	1.22088	0.703674	0.933639	0.753576
hsa-miR-15a	17.6613	16.7324	16.8278	18.7766	17.373	17.7702	17.5503	17.6734	16.9667	13.9477	18.0093	18.2925	0.779223	1.24882	1.02763	0.384029	1.01601	0.798687	0.862682	0.697993	1.23513	7.47706	0.578659	0.581163	1.01856	0.732907	0.931935	2.87896
hsa-miR-15b	21.0762	17.6028	17.8976	11.0308	18.4575	18.3253	18.1521	17.578	17.8034	15.6738	18.4039	19.0414	0.251773	2.35415	1.68716	284.063	1.65113	1.8733	1.95906	2.56974	2.38321	7.78861	1.51697	1.19175	1.43103	95.8625	2.304	3.49911
hsa-miR-16	10.1993	10.9967	10.3382	11.7663	11.5073	11.7391	11.0797	10.9426	10.6481	10.7359	11.7846	10.6148	1.4536	0.704103	0.977055	0.523816	0.626844	0.552617	0.809477	0.784372	1.04304	0.732928	0.45785	1.25898	1.04492	0.567759	0.878962	0.816587
hsa-miR-17	14.0133	14.2333	13.5984	15.0309	14.8348	13.7897	15.74	14.6061	13.722	14.6842	14.8695	13.7897	1.11934	0.808968	1.10435	0.590282	0.676235	1.4446	0.34668	0.670352	1.34146	0.514194	0.584393	1.50964	1.01089	0.903704	0.786164	0.869409
hsa-miR-181a	14.6313	14.3927	14.7737	15.32	15.1495	17.0354	15.2091	15.0404	15.0031	14.7842	15.365	16.6383	1.1451	1.13733	0.767841	0.75854	0.853692	0.239126	0.7865	0.778959	0.866697	0.753305	0.650851	0.329083	1.01676	0.617119	0.810719	0.577746
hsa-miR-181c	17.8617	17.8371	18.3318	19.1547	18.7372	22.1297	19.0355	18.0784	17.9065	18.5714	18.7925	20.6774	1.29782	1.11128	0.693362	0.565485	0.755266	0.0744565	0.589682	1.00873	1.23208	0.580371	0.64343	0.212919	1.03416	0.465069	0.943498	0.478907
hsa-miR-184	21.0937	20.7763	20.4995	21.5988	21.1857	20.6805	21.7325	20.4395	20.3338	21.0011	20.9697	21.3463	0.948478	0.994958	1.05966	0.713556	0.950104	1.39607	0.624458	1.34823	1.57301	0.739717	0.976953	0.919667	1.00103	1.01991	1.1819	0.878779
hsa-miR-185	22.3151	18.1637	17.864	17.7123	18.6254	17.8999	18.0528	18.5249	17.8639	18.2442	18.7098	18.6641	0.160435	2.39998	2.59713	4.16222	2.21023	3.78345	3.15615	2.00475	3.4371	1.97203	1.84548	2.32801	1.71918	3.3853	2.866	2.04851
hsa-miR-186	13.4865	13.766	12.7211	13.8561	14.3826	13.7738	12.7456	13.8403	13.1583	13.6129	14.5829	12.7937	1.04656	0.7258	1.3165	0.864799	0.600373	0.94787	1.79295	0.739688	1.28672	0.701225	0.462601	1.954	1.02962	0.804347	1.27312	1.03927
hsa-miR-18a	22.9966	22.5061	21.9641	23.8579	23.4787	22.3544	23.8082	23.6183	22.7487	22.7748	23.335	23.8085	0.823561	0.973968	1.24669	0.483987	0.629484	1.42067	0.481	0.483429	0.957768	0.702422	0.615616	0.541904	1.01474	0.844715	0.640733	0.619981
hsa-miR-190	19.982	19.7856	19.3335	20.6641	20.3419	20.7897	20.719	20.473	19.7142	20.7854	20.7741	20.7693	0.96321	0.929111	1.11741	0.640985	0.801387	0.608256	0.592445	0.619058	1.13579	0.403675	0.525773	0.644689	1.00324	0.683543	0.78243	0.524712
hsa-miR-190b	24.2111	22.5385	21.4887	23.724	23.2743	24.1854	24.7325	23.542	22.7723	22.6889	23.6477	23.3648	0.424115	1.13819	2.07159	0.634679	0.866826	0.477221	0.302917	0.609167	1.12604	0.891011	0.592398	0.880831	1.2113	0.659576	0.679373	0.78808
hsa-miR-192	16.5114	16.764	15.9403	17.4386	17.4831	16.7943	17.5608	16.7501	15.8177	16.638	17.1242	17.4075	1.08778	0.768622	1.19604	0.610731	0.592202	0.988216	0.538768	0.832727	1.72311	0.728726	0.67233	0.675159	1.01748	0.730383	1.03153	0.692072
hsa-miR-194	17.6129	17.6834	17.2127	18.5637	18.5603	17.8008	18.7504	17.7783	17.4	17.7715	18.3401	18.1982	1.085	0.869793	1.05963	0.599296	0.6007	1.05276	0.505547	0.873842	1.23154	0.710926	0.619479	0.835308	1.00481	0.75092	0.870308	0.721904
hsa-miR-195	17.3926	13.7999	13.4949	14.555	14.2199	15.7064	14.7449	13.7354	13.5191	13.9317	14.3957	15.3829	0.207441	2.10673	2.28822	1.58326	1.99712	0.737871	1.33262	2.36399	2.97765	1.6707	1.56514	0.964982	1.53413	1.43942	2.22475	1.40027
hsa-miR-197	21.583	19.7005	20.1186	10.8288	18.9358	22.5655	18.4807	22.8334	21.9404	21.6105	18.6355	23.7764	0.540327	1.67716	1.10349	996.406	3.61407	0.302274	4.75674	0.205154	0.413052	0.387722	3.93964	0.136462	1.10699	333.441	1.79165	1.48794
hsa-miR-19a	17.4311	17.4877	17.0614	18.9383	18.3527	19.5185	18.7621	18.0963	17.7019	18.2071	18.4958	19.3111	1.08915	0.881583	1.04148	0.409098	0.61391	0.283282	0.443821	0.620375	0.884157	0.465215	0.492144	0.341821	1.00407	0.43543	0.649451	0.43306
hsa-miR-200a*	27.055	23.8176	25.567	23.4381	24.9209	25.8351	25.9985	22.7485	26.4681	25.3369	25.9187	25.1957	0.392954	3.11967	0.815736	5.14717	1.8416	1.01166	0.837782	7.02287	0.57803	0.945525	0.816376	1.64687	1.44279	2.66681	2.8129	1.13626
hsa-miR-200a	18.1507	18.3136	17.8213	18.9213	18.5655	17.6224	18.817	18.1148	17.7652	18.4903	18.4879	18.2779	1.12667	0.847162	1.0477	0.705105	0.902354	1.7961	0.727753	1.04334	1.44143	0.651199	0.842943	1.19163	1.00718	1.13452	1.07084	0.895257
hsa-miR-200b*	26.7834	23.64	25.5685	25.8372	23.935	26.2165	23.5376	21.8504	26.1058	22.0576	25.8594	25.7755	0.427738	3.18162	0.734808	0.879963	3.28915	0.700365	4.1593	11.8022	0.670029	8.27824	0.767074	0.993599	1.44806	1.62316	5.54384	3.3463
hsa-miR-200b	18.0953	17.8561	17.7823	19.5288	18.372	17.9362	19.4435	18.0925	17.1658	17.7798	19.0067	17.4533	1.03062	1.02402	0.947527	0.407368	0.908301	1.2719	0.414971	0.932712	1.92239	0.937999	0.517886	1.85773	1.00072	0.862524	1.09002	1.10454
hsa-miR-200b	18.744	18.8545	18.7289	19.932	19.1714	18.7217	19.916	18.2009	18.4105	18.8445	19.7166	18.7604	1.19694	0.933312	0.895159	0.560886	0.950256	1.34362	0.544545	1.57527	1.47709	0.816544	0.576497	1.36699	1.00847	0.951588	1.19897	0.920011
hsa-miR-200c	22.3073	19.3979	18.8278	21.2406	19.944	19.3658	19.4184	18.9197	22.4053	19.549	20.9636	20.1224	0.267562	1.69216	2.20868	0.598355	1.46992	2.27188	2.03166	2.52932	0.24483	1.324	0.641815	1.40536	1.38947	1.44672	1.60194	1.12372
hsa-miR-206	21.9088	20.7391	22.7489	22.7486	22.8362	21.498	23.433	23.3492	22.3294	23.1588	23.4519	22.0715	1.08501	2.05473	0.448548	0.647242	0.609088	1.59428	0.386685	0.361105	0.793889	0.333648	0.351892	1.11963	1.1961	0.950202	0.513893	0.601724
hsa-miR-20a	14.4805	14.1911	13.8274	15.2486	14.7276	13.9463	15.6065	14.84	14.1367	14.7715	14.7665	14.6014	0.941739	0.968841	1.09602	0.590395	0.847211	1.50742	0.442332	0.663024	1.17047	0.562957	0.73005	1.00041	1.0022	0.981676	0.75861	0.764474
hsa-miR-20b	21.6711	18.1017	18.1533	21.0359	19.1099	19.1789	21.8253	19.8177	18.3464	17.6773	19.348	19.109	0.227694	2.27537	1.93017	0.377575	1.43482	1.41595	0.209745	0.743176	2.23417	2.65314	1.07689	1.55322	1.47775	1.07612	1.06237	1.76109
hsa-miR-21	13.939	15.3289	15.3499	16.0833	15.8536	17.2145	16.2613	16.3599	15.1423	15.883	16.7752	16.3172	2.23635	0.718377	0.622455	0.540102	0.633317	0.255282	0.458375	0.377209	0.951152	0.425114	0.29598	0.496899	1.19239	0.476233	0.595579	0.405998
hsa-miR-213	20.7682	19.327	18.8512	19.8521	19.474	19.5561	17.6526	19.7256	19.4967	19.5132	19.396	19.8105	0.538934	1.23194	1.50617	1.08576	1.41111	1.38003	4.78829	1.00275	1.27416	0.940748	1.31856	1.20905	1.09235	1.2923	2.35506	1.15612
hsa-miR-214*	24.8704	24.7564	24.5285	25.2766	25.0318	24.0336	25.2285	24.6651	25.0941	24.2961	25.2456	23.9822	1.0538	0.960063	0.988418	0.849011	1.00603	2.0804	0.842839	1.09742	0.883786	1.14763	0.767915	2.25304	1.00076	1.31181	0.941349	1.38953
hsa-miR-216b	24.0934	24.1359	23.2428	24.366	25.8725	24.3926	26.2988	24.6093	24.157	24.0962	25.6573	23.7593	0.971458	0.794029	1.2964	0.858617	0.302201	0.872657	0.21592	0.613662	0.910343	0.709128	0.310552	1.41458	1.02063	0.677825	0.579975	0.81142
hsa-miR-218-2*	20.3162	20.3416	20.0336	20.9739	20.7769	24.7296	20.8752	20.6391	19.8767	20.0088	21.3542	19.6504	1.10329	0.912561	0.993228	0.7467	0.855939	0.0572297	0.767689	0.796736	1.46538	0.998595	0.507829	2.02189	1.00303	0.55329	1.00994	1.17611
hsa-miR-219	20.8536	17.5081	17.1292	18.2958	17.9952	18.9057	18.7904	17.9445	17.1247	14.6532	18.2903	18.7564	0.228609	1.95606	2.23627	1.43717	1.76998	0.974826	0.97937	1.551	2.96839	12.2953	1.27702	1.12989	1.47365	1.39399	1.83292	4.90075
hsa-miR-219-2-3p	22.7788	18.1598	17.9293	19.7736	18.7691	19.5834	18.8706	18.3329	17.9559	17.2489	18.8201	19.6902	0.131338	2.71697	2.80236	1.12592	2.2588	1.32987	2.02143	2.58552	3.64072	4.43829	1.93013	1.29059	1.88356	1.57153	2.74923	2.553
hsa-miR-22*	19.0664	19.459	19.5041	19.7606	19.5186	19.1205	19.4429	19.8801	19.0389	19.6519	19.6821	19.6911	1.41844	0.909597	0.775071	0.936017	1.10695	1.51013	1.12013	0.728943	1.41596	0.691359	0.874977	1.06265	1.03437	1.18436	1.08835	0.876327
hsa-miR-22	15.6111	15.7104	14.8242	16.1216	15.7953	15.9983	15.7227	15.9425	15.9567	15.4715	15.7497	15.7943	0.998846	0.784933	1.27547	0.748636	0.938661	0.844161	0.947713	0.717086	0.76988	0.804772	0.857601	1.01621	1.01975	0.843819	0.81156	0.89286
hsa-miR-221	13.7312	14.015	14.1168	12.5015	14.5603	14.7768	14.2994	14.1469	13.8391	13.7525	14.4363	15.6561	1.36674	0.945046	0.774215	3.42195	0.821344	0.731801	0.944952	0.925431	1.24198	0.984926	0.792351	0.415756	1.02867	1.65836	1.03745	0.731011
hsa-miR-223	14.4692	13.5657	11.7734	13.9709	12.7654	13.9273	14.6209	13.5625	14.7165	13.0407	14.1461	12.831	0.509729	0.80267	2.44413	0.768752	1.77279	0.820271	0.470358	0.863125	0.420564	1.00349	0.602689	1.8328	1.25217	1.1206	0.584682	1.14633
hsa-miR-223	16.4277	16.5831	14.5968	16.6274	15.773	15.8352	17.9412	15.9548	15.8657	15.7942	16.9031	15.118	0.795035	0.600906	2.09319	0.73911	1.33626	1.32507	0.28546	0.996667	1.14945	0.902027	0.540478	2.27651	1.16304	1.13348	0.810527	1.23967
hsa-miR-224	19.5294	23.8183	23.0889	25.7236	23.7097	24.7509	25.7797	24.2747	23.4088	23.4568	24.6937	24.779	7.17863	0.309145	0.450606	0.104676	0.422745	0.212669	0.096666	0.241756	0.477705	0.345085	0.189206	0.217966	2.64613	0.246696	0.272042	0.250753
hsa-miR-23b	18.581	18.3264	17.4648	19.0943	18.8058	20.6052	19.2645	18.7102	18.0346	18.4604	18.6821	19.5001	0.85303	0.85667	1.36843	0.638077	0.779327	0.231791	0.54446	0.70449	1.22007	0.678256	0.751651	0.521074	1.02604	0.549732	0.823008	0.650327
hsa-miR-25	20.2826	19.7813	20.0141	21.139	20.6643	22.058	21.2767	20.4479	20.2246	20.5686	21.1287	21.5236	0.980081	1.16784	0.873685	0.577947	0.803145	0.31643	0.504412	0.789396	0.999174	0.587914	0.515283	0.478976	1.0072	0.565841	0.764327	0.527391
hsa-miR-26a	26.9137	11.2884	10.8595	11.4951	11.6	11.4823	11.7262	11.1412	11.0061	13.36	11.5185	11.7614	0.000775661	33.0043	39.0623	36.2723	33.7284	37.8844	29.6723	39.2169	46.6955	6.82186	31.5928	32.6299	24.0224	35.9617	38.5282	23.6815
hsa-miR-26b*	23.6772	23.8944	22.8661	23.9297	23.6814	24.5105	24.8117	21.3784	22.3011	23.4161	23.5512	22.1144	1.02072	0.739169	1.32541	0.914833	1.08664	0.633195	0.476601	4.53636	2.59478	0.894663	1.0528	3.48326	1.02843	0.878221	2.53591	1.81024
hsa-miR-26b	15.2104	14.5762	14.0605	16.6966	14.6578	14.7506	15.5847	14.7835	14.0864	14.8585	14.9512	15.1488	0.775324	1.01301	1.27322	0.295482	1.21416	1.17866	0.613191	0.941476	1.65497	0.723726	0.877023	0.93467	1.02052	0.896101	1.06988	0.84514
hsa-miR-27a*	22.776	22.2396	21.0791	22.7597	21.8281	22.5459	21.8805	21.0107	21.3275	20.9773	21.6993	21.339	0.698875	0.853284	1.6769	0.754639	1.43942	0.906044	1.33271	2.14601	1.86804	1.77831	1.39324	2.18587	1.07635	1.03337	1.78225	1.78581
hsa-miR-27a	26.6613	17.3029	16.8596	20.9507	17.321	18.1502	17.5979	17.6369	16.9713	14.9241	17.8596	18.6659	0.013993	7.73202	9.24266	0.782391	9.68442	5.64296	7.67423	6.58165	11.3196	34.9391	5.90193	4.1247	5.66289	5.36992	8.52515	14.9886
hsa-miR-27b*	21.3206	21.1663	20.7681	21.9686	21.6341	21.7901	22.0981	22.5534	21.5426	20.8175	21.4043	21.4383	0.994445	0.931645	1.07937	0.67757	0.854371	0.79383	0.594704	0.382183	0.835026	1.0308	0.886913	1.05869	1.00182	0.775257	0.603971	0.992132
hsa-miR-27b	16.6488	16.4865	16.1045	17.2675	16.785	16.1675	17.3018	16.7582	16.209	16.721	17.0011	17.4176	0.994498	0.93684	1.07332	0.691483	0.966154	1.53449	0.648329	0.832692	1.32107	0.691828	0.736288	0.674221	1.00155	1.06404	0.934031	0.700779
hsa-miR-28	18.7893	19.1616	18.7064	19.9355	19.206	20.2221	19.816	19.4402	18.7989	19.3832	19.4897	20.7951	1.25184	0.814121	0.981211	0.603886	1.00127	0.512512	0.629858	0.720122	1.21783	0.606625	0.728117	0.360046	1.01572	0.705889	0.855936	0.564929
hsa-miR-296	17.3323	17.5489	17.1144	18.1628	18.4481	15.9407	18.2224	17.5614	17.5063	18.4566	17.7998	19.7196	1.17048	0.847994	1.00749	0.702767	0.57668	3.39457	0.647443	0.90201	1.01612	0.392705	0.800099	0.258441	1.00866	1.558	0.85519	0.483749
hsa-miR-299-5p	25.0833	24.7236	25.6905	25.8004	25.7932	25.4145	24.8109	23.8232	26.8175	24.7614	24.9776	26.6097	1.23978	1.33913	0.602328	0.80521	0.809256	1.08926	1.53502	2.68211	0.36495	1.13339	1.2608	0.497141	1.06041	0.901242	1.52736	0.963779
hsa-miR-29a*	18.7709	18.7074	18.5214	18.8281	18.7748	19.3096	18.6785	19.6615	19.6928	19.0357	18.9327	19.3873	1.08917	0.958149	0.958233	1.11773	1.15978	0.828765	1.19043	0.530674	0.563007	0.66304	0.920259	0.820683	1.00185	1.03542	0.761371	0.801327
hsa-miR-29b	15.7232	15.9477	15.3761	16.7744	16.4335	18.0365	16.7628	16.7474	15.6455	16.7167	16.5896	17.4291	1.13816	0.820015	1.07145	0.58641	0.742689	0.253108	0.567591	0.505453	1.17637	0.418089	0.590038	0.403003	1.00988	0.527402	0.749803	0.470377
hsa-miR-29b-2*	17.2829	21.4354	21.0949	22.3464	21.7541	21.8551	22.6229	21.942	21.6364	21.8099	21.8624	21.7013	7.37376	0.34904	0.38854	0.235435	0.354942	0.342618	0.186625	0.263613	0.353267	0.23393	0.291492	0.398338	2.70378	0.310998	0.267835	0.30792
hsa-miR-29c	10.732	11.179	10.8411	12.1708	11.7902	14.1264	12.1458	11.4613	10.9183	11.4992	11.8386	12.7833	1.33143	0.822152	0.913547	0.524349	0.682671	0.139947	0.512247	0.725416	1.14593	0.57214	0.584393	0.371043	1.02237	0.448989	0.794532	0.509192
hsa-miR-301	16.9637	15.7936	15.3247	15.527	16.2232	16.8026	16.7967	16.6509	15.7824	16.6456	16.6192	16.8077	0.611837	1.15897	1.41023	1.76829	1.09136	0.756151	0.704176	0.686432	1.35884	0.557879	0.734259	0.78747	1.06035	1.20527	0.916481	0.693203
hsa-miR-302b	26.6809	25.6167	24.6311	25.1318	26.4606	24.8159	26.8012	26.0552	26.8495	26.7598	26.446	25.9171	0.570197	1.00371	1.7473	1.78151	0.709263	2.29581	0.537752	0.794705	0.496836	0.39485	0.634221	1.11838	1.10707	1.59553	0.609765	0.715816
hsa-miR-30a-3p	13.7498	13.1056	13.0484	13.8259	13.4104	14.0208	13.7384	13.7087	14.3975	13.0541	13.801	13.6648	0.857997	1.12883	1.03249	0.869005	1.15903	0.78592	0.886487	0.797381	0.53633	1.0164	0.782637	1.05126	1.00644	0.937984	0.740066	0.950099
hsa-miR-30a-5p	21.6555	12.8055	12.6322	14.752	13.3173	13.6619	12.4357	13.013	12.7134	12.725	13.5634	13.8001	0.0188384	7.31755	7.25421	2.40788	6.50906	5.30677	11.5143	6.7999	9.07403	6.72265	4.8585	5.03918	4.86353	4.74124	9.12942	5.54011
hsa-miR-30b	10.0692	10.8627	10.6611	11.6866	11.3954	12.8429	11.8304	10.8157	10.8373	10.9014	11.4394	11.9382	1.61262	0.78317	0.791794	0.56114	0.68666	0.260649	0.487669	0.868171	0.927345	0.662478	0.589582	0.509966	1.06253	0.502816	0.761062	0.587342
hsa-miR-30c	17.1517	10.226	10.0975	12.1704	10.4961	10.7047	11.1067	10.4481	10.2823	14.29	11.5804	10.7639	0.0463147	4.73995	4.5552	1.56198	4.98535	4.46619	3.13476	4.36005	5.30343	0.246217	2.08133	4.47975	3.11382	3.67117	4.26608	2.2691
hsa-miR-30c-1*	24.5403	23.6525	25.5529	24.9876	22.9951	24.8482	24.6512	19.5224	25.1482	23.3236	22.6793	24.7019	1.20511	1.87714	0.442054	0.943639	3.75499	1.07606	1.144	35.2668	0.774435	2.04857	4.13753	1.24451	1.17477	1.9249	12.3951	2.47687
hsa-miR-30d*	20.0314	19.8406	19.5941	21.6405	20.4144	20.9908	21.8287	20.8567	20.5604	20.1253	20.735	20.5001	1.01272	0.973018	1.01483	0.354438	0.829122	0.575632	0.298676	0.516229	0.687367	0.694021	0.587744	0.845321	1.00019	0.586397	0.500757	0.709029
hsa-miR-30d	15.0273	15.1075	14.7766	16.4179	15.48	15.5122	15.7644	14.9786	14.7474	13.8887	15.3573	15.8534	1.12562	0.89634	0.991138	0.45839	0.87814	0.889047	0.692289	1.05164	1.33844	1.8126	0.846367	0.733427	1.00437	0.741859	1.02745	1.1308
hsa-miR-30e-3p	13.7234	12.9217	12.7708	13.6092	13.3702	13.8155	13.5034	13.5506	14.5562	12.9377	13.6038	13.6599	0.780694	1.14558	1.11813	0.902147	1.06472	0.809539	0.932119	0.794878	0.429251	0.984353	0.801644	0.942353	1.0148	0.925469	0.718749	0.90945
hsa-miR-32	26.7568	22.8567	25.1912	21.7716	23.4559	24.4248	24.7946	23.5119	23.4087	22.3936	23.3607	23.7189	0.331174	4.16206	0.725497	11.1994	3.48466	1.84309	1.32285	2.83576	3.30266	4.98489	3.2953	3.14192	1.73958	5.50905	2.48709	3.80737
hsa-miR-323-3p	16.2791	17.1453	16.8236	18.2849	17.8133	17.8238	18.2271	17.0702	16.9284	16.9053	17.6725	17.7615	1.622	0.749072	0.823047	0.431219	0.597922	0.614505	0.430933	0.846701	1.01281	0.768576	0.583567	0.670544	1.06471	0.547882	0.763481	0.674229
hsa-miR-324-3p	17.8231	16.1802	15.8572	15.7818	16.3707	16.5228	13.2039	16.5027	16.1433	16.4782	16.4296	16.2315	0.50861	1.33709	1.47046	2.23518	1.48602	1.3845	12.8131	1.14729	1.5958	0.944907	1.26289	1.77056	1.10539	1.7019	5.1854	1.32612
hsa-miR-324-5p	17.5756	16.7695	16.6152	17.8403	17.4839	17.604	17.7247	17.2289	16.7716	17.4376	17.3349	18.3462	0.778489	1.14579	1.12109	0.691846	0.885731	0.843706	0.719681	0.894203	1.33109	0.626512	0.86935	0.527107	1.01512	0.807094	0.981657	0.674323
hsa-miR-328	13.5822	13.385	13.6559	13.2445	13.6095	12.0555	13.7007	13.3889	13.759	13.839	13.0582	13.9881	1.13792	1.09818	0.800228	1.53538	1.19219	3.62385	1.07453	1.17519	0.985925	0.696548	1.54649	0.992098	1.01211	2.11714	1.07855	1.07838
hsa-miR-331-5p	23.1734	24.1774	22.2802	23.9789	24.1576	24.2547	24.9057	23.2164	22.7071	22.8597	23.8125	22.297	1.20122	0.504199	1.6511	0.733839	0.648318	0.627508	0.370613	1.05319	1.62539	1.09201	0.729036	2.5473	1.11884	0.669888	1.0164	1.45612
hsa-miR-335*	17.583	17.2388	16.7697	17.3809	17.7045	17.7325	16.7817	16.5418	16.3977	16.6431	16.9286	17.1836	0.896077	0.957623	1.16536	1.10061	0.879473	0.893	1.60087	1.66575	1.99582	1.25731	1.33311	1.36526	1.00635	0.957695	1.75414	1.31856
hsa-miR-335	16.4102	16.4698	16.2784	16.7599	16.7574	15.785	17.3002	17.0088	16.2687	16.7106	16.9105	16.8105	1.1515	0.930109	0.933687	0.9648	0.966435	1.9631	0.636983	0.686861	1.24391	0.683892	0.769396	1.0078	1.0051	1.29811	0.855917	0.820364
hsa-miR-338-3p	17.2999	18.3098	17.7724	19.7786	19.2164	19.8369	20.085	18.9555	17.7914	18.8972	20.0359	19.5508	1.64915	0.689383	0.879591	0.315891	0.466399	0.314064	0.245254	0.472813	1.14881	0.398643	0.233965	0.40021	1.07271	0.365451	0.622291	0.344273
hsa-miR-338-5P	16.6034	17.0359	17.6121	19.324	17.9116	19.012	18.6185	18.1728	17.5245	17.5754	18.6863	17.8515	1.63348	1.01891	0.60083	0.264585	0.704307	0.340051	0.414277	0.497152	0.844838	0.609063	0.364417	0.794374	1.08441	0.436314	0.585423	0.589285
hsa-miR-339-5p	16.4572	19.1824	18.6911	19.791	19.4172	19.8378	19.7528	19.3079	19.2366	19.8049	19.4588	20.7822	3.68235	0.46877	0.579315	0.389936	0.505243	0.390796	0.384428	0.461099	0.525262	0.264548	0.434571	0.212229	1.57681	0.428658	0.45693	0.303783
hsa-miR-340*	17.5623	17.6052	17.5985	18.1924	18.1702	17.3171	18.9591	17.9296	17.6627	17.8837	18.4681	18.2438	1.19248	0.974372	0.860642	0.822609	0.835351	1.56224	0.464233	0.834978	1.08934	0.697962	0.601542	0.858868	1.00917	1.0734	0.796184	0.719457
hsa-miR-340	17.7794	17.7718	17.5435	18.5873	18.3888	17.9771	18.6366	23.2668	17.7778	18.109	18.5611	18.1601	1.10679	0.936649	0.964623	0.674982	0.774534	1.0667	0.626315	0.0222845	1.08514	0.644134	0.608494	0.981971	1.00269	0.838739	0.577912	0.744866
hsa-miR-342-3p	12.447	12.8171	11.8434	12.9317	13.309	11.8228	13.6075	12.4913	12.2771	12.6631	13.136	11.7423	1.10939	0.72257	1.24749	0.846435	0.65166	1.88998	0.508735	0.97175	1.22224	0.698505	0.650377	2.08852	1.02648	1.12936	0.900909	1.1458
hsa-miR-34a	24.8108	17.0072	16.8399	15.6487	17.0304	17.4206	18.2389	17.6842	16.7628	15.753	17.4901	17.6751	0.0305941	5.75401	5.68057	18.713	7.18155	5.67264	2.9836	3.86163	7.92963	11.9252	4.6226	4.96964	3.82172	10.5224	4.92495	7.17249
hsa-miR-34c	17.152	16.9186	16.5569	19.7732	17.3214	20.7648	19.6231	18.6563	16.5576	17.3468	17.6042	18.568	0.966867	0.956873	1.08088	0.167782	0.917949	0.0873538	0.178763	0.307854	1.42971	0.617845	0.667932	0.418545	1.00154	0.391028	0.638775	0.568107
hsa-miR-361	18.7474	18.6411	18.2662	19.0237	18.9969	18.5947	19.3884	18.7467	18.4897	18.772	19.389	19.117	1.02225	0.926328	1.05603	0.901227	0.91809	1.25603	0.672029	0.923813	1.19695	0.735048	0.619349	0.913957	1.00154	1.02512	0.93093	0.756118
hsa-miR-365	13.636	17.5604	17.2042	18.2627	17.998	18.547	18.4239	17.9819	17.558	18.3049	18.2481	18.4959	6.61196	0.366592	0.41256	0.285766	0.343295	0.242921	0.245353	0.293687	0.427191	0.190116	0.255538	0.263025	2.4637	0.29066	0.322077	0.236226
hsa-miR-369-3p	20.7553	20.998	20.4779	22.1505	21.1818	23.9947	21.9314	21.5404	20.7673	21.5488	21.5406	22.4673	1.1615	0.826359	1.04186	0.471497	0.922737	0.135945	0.526955	0.60884	1.12814	0.490134	0.636996	0.409546	1.00991	0.51006	0.754646	0.512225
hsa-miR-369-5p	21.0199	20.7757	20.9189	21.5712	21.6142	20.8019	21.8421	20.8291	20.806	20.8261	21.8068	21.8395	1.08112	1.07794	0.85809	0.787672	0.764539	1.38987	0.626786	1.11455	1.22802	0.904385	0.592215	0.707552	1.00572	0.980692	0.989785	0.734717
hsa-miR-375	16.9435	18.6438	17.8219	19.1997	18.8169	18.7074	19.8868	19.2199	18.7686	16.456	18.9616	19.464	2.12459	0.550331	0.855267	0.474813	0.619086	0.691456	0.283142	0.396103	0.587225	2.17846	0.495733	0.427708	1.17673	0.595118	0.422157	1.03397
hsa-miR-376a*	19.0542	17.3918	17.7206	18.5045	18.2425	18.7508	18.6892	18.763	18.6242	18.404	19.1467	18.6894	0.585982	1.56139	1.09296	0.915816	1.09818	0.799279	0.773631	0.647648	0.773166	0.672594	0.519432	0.871619	1.08011	0.937759	0.731482	0.687882
hsa-miR-378	21.8212	21.2211	21.287	21.1499	20.9615	21.4939	20.7689	21.6543	22.7535	21.231	20.9462	22.2484	0.900917	1.14961	0.965525	1.5318	1.74557	1.24944	1.91537	0.913585	0.462353	0.991968	1.5617	0.77399	1.00535	1.50894	1.0971	1.10922
hsa-miR-381	22.4404	21.7487	20.8216	21.5566	21.364	22.4549	21.8209	22.0395	21.3688	21.7747	22.205	22.8312	0.686561	0.93345	1.56038	1.35256	1.54569	0.751233	1.08124	0.818748	1.4131	0.796525	0.763895	0.604856	1.06013	1.21649	1.10436	0.721759
hsa-miR-382	18.3953	13.6687	14.0861	14.1233	14.2525	14.0035	14.265	14.3133	13.8231	11.7539	14.5911	14.8246	0.145155	3.23503	2.12956	2.99421	2.7377	3.36808	2.60587	2.22041	3.38185	10.5982	1.91649	1.99227	1.83658	3.03333	2.73604	4.83566
hsa-miR-409-3p	14.6896	14.6524	14.3438	15.368	15.3441	15.6355	15.6434	14.7743	14.4826	14.4853	17.3759	15.1178	1.07167	0.925748	1.00797	0.714991	0.726903	0.614923	0.5672	0.912804	1.21149	0.903074	0.157374	0.920054	1.00179	0.685606	0.897164	0.660167
hsa-miR-409-5p	17.8103	19.6155	19.5679	24.0382	20.5218	20.264	20.9648	20.5499	19.8346	14.5962	20.529	20.9048	2.66695	0.642386	0.583699	0.0379893	0.434729	0.538101	0.307027	0.360673	0.642072	18.1003	0.382915	0.360654	1.29768	0.33694	0.436591	6.28129
hsa-miR-411*	20.8389	19.9548	19.8043	20.7546	20.5685	20.719	20.6061	20.2356	20.8251	19.9911	20.8241	20.1281	0.751592	1.16769	1.13944	0.850722	0.96783	0.902723	0.905342	1.03129	0.743114	0.989291	0.717672	1.42097	1.01957	0.907092	0.893248	1.04265
hsa-miR-411	14.0545	13.736	13.1843	14.6378	14.5521	13.95	14.647	13.6757	13.26	13.0906	14.1006	14.7348	0.889671	0.933933	1.20352	0.633959	0.672794	1.05725	0.604835	1.04487	1.51118	1.26922	0.814442	0.641291	1.00904	0.788	1.05363	0.908318
hsa-miR-412	22.8002	21.5103	20.7415	22.9163	20.6824	23.2302	21.4984	21.8304	22.6844	20.5681	21.7943	22.0401	0.540109	1.11175	1.66537	0.532091	2.50295	0.443133	1.365	0.955497	0.573169	1.85602	1.02519	1.05664	1.10574	1.15939	0.964554	1.31262
hsa-miR-421	17.2395	16.7285	16.2199	17.5305	16.9034	17.5058	17.4482	16.8284	16.7795	16.2908	17.3964	16.435	0.822108	0.986183	1.23343	0.717383	1.10803	0.755533	0.729226	0.98741	1.1075	1.1605	0.696918	1.65857	1.01391	0.860314	0.941379	1.172
hsa-miR-423-3P	18.8719	19.5092	19.1971	19.9613	19.6418	19.9775	20.2393	19.5701	19.7601	19.2989	19.8007	19.5904	1.46243	0.7915	0.863919	0.733826	0.915725	0.751189	0.581094	0.814192	0.77387	0.795615	0.726076	1.02664	1.03928	0.800246	0.723052	0.849443
hsa-miR-423-5p	13.6413	22.4592	22.8185	24.088	21.7037	23.4424	21.7961	19.8316	21.9733	22.1523	19.9483	23.5194	74.8505	0.139622	0.0956865	0.0572623	0.298953	0.0927361	0.269246	0.925844	0.227488	0.150068	0.89352	0.0918837	25.0286	0.14965	0.474193	0.378491
hsa-miR-425	20.5706	20.3003	19.0382	20.8392	20.4612	20.8884	20.7915	19.9626	20.1233	19.8511	20.4397	19.4625	0.772002	0.783792	1.65265	0.684247	0.88916	0.684605	0.67905	1.06283	1.03088	0.92971	0.798993	1.92227	1.06948	0.752671	0.924256	1.21699
hsa-miR-425-5p	12.9137	16.1801	15.5249	16.7878	16.3134	18.9185	17.3282	16.2447	16.3555	16.1205	17.0891	17.2743	4.55293	0.398302	0.551438	0.331507	0.460582	0.0783681	0.218851	0.408661	0.410323	0.360636	0.238154	0.255992	1.83422	0.290152	0.345945	0.284928
hsa-miR-431*	16.5414	24.2413	20.6013	26.5618	24.1596	25.0151	26.5475	23.518	25.2305	23.3444	21.7491	24.7001	17.7227	0.0717516	0.786393	0.0182182	0.0963056	0.0551012	0.0176663	0.127109	0.0420507	0.116081	0.45327	0.0716384	6.1936	0.0565417	0.0622754	0.213663
hsa-miR-431	15.2142	16.7374	16.1789	16.9515	16.9497	17.8438	16.9318	16.4294	16.1353	16.3815	16.5488	16.5987	2.08039	0.609301	0.788904	0.666222	0.667042	0.371584	0.648456	0.809398	1.07598	0.677489	0.779647	0.920487	1.15953	0.568283	0.844611	0.792541
hsa-miR-433	22.6959	16.8039	16.8085	17.6104	17.5208	16.7746	17.434	16.7729	16.8372	15.1634	17.3659	17.4454	0.0770078	3.84948	3.37337	2.79163	2.97036	5.15811	3.02893	4.22023	4.37631	10.4277	2.92756	3.38617	2.43328	3.64003	3.87516	5.58048
hsa-miR-448	21.4468	18.6688	17.94	24.4252	18.5344	19.7105	24.1116	20.6196	17.7983	17.5605	18.8061	18.9062	0.274073	1.58248	2.30566	0.0371291	2.2031	1.0093	0.0443048	0.439218	3.36598	2.96411	1.61545	1.84199	1.3874	1.08318	1.28317	2.14052
hsa-miR-455	21.1885	21.1799	20.6908	22.4248	21.6667	21.8265	21.9751	21.6943	21.2618	21.5503	21.9978	21.6632	1.04161	0.882052	1.08843	0.47203	0.798359	0.739839	0.618993	0.662615	0.969568	0.592839	0.561801	0.865844	1.00403	0.670076	0.750392	0.673495
hsa-miR-484	11.8492	11.814	11.3405	12.6527	12.4433	13.4253	12.7765	11.8245	11.4896	11.8253	12.6703	11.8196	1.0326	0.890718	1.08724	0.631675	0.730344	0.38279	0.556618	0.948758	1.29749	0.767829	0.552375	1.21751	1.00352	0.581603	0.934288	0.845905
hsa-miR-485-5p	11.4207	18.0148	19.8153	17.9373	17.9759	18.1103	17.9695	17.9719	17.7065	18.1291	17.6751	17.7121	37.37	0.325625	0.0821787	0.435766	0.424266	0.400157	0.409178	0.35992	0.469072	0.261361	0.462659	0.551125	12.5926	0.420063	0.412723	0.425049
hsa-miR-486	15.2577	15.6816	16.2631	16.8234	16.5701	15.2373	17.5563	16.8822	16.6952	17.6734	16.9839	16.0574	1.62899	1.0222	0.600544	0.58756	0.700329	1.82614	0.339426	0.477217	0.589002	0.223292	0.465342	1.08101	1.08391	1.03801	0.468548	0.589881
hsa-miR-487b	14.974	14.8023	14.1825	15.6745	15.6653	14.9151	15.2122	14.9706	14.7536	13.2045	15.5881	15.7406	0.93724	0.888686	1.20061	0.61576	0.619721	1.07914	0.814585	0.84855	1.06943	2.33709	0.578764	0.636393	1.00884	0.771539	0.910856	1.18408
hsa-miR-490	21.607	21.4424	22.3522	21.4086	19.608	22.8652	21.5414	22.4252	22.1157	22.3719	23.8542	23.2389	1.33897	1.26333	0.59117	1.64028	5.7141	0.618714	1.43643	0.685913	0.921655	0.576285	0.266545	0.499031	1.06449	2.6577	1.01467	0.447287
hsa-miR-493-3p	13.2289	20.9916	21.1582	24.22	21.9956	23.8112	23.1511	21.4558	22.9757	22.647	20.6946	22.8978	43.9634	0.170415	0.133475	0.0230614	0.107767	0.0316942	0.0464515	0.132546	0.0501155	0.0470016	0.235072	0.0623879	14.7558	0.0541744	0.0763709	0.114821
hsa-miR-494	20.5999	20.6675	20.4706	21.8627	21.4264	20.2569	21.269	20.0882	20.1355	20.1459	21.4059	20.9129	1.15433	0.927182	0.934337	0.513582	0.694931	1.61827	0.744183	1.48652	1.55975	1.15644	0.624001	1.07331	1.00528	0.94226	1.26348	0.951252
hsa-miR-532	15.6959	15.2759	15.0324	15.9251	15.7323	15.5812	16.3061	15.6249	14.9186	15.2378	16.003	15.7735	0.911542	1.02667	1.06855	0.830271	0.949	1.09089	0.612138	0.864895	1.53008	0.915853	0.696332	0.997799	1.00225	0.95672	1.00237	0.869995
hsa-miR-532-3p	19.8905	16.8614	16.2822	17.2431	17.4289	16.7899	17.6074	16.6423	16.5355	16.549	17.1009	17.1867	0.25263	1.73598	2.28019	1.68996	1.48573	2.39523	1.26047	2.16828	2.5316	1.87303	1.65098	1.90127	1.42293	1.85697	1.98678	1.80843
hsa-miR-543	19.6227	17.7301	18.0054	17.8962	18.1151	17.745	18.4124	18.0181	17.9964	18.2033	18.1968	18.5659	0.520358	1.62648	1.18154	1.83848	1.5797	2.11371	1.23426	1.4294	1.57333	1.018	1.32144	1.25047	1.10946	1.84396	1.41233	1.19664
hsa-miR-551b	20.7906	20.1321	19.9853	21.2771	20.8065	19.74	21.3438	21.2917	20.1687	21.0473	20.6707	20.9709	0.834897	1.10932	1.07972	0.636216	0.881617	1.91151	0.583262	0.532842	1.25833	0.511094	0.857498	0.851132	1.00798	1.14311	0.791478	0.739908
hsa-miR-574-3p	20.2153	16.2632	15.3366	16.5366	16.7428	17.8122	16.8708	15.8286	15.8649	16.3092	16.5168	16.6136	0.152191	1.98288	3.3137	2.08085	1.80368	0.889776	1.58469	2.87566	3.04048	1.66876	1.86742	2.13423	1.81626	1.59143	2.50028	1.89014
hsa-miR-652	15.4138	15.7344	15.2589	16.0564	15.8061	15.2941	16.4412	15.5611	15.3858	15.5477	15.7475	15.5701	1.21658	0.820016	1.00239	0.832013	0.989656	1.46106	0.611824	0.992198	1.21483	0.810915	0.912394	1.26099	1.013	1.09424	0.939618	0.994768
hsa-miR-671-3p	22.3882	20.4756	20.8577	17.7298	20.8478	21.1337	21.7562	20.6029	21.4624	19.8336	21.1861	22.298	0.528457	1.67486	1.12983	14.2485	1.6412	1.39362	0.839564	1.6453	0.983207	2.27073	1.14915	0.649857	1.11105	5.7611	1.15602	1.35658
hsa-miR-671-5P	24.568	24.4198	23.7677	24.4472	24.5289	24.5196	24.2817	23.8289	24.3721	24.7811	24.4499	24.7729	0.94047	0.877302	1.21201	1.09179	1.03168	1.07495	1.17565	1.41782	1.05496	0.593364	0.964682	0.942524	1.00993	1.06614	1.21614	0.833523
hsa-miR-672	16.2203	19.4441	19.4628	19.899	20.2319	20.0914	20.0125	19.6102	20.1671	19.6206	20.0362	20.0351	5.21622	0.470012	0.407882	0.434916	0.345305	0.394024	0.385993	0.449496	0.331284	0.361356	0.350091	0.428186	2.03137	0.391415	0.388924	0.379878
hsa-miR-744*	20.5036	18.8079	18.6695	19.8281	19.2346	19.7564	19.449	19.5421	19.4552	18.7304	19.5884	18.7971	0.517975	1.41247	1.36682	0.8833	1.33277	0.961019	1.103	0.91108	1.0492	1.29493	0.923241	1.95286	1.09909	1.05903	1.02109	1.39034
hsa-miR-758	20.0973	21.4169	21.0229	22.2922	21.5493	21.9246	23.2039	21.3085	21.3544	21.7092	21.5039	22.2957	1.96694	0.663386	0.766378	0.458682	0.767597	0.612658	0.234099	0.767386	0.805959	0.470676	0.701252	0.495067	1.13223	0.612979	0.602481	0.555665
hsa-miR-872	17.0611	16.9969	15.1379	16.2627	17.5738	16.3549	17.8104	16.4511	16.2848	17.8601	17.3796	16.3127	0.739744	0.65106	2.07634	1.37358	0.553567	1.33398	0.451106	1.0198	1.24079	0.310966	0.560652	1.43545	1.15571	1.08704	0.903901	0.769023
hsa-miR-92	15.8679	16.0782	15.7447	16.3666	16.5195	15.2885	16.4775	16.2183	16.0845	16.6218	16.1732	16.7366	1.19468	0.869259	0.96294	0.902715	0.811967	1.97303	0.802616	0.846393	1.00691	0.518143	0.913766	0.755756	1.00896	1.22924	0.885308	0.729222
hsa-miR-93*	16.7544	16.0888	15.3281	17.3156	16.8757	16.7634	16.0565	16.0887	15.8191	16.0892	16.5986	15.5472	0.722093	0.964234	1.43623	0.522535	0.708818	0.793165	1.20074	1.03469	1.3524	0.837541	0.760312	1.9259	1.04085	0.674839	1.19594	1.17458
hsa-miR-935	16.8084	16.1363	15.4952	16.3538	15.8123	16.1329	16.3066	15.8337	17.595	16.2429	16.4125	16.7197	0.740097	0.992708	1.3611	1.08291	1.57615	1.3065	1.07431	1.31375	0.420175	0.801049	0.92036	0.909104	1.0313	1.32185	0.936078	0.876838
hsa-miR-98	16.4497	17.2903	17.2931	19.1309	18.5131	24.2538	18.8461	17.9476	17.4789	18.3519	18.5586	20.1148	1.72781	0.812153	0.712633	0.28761	0.441331	0.0085448	0.336406	0.552569	0.829074	0.338079	0.378581	0.157328	1.0842	0.245829	0.572683	0.291329
hsa-miR-99a	25.7424	13.5804	13.6711	16.823	13.7762	14.0872	14.3133	13.6818	13.6397	13.4861	14.13	14.5242	0.00433365	16.7181	13.8026	2.2403	18.5129	15.449	12.2498	16.7212	18.6661	15.5065	12.8245	11.9264	10.175	12.0674	15.8791	13.4191
hsa-miR-99b*	20.8233	19.9188	20.2307	21.1241	20.529	20.7257	20.8391	21.0734	19.8184	20.3162	21.3282	20.174	0.828479	1.3055	0.924572	0.718066	1.08471	0.979809	0.840021	0.629219	1.62817	0.861109	0.5518	1.50093	1.01952	0.927528	1.03247	0.971281
hsa-miR-99b	13.5295	14.4469	14.4408	14.2926	14.7364	14.7251	15.1188	14.5984	14.3642	14.5738	14.7168	15.6258	1.7865	0.796257	0.702981	1.12392	0.826279	0.862103	0.608611	0.769176	0.980974	0.633556	0.741438	0.482577	1.09525	0.937435	0.786254	0.61919
mmu-let-7a*	20.0743	19.7762	19.3455	19.8454	19.712	19.6195	19.8404	20.613	19.7609	20.1117	19.5118	19.938	0.923554	0.955902	1.13273	1.1556	1.26756	1.3991	1.11339	0.574271	1.12394	0.658187	1.28915	1.1725	1.00406	1.27409	0.937201	1.03995
mmu-let-7c-1*	21.9286	22.3343	21.712	22.8018	22.6679	22.7374	23.337	22.3553	21.8679	22.7707	22.3944	22.3438	1.22317	0.777244	1.05185	0.712942	0.78227	0.771765	0.472358	0.821934	1.24936	0.499038	0.837063	1.0595	1.01742	0.755659	0.847885	0.798534
mmu-let-7d*	20.6292	21.7734	20.1088	20.7326	21.1822	19.9589	21.058	20.5076	20.9124	21.8718	21.1777	20.4309	1.35242	0.515078	1.43554	1.34401	0.984168	2.37891	1.0299	1.32901	1.08843	0.418007	0.873968	1.79233	1.10101	1.56903	1.14911	1.0281
mmu-let-7g*	22.1619	22.1983	21.924	22.7708	22.647	21.8298	22.7122	22.6221	21.8055	22.2516	22.7123	21.976	1.1176	0.917357	0.975384	0.782376	0.852472	1.555	0.782345	0.733752	1.40119	0.768109	0.721258	1.46845	1.00345	1.06328	0.972429	0.985939
mmu-miR-101b	15.3488	15.7044	15.3708	16.4839	16.1507	15.6194	16.3668	16.5432	15.1958	15.7659	16.5961	15.2043	1.27762	0.840531	0.931206	0.62106	0.782432	1.17062	0.646743	0.504267	1.39125	0.69981	0.508644	1.63127	1.01645	0.858038	0.847419	0.946576
mmu-miR-106a	17.7488	14.4074	13.8046	15.5908	15.0846	15.4348	15.2248	14.7896	14.0218	14.7692	15.3547	14.6732	0.217486	1.85577	2.47768	1.03636	1.47187	1.19541	1.2824	1.52776	2.82044	1.25465	1.08054	2.11795	1.51698	1.23454	1.87687	1.48438
mmu-miR-1188	19.9816	22.85	16.9024	22.2558	22.8309	19.8834	26.629	24.2432	23.4214	21.332	20.8208	24.9276	1.11518	0.128558	6.97518	0.246139	0.165219	1.31946	0.011404	0.0525158	0.100646	0.319873	0.589136	0.0417926	2.73964	0.57694	0.0548551	0.316934
mmu-miR-1191	22.1713	21.2514	21.0636	22.8402	22.4168	22.6794	22.6766	22.6437	22.0584	21.7558	21.8848	22.3161	0.732919	1.1673	1.16886	0.492165	0.660063	0.569615	0.529308	0.477134	0.776199	0.714949	0.844867	0.765738	1.02303	0.573948	0.594214	0.775185
mmu-miR-1193	23.5343	22.1643	22.7701	23.2525	23.135	22.9952	22.8167	21.8683	22.7323	22.605	22.2422	23.0242	0.715069	1.55586	0.898836	0.928188	1.00694	1.14847	1.20547	2.04963	1.221	0.996006	1.65514	1.17636	1.05659	1.02787	1.49203	1.27584
mmu-miR-1198	18.361	18.2845	17.8579	18.5038	18.2911	18.3942	18.4679	18.4669	18.0745	18.1012	18.3915	17.9574	1.02412	0.909026	1.07417	0.990385	1.14768	1.10619	0.97487	0.859565	1.22333	0.896827	0.947666	1.56482	1.00244	1.08142	1.01925	1.13644
mmu-miR-125b*	15.9106	19.7855	18.8365	20.5089	19.5975	20.0223	20.9846	20.3953	19.2827	19.5178	20.5166	19.3747	5.6354	0.32335	0.548785	0.248377	0.467187	0.360282	0.171492	0.227341	0.533021	0.338218	0.218705	0.589847	2.16918	0.358616	0.310618	0.382257
mmu-miR-1274A	12.585	12.4432	12.1432	12.7505	12.5123	13.1845	13.1582	13.4829	13.6939	12.7968	13.5746	13.2063	1.02316	0.950243	1.02854	0.974032	1.14888	0.74638	0.704965	0.495973	0.464588	0.646154	0.487036	0.768318	1.00065	0.95643	0.555175	0.633836
mmu-miR-129-3p	17.778	14.9947	14.8301	10.5012	15.3781	14.5934	12.9798	14.7521	14.806	12.4456	14.8743	15.7902	0.311477	1.80502	1.77865	51.5702	1.7551	3.13011	8.88382	2.29151	2.39345	9.17865	2.20299	1.42704	1.29838	18.8185	4.52293	4.26956
mmu-miR-1306	17.4703	21.839	21.9262	22.7276	22.0884	22.5887	22.4903	22.3239	22.0935	21.699	22.5091	22.618	8.99486	0.366509	0.303334	0.251082	0.391069	0.286221	0.284176	0.28102	0.357441	0.350886	0.258617	0.293089	3.22157	0.309457	0.307546	0.300864
mmu-miR-130b*	25.0579	22.9114	21.8272	24.2103	23.3835	23.1706	24.0483	22.4381	23.2896	23.0609	22.9561	23.0611	0.338019	1.25981	2.3483	0.649415	1.15188	1.38219	0.697635	1.8767	1.12769	0.986845	1.37136	1.55837	1.31538	1.06116	1.23401	1.30553
mmu-miR-134	18.2099	17.507	16.9928	17.6741	18.0443	17.9691	17.6488	17.4167	17.0375	17.2032	17.7173	17.0337	0.751361	1.02956	1.2927	1.16301	0.899804	0.981357	1.13641	1.17612	1.65848	1.10418	0.999196	1.96135	1.02454	1.01472	1.32367	1.35491
mmu-miR-136	14.7239	14.7923	14.5933	14.8389	14.7773	15.2088	16.28	15.2053	14.7964	14.539	15.8768	14.9962	1.15413	0.926609	0.935079	1.13788	1.1875	0.911541	0.402358	0.746706	1.07495	0.959566	0.490579	1.10394	1.00527	1.07897	0.741339	0.85136
mmu-miR-137	17.9125	14.285	13.7102	15.4474	14.7541	14.3895	13.5679	14.7712	14.2396	13.6718	14.8916	15.1329	0.191797	1.99545	2.61287	1.13066	1.82835	2.4369	3.99455	1.52851	2.39561	2.6519	1.4714	1.52128	1.60004	1.79864	2.63956	1.88153
mmu-miR-138*	17.2953	17.2897	16.8008	18.1355	17.5603	17.4157	17.996	17.5478	17.2225	16.6189	17.7468	16.924	1.04313	0.881482	1.08754	0.62208	0.926799	1.06064	0.657898	0.790884	1.07445	1.21924	0.720965	1.55856	1.00405	0.869841	0.841079	1.16626
mmu-miR-139-3p	16.8045	18.4422	17.0994	18.3831	18.3947	19.2572	18.1771	17.5853	17.7881	17.9019	19.4578	18.4981	1.82988	0.495061	1.10387	0.654132	0.648872	0.369478	0.724449	0.96207	0.906316	0.625505	0.274928	0.653464	1.14294	0.557494	0.864278	0.517966
mmu-miR-140	13.7217	13.8243	13.4365	14.4618	14.7146	15.3924	15.256	14.7353	13.7276	13.8148	14.7033	14.8093	1.1225	0.880063	1.01227	0.717508	0.602182	0.389699	0.397281	0.502202	1.0948	0.769671	0.537258	0.61011	1.00495	0.569796	0.66476	0.639013
mmu-miR-146b*	24.2261	24.493	23.8061	24.082	23.7389	25.2601	23.789	24.0975	23.9326	23.3672	23.6744	24.4841	1.13017	0.790709	1.11902	1.33345	1.6914	0.610044	1.56856	1.116	1.3566	1.49914	1.56582	1.09173	1.0133	1.21163	1.34705	1.38556
mmu-miR-151	22.2719	18.5263	17.9422	18.4364	19.0491	18.537	13.0271	18.0685	18.0818	17.7723	18.9986	18.5717	0.181215	2.04624	2.6968	2.76221	1.80639	2.66684	112.7	3.01551	3.23967	2.99821	1.65602	2.72095	1.64142	2.41181	39.6516	2.45839
mmu-miR-153	23.6358	21.7418	20.5563	22.794	21.6441	21.8054	23.091	21.7213	21.3753	23.119	21.4216	22.1143	0.371075	1.16092	2.32133	0.710081	1.57559	1.45859	0.554912	1.26352	1.74128	0.388305	1.62737	1.23051	1.28444	1.24809	1.18657	1.08206
mmu-miR-155	18.7842	19.0055	17.9109	20.096	18.5654	13.834	19.8069	17.9488	16.8318	17.2498	17.9775	15.7641	1.00713	0.727228	1.36534	0.433147	1.25138	34.4126	0.508142	1.62325	3.81735	2.13366	1.66507	9.43733	1.03324	12.0324	1.98291	4.41202
mmu-miR-15a*	19.3251	20.7942	20.4965	22.3944	21.3355	20.9367	21.8023	21.4607	21.059	20.8892	21.204	20.786	2.15508	0.655274	0.70813	0.27412	0.571073	0.779456	0.396752	0.442984	0.634527	0.533045	0.55378	0.904284	1.17283	0.54155	0.491421	0.663703
mmu-miR-16*	22.1564	22.0986	22.0083	23.2768	22.8339	22.7205	23.1748	22.7961	21.8565	22.3576	22.8266	21.8636	1.11644	0.978262	0.915605	0.548304	0.745304	0.834674	0.565004	0.647254	1.34604	0.710271	0.663114	1.57986	1.00344	0.709427	0.852766	0.984414
mmu-miR-182	21.834	21.7426	20.7185	23.4091	22.7189	22.9367	22.1305	21.3517	21.7995	21.8074	22.7713	22.2529	0.885936	0.79457	1.42058	0.317446	0.512199	0.455955	0.739452	1.11789	0.888609	0.659991	0.437256	0.765486	1.0337	0.428533	0.915315	0.620911
mmu-miR-1839-3P	15.4735	16.1796	15.7503	17.3555	17.0536	16.7818	17.1144	16.4247	15.8569	16.1983	17.2309	15.8131	1.46936	0.758195	0.897615	0.425624	0.524718	0.65581	0.483008	0.686446	1.10321	0.65029	0.410796	1.34137	1.04172	0.535384	0.757556	0.80082
mmu-miR-1839-5P	16.7813	17.3483	17.3999	18.1191	17.7922	17.9405	18.0152	18.392	17.5371	17.4881	18.4288	17.7439	1.53979	0.874995	0.742219	0.65043	0.815807	0.762062	0.671124	0.455419	0.893103	0.690022	0.464555	0.912728	1.05234	0.742766	0.673216	0.689102
mmu-miR-186*	20.736	20.0003	19.1693	20.9055	20.2063	20.5427	20.7099	20.7483	20.0572	19.9597	20.155	19.6852	0.687812	0.964184	1.50789	0.652985	1.06017	0.869294	0.717958	0.616	1.07838	0.861617	0.972466	1.64597	1.0533	0.860815	0.804112	1.16002
mmu-miR-187	18.4763	16.4233	15.9163	17.6806	17.1407	17.3055	16.7446	16.678	16.0082	16.4761	16.8818	16.6577	0.403289	1.40881	1.76008	0.747464	1.0867	1.00354	1.37301	1.26695	2.18543	1.18002	1.15107	1.64319	1.19073	0.945902	1.60846	1.32476
mmu-miR-18a*	23.8082	23.8138	24.1579	24.4815	24.6643	23.399	24.0917	24.5597	23.4681	23.7444	24.3148	24.3174	1.27101	1.06581	0.738198	0.850957	0.749691	1.86569	1.07051	0.681965	1.57578	0.97165	0.845587	1.03157	1.025	1.15545	1.10942	0.949603
mmu-miR-191*	16.1216	22.9066	21.9003	24.2424	22.7744	24.359	26.7441	24.8204	23.7287	23.5197	22.4529	22.9283	21.3399	0.162896	0.287672	0.0818504	0.226418	0.0781567	0.0138756	0.0463865	0.107188	0.0925271	0.25047	0.220183	7.26348	0.128808	0.0558166	0.187727
mmu-miR-193*	21.8608	21.4153	21.3649	21.6825	22.2518	22.7149	21.7402	21.7156	20.8689	21.9792	21.72	21.786	0.941954	1.07987	0.9831	1.13804	0.766952	0.576007	1.0498	0.940937	1.83477	0.634686	0.981586	1.14603	1.00164	0.827	1.27517	0.920767
mmu-miR-1930	22.3581	21.9076	22.8362	22.5817	22.8643	21.7997	22.9019	22.7113	22.3581	22.3789	21.7529	22.7436	1.17835	1.35551	0.626071	1.07743	0.88579	1.91795	0.828584	0.833226	1.154	0.849454	1.69417	1.04197	1.05331	1.29372	0.938605	1.1952
mmu-miR-1932	24.0779	26.2126	26.7474	24.3328	23.8329	27.9004	22.794	26.8233	27.9683	25.5427	27.6473	26.6471	3.55282	0.681027	0.413297	3.17883	4.49531	0.277571	8.86805	0.478574	0.23464	0.941399	0.282867	0.691524	1.54905	2.65057	3.19375	0.638597
mmu-miR-193b	15.6231	15.9082	15.8368	16.7052	16.154	17.217	17.0798	16.4979	15.9767	16.4199	16.3732	16.2536	1.31387	0.90771	0.838498	0.662561	0.970889	0.481082	0.4907	0.647161	1.00706	0.553154	0.738308	0.980328	1.02002	0.704844	0.714972	0.757263
mmu-miR-1949	23.8128	25.0888	24.785	25.243	25.7444	26.1613	27.229	24.5429	24.4552	23.981	24.3908	23.8437	1.96836	0.684197	0.742529	0.779844	0.550871	0.427181	0.189004	1.07179	1.23493	1.28119	1.24622	2.22545	1.1317	0.585965	0.831908	1.58429
mmu-miR-1954	25.9132	22.6398	21.1555	11.1802	21.1674	23.2884	23.3017	23.2224	24.5632	22.3288	22.9069	23.5159	0.18308	1.49018	3.6654	5323.12	5.24475	1.24817	1.147	1.06778	0.457076	1.60621	1.39037	1.11417	1.77955	1776.54	0.890617	1.37025
mmu-miR-1964	19.3402	19.829	21.1414	20.1838	20.9354	19.7208	20.3669	20.2177	20.0398	19.7864	19.7195	22.1199	1.9874	1.19226	0.422031	1.18247	0.702305	1.68732	0.999992	0.977151	1.19851	1.06686	1.44419	0.334303	1.20056	1.1907	1.05855	0.948449
mmu-miR-1981	21.4681	22.6028	19.3727	20.9885	21.8746	21.7765	21.7245	22.1083	21.8959	22.0411	21.4197	22.6507	0.937783	0.35953	2.96594	1.3961	0.755405	0.837089	0.80485	0.543504	0.682757	0.461065	0.91661	0.477265	1.42108	0.996198	0.677037	0.618313
mmu-miR-1982.1	18.9146	18.7557	20.4822	19.4398	18.9141	19.9176	19.2332	19.832	20.3601	19.156	19.8031	19.8987	1.62127	1.5237	0.404803	1.2028	1.73161	0.89416	1.33262	0.775334	0.582988	1.00309	0.827756	0.946784	1.18326	1.27619	0.896982	0.925877
mmu-miR-20a*	20.8332	22.2877	21.8356	23.4158	22.9355	22.9263	22.9007	23.3496	22.768	22.6052	22.7961	22.6497	2.06556	0.634472	0.763045	0.368149	0.513607	0.535108	0.505178	0.326095	0.529109	0.442348	0.500797	0.677407	1.15436	0.472288	0.453461	0.540184
mmu-miR-21*	25.1676	25.2511	23.8909	25.5646	23.0907	25.6929	23.3071	22.4705	22.2928	22.2827	22.9967	22.6617	0.888757	0.706064	1.59358	0.720591	4.00323	0.682533	3.3083	5.20563	6.38416	4.80115	3.78236	5.83117	1.0628	1.80212	4.96603	4.80489
mmu-miR-212	12.2714	12.0647	11.7693	12.8849	12.8333	12.135	11.6923	11.8103	11.4449	11.7976	12.3997	11.3694	0.993981	0.965653	1.04184	0.693681	0.718937	1.20762	1.52223	1.23595	1.72636	1.00963	0.859522	2.14561	1.00049	0.873413	1.49484	1.33826
mmu-miR-2135	19.4397	18.4738	18.9366	19.0104	18.1932	18.8433	17.8246	17.9851	18.4514	18.1645	18.3249	19.004	0.833872	1.37111	0.874638	1.19881	2.11236	1.3935	2.61844	2.06438	1.62007	1.47614	1.70682	1.30282	1.02654	1.56822	2.10096	1.49526
mmu-miR-2138	16.4125	16.2236	16.6196	16.4714	16.0598	16.7702	14.8982	16.2608	16.4161	15.5739	15.3797	16.9736	1.17578	1.12827	0.753809	1.20516	1.60299	1.01421	3.4432	1.17983	1.14866	1.53793	2.27376	0.92059	1.01929	1.27412	1.9239	1.57743
mmu-miR-2146	12.5427	12.0857	12.4066	12.8339	12.3946	12.9292	12.7681	12.838	12.732	11.8953	12.9957	12.4794	1.02095	1.17969	0.830288	0.890774	1.2079	0.863241	0.895186	0.751495	0.876925	1.16955	0.704894	1.23224	1.01031	0.987304	0.841202	1.03556
mmu-miR-218-1*	23.2771	22.7584	22.1703	23.7321	23.0755	23.1735	23.1705	23.8833	23.1345	22.7126	23.3775	22.3761	0.804269	0.969982	1.28184	0.626424	0.987445	0.955153	0.887671	0.477236	0.869496	0.869885	0.709029	1.73478	1.0187	0.856341	0.744801	1.10456
mmu-miR-2182	16.8549	16.7956	16.8383	16.4444	16.5723	17.6085	15.7728	16.6181	17.2506	16.5228	16.4168	17.5559	1.15051	1.00914	0.861305	1.63267	1.49418	0.754261	2.49704	1.22462	0.856482	1.05933	1.47329	0.817562	1.00699	1.2937	1.52605	1.11673
mmu-miR-224	24.7645	24.3799	24.7642	25.7023	24.9678	24.4055	25.1983	26.1241	23.7191	25.0219	24.908	25.4103	1.07123	1.17724	0.792966	0.597048	0.993381	1.51856	0.812928	0.377067	2.16521	0.655431	0.916586	0.790877	1.01381	1.03633	1.1184	0.787631
mmu-miR-28*	17.9005	18.6243	18.4259	18.9867	18.5353	18.1635	18.8566	19.241	18.52	18.7903	18.0894	18.5296	1.56261	0.7965	0.803457	0.785822	1.0745	1.43935	0.82566	0.557342	0.996093	0.616815	1.29565	1.16713	1.05419	1.09989	0.793032	1.02653
mmu-miR-298	20.3456	20.783	19.685	22.1498	21.5373	20.9797	21.8192	20.7534	20.4966	21.0567	21.2908	22.28	1.11203	0.691266	1.30089	0.339963	0.519774	0.791997	0.410476	0.757143	0.980867	0.496838	0.545859	0.336075	1.03473	0.550578	0.716162	0.459591
mmu-miR-29b*	22.4523	21.928	22.3225	23.108	22.862	20.9481	22.7294	22.1764	21.2177	22.4289	21.8221	21.7251	1.00664	1.21876	0.815094	0.682197	0.809056	3.15606	0.85159	1.10086	2.31979	0.748251	1.4726	1.92483	1.0135	1.5491	1.42408	1.38189
mmu-miR-300*	24.2602	24.5742	23.8462	24.642	23.7778	25.7868	24.828	24.6519	25.1818	25.0181	24.8044	24.3039	1.14411	0.774738	1.12818	0.937525	1.70659	0.438956	0.791266	0.787728	0.591551	0.494858	0.741596	1.28216	1.01568	1.02769	0.723515	0.839537
mmu-miR-300	17.089	21.7831	21.3326	22.1721	22.0728	22.0774	17.3843	22.7286	21.8433	21.797	21.8205	22.4781	9.23308	0.300256	0.360713	0.290822	0.31154	0.321498	7.713	0.167286	0.335035	0.258367	0.328485	0.254511	3.29802	0.307953	2.73844	0.280454
mmu-miR-30b*	23.0857	23.6235	22.8267	23.5965	23.7944	23.2	22.9112	23.2642	23.056	23.4833	22.5922	23.3546	1.24879	0.724083	1.10592	0.93571	0.815814	1.27517	1.44472	0.996679	1.24846	0.693349	1.66164	1.1972	1.02626	1.0089	1.22995	1.18406
mmu-miR-31*	19.5572	17.817	17.4746	17.743	17.9946	18.513	17.5832	18.3215	18.5249	17.6412	18.3275	17.818	0.484063	1.36138	1.51747	1.8175	1.5266	1.10337	1.94944	1.02969	0.969637	1.33607	1.07297	1.86682	1.12097	1.48249	1.31625	1.42529
mmu-miR-31	14.613	15.2224	14.2563	15.3953	15.3084	14.708	15.9616	14.5942	14.5313	14.5982	15.4504	14.5905	1.24125	0.684902	1.17628	0.770581	0.818417	1.28457	0.499661	1.13592	1.28647	0.917191	0.656565	1.45633	1.03415	0.957857	0.97402	1.01003
mmu-miR-322*	20.5214	20.4362	20.2047	21.3715	20.811	20.6397	21.1353	20.7094	20.3446	20.5818	21.6482	20.5452	1.06701	0.95288	0.983545	0.63198	0.932059	1.08651	0.714711	0.846052	1.18127	0.748424	0.461827	1.21236	1.00114	0.883517	0.91401	0.807536
mmu-miR-324-3p	22.5653	17.1734	16.7508	20.2831	17.6403	17.5616	17.4502	16.9799	16.9399	13.9937	17.2466	17.7614	0.0879074	3.10709	3.66117	0.456506	2.85113	3.11714	3.12299	3.81234	4.24974	24.4602	3.31584	2.83638	2.28539	2.14159	3.72835	10.2041
mmu-miR-326	10.2096	18.8161	17.2882	18.7856	18.2972	19.1177	10.8084	18.7743	18.2391	18.424	18.4906	18.3554	43.8941	0.0947993	0.240319	0.1228	0.172275	0.10099	29.7116	0.104705	0.164515	0.108087	0.133378	0.179016	14.7431	0.132021	9.9936	0.14016
mmu-miR-329	20.7052	20.7305	20.1228	20.9106	21.0505	20.4789	21.6322	20.7819	20.5902	21.0727	20.9252	21.5218	1.02944	0.851517	1.14079	0.953294	0.865176	1.33111	0.555033	0.881733	1.09185	0.5836	0.83537	0.675173	1.00725	1.04986	0.842872	0.698048
mmu-miR-330	15.7691	15.4797	15.3681	15.5312	15.471	15.1983	16.0492	16.822	15.3849	15.5315	15.3842	14.9275	0.998228	1.02694	0.975495	1.25686	1.31039	1.6388	0.842739	0.434586	1.27591	0.860771	1.23195	2.06634	1.00022	1.40202	0.85108	1.38635
mmu-miR-337	17.4278	17.5526	16.7627	17.9328	17.9804	17.7409	17.7612	17.9592	17.8355	17.5608	17.758	18.3376	1.03343	0.79788	1.21278	0.777529	0.752283	0.919438	0.840816	0.645851	0.762952	0.689289	0.776952	0.635395	1.0147	0.816417	0.749873	0.700545
mmu-miR-337-3p	19.5605	19.6647	19.2498	20.1816	19.8573	18.7356	20.6794	20.0234	19.6228	20.093	20.2775	20.7974	1.11631	0.874249	1.02466	0.774909	0.9702	2.18567	0.526908	0.731548	1.04704	0.564469	0.641886	0.547087	1.00507	1.31026	0.768499	0.584481
mmu-miR-337-5p	15.8339	16.3093	15.7477	16.7686	16.7996	15.754	17.0544	16.2585	16.0549	16.4162	16.7062	16.8111	1.28103	0.775636	1.00643	0.715532	0.700336	1.49654	0.56355	0.86211	1.07637	0.625785	0.661438	0.751677	1.02103	0.970804	0.83401	0.679633
mmu-miR-339-3p	19.8235	18.8423	18.1261	20.4622	19.8232	19.8022	20.5716	18.8657	19.5061	18.8185	19.8241	18.149	0.630569	1.04784	1.51346	0.432406	0.673356	0.707345	0.384859	1.10631	0.769533	0.925589	0.595723	2.325	1.06396	0.604369	0.753567	1.28211
mmu-miR-342-5p	19.9697	19.7082	19.0887	20.4357	20.3497	19.7888	20.1546	19.5944	19.6077	19.9216	20.392	19.9888	0.899226	0.907396	1.22556	0.695066	0.737761	1.12664	0.810923	1.05352	1.13177	0.679966	0.634225	1.02502	1.01073	0.853155	0.998737	0.779736
mmu-miR-344	17.224	16.5913	16.4553	15.3555	17.2192	17.644	16.9509	17.1026	16.574	16.3423	17.4288	17.6434	0.846976	1.10552	1.06797	3.30223	0.907355	0.699746	1.04924	0.832201	1.30163	1.14144	0.69461	0.731563	1.00682	1.63644	1.06102	0.85587
mmu-miR-345	19.4991	19.798	18.9957	19.9716	19.8136	19.7238	19.3876	19.7613	19.588	19.673	19.6349	19.6736	1.11682	0.764221	1.17165	0.859363	0.958815	1.05633	1.23681	0.841116	1.02839	0.724039	0.960746	1.14309	1.01756	0.95817	1.03544	0.942625
mmu-miR-345-5p	19.8162	19.8612	19.3296	20.3813	20.0563	20.1121	20.4286	19.8257	19.9663	19.9958	19.9154	19.7582	1.0573	0.862697	1.09633	0.762976	0.955767	0.951903	0.708962	0.948695	0.933119	0.682758	0.932915	1.27141	1.00544	0.890215	0.863592	0.962362
mmu-miR-34b	22.7214	22.6589	21.6809	24.6194	23.1697	22.2113	25.8783	24.6716	21.6922	23.0862	22.8203	22.8352	0.90747	0.797707	1.38142	0.259967	0.710115	1.42843	0.104296	0.212108	1.81375	0.515432	0.800893	0.968755	1.02886	0.799504	0.71005	0.761693
mmu-miR-34b-3p	13.1012	13.5251	13.2711	15.4468	13.6753	13.4745	15.8193	14.5848	13.2464	13.6647	13.814	13.6131	1.34307	0.842729	0.883511	0.282119	0.963201	1.14604	0.209232	0.433794	1.18939	0.664695	0.774487	1.08802	1.0231	0.797119	0.610807	0.8424
mmu-miR-34b-5p	20.7223	20.5661	20.1039	22.3804	20.6652	20.7637	22.9594	22.1462	20.4459	20.5571	21.1897	20.7264	0.978977	0.918367	1.11227	0.331191	1.08744	1.05146	0.212865	0.329555	1.1612	0.802896	0.669246	1.12765	1.00321	0.823362	0.567875	0.866597
mmu-miR-34c*	15.5633	15.7863	15.2628	18.0218	15.9988	15.868	18.1948	17.0138	14.761	14.7913	16.7311	15.028	1.15007	0.82949	1.04825	0.223406	0.907996	1.02918	0.190255	0.380111	1.96424	1.43639	0.483825	1.92532	1.00927	0.720196	0.844869	1.28185
mmu-miR-351	22.7591	21.7268	21.9881	22.1557	22.5426	22.055	23.4309	20.6498	21.3115	22.9176	21.696	22.7212	0.771889	1.32898	0.974823	1.2521	0.957584	1.39001	0.496716	3.0085	2.06189	0.505828	1.52442	0.91538	1.02523	1.1999	1.8557	0.981875
mmu-miR-362-3p	20.8786	20.3286	20.6562	21.7403	20.7839	20.335	22.0426	21.054	20.8129	20.7285	21.6696	22.1746	0.979496	1.20722	0.845691	0.575516	1.11676	1.57808	0.448086	0.783446	1.004	0.79496	0.535055	0.460799	1.0108	1.09012	0.745177	0.596938
mmu-miR-362-5p	23.5665	23.3229	22.818	23.7405	23.9776	23.575	23.8246	22.601	21.8378	23.7736	24.0875	23.2246	0.931006	0.927903	1.15756	0.881058	0.747539	1.02303	0.798069	1.64208	3.02201	0.589854	0.61321	1.36307	1.00549	0.883876	1.82072	0.855377
mmu-miR-370	19.8742	20.627	17.8287	20.9466	20.1622	21.07	19.7412	19.7912	19.4538	20.829	19.0461	19.3518	0.868551	0.433895	2.65351	0.440956	0.759492	0.419083	0.976331	0.830943	1.13837	0.327733	1.45733	1.44098	1.31865	0.539844	0.981882	1.07535
mmu-miR-374-5p	16.7723	16.3054	16.3468	17.063	16.704	17.0915	16.5194	16.4212	18.5484	16.2527	16.3718	17.376	0.952688	1.10845	0.946963	0.831532	1.0665	0.844004	1.16375	1.09761	0.272426	0.998911	1.18854	0.724213	1.0027	0.914012	0.844594	0.970555
mmu-miR-376a*	18.5722	18.6478	18.6983	19.1795	19.2925	17.8966	18.9479	19.2147	18.6872	18.7928	19.1734	19.027	1.22671	0.979935	0.831877	0.859716	0.79494	2.16572	0.969237	0.709784	1.10935	0.770009	0.764283	1.03388	1.01284	1.27346	0.929456	0.856056
mmu-miR-376a	25.1594	15.3432	15.2711	14.3534	15.6855	15.2045	15.9485	15.3972	14.7528	13.7939	15.719	15.6269	0.0123394	9.36425	8.65434	23.5859	9.36854	13.5362	7.49604	9.6787	16.4032	23.8128	8.10268	10.5557	6.01031	15.4969	11.1926	14.1571
mmu-miR-376b	25.8241	15.5911	15.4713	15.2298	15.7613	16.8773	14.9548	15.134	15.1368	12.6731	15.7414	16.9531	0.0100659	10.1977	9.74196	16.6155	11.4945	5.4904	19.3028	15.0209	16.2557	66.9664	10.3171	5.4441	6.6499	11.2001	16.8598	27.5759
mmu-miR-376c	14.2638	14.4392	13.7755	15.1648	15.2851	14.5592	15.417	14.7826	14.1942	14.6351	14.9428	15.2795	1.08918	0.811921	1.1308	0.622755	0.57292	0.981003	0.502031	0.686677	1.11946	0.615879	0.642983	0.622279	1.01063	0.725559	0.769391	0.627047
mmu-miR-379	13.9771	15.2816	14.7242	15.7702	15.8165	16.806	16.2683	15.2683	14.8209	15.226	15.7509	16.2294	1.88093	0.641037	0.829363	0.579439	0.561149	0.29259	0.393931	0.694191	1.02633	0.578825	0.519859	0.456022	1.11711	0.477726	0.704816	0.518236
mmu-miR-380-5p	25.8021	16.3413	15.8218	16.8018	16.9558	16.7706	17.6368	16.1992	16.1183	15.1335	17.137	16.7794	0.0131138	7.7789	9.80285	7.16996	6.44435	7.58508	3.85927	9.2106	10.5627	15.6115	5.03124	7.87903	5.86496	7.06646	7.87751	9.50725
mmu-miR-383	16.0427	17.4551	16.6135	17.6188	17.6542	17.9594	18.1135	16.7534	16.7063	17.5674	17.7323	16.7924	1.8514	0.585512	0.922495	0.662967	0.646896	0.542005	0.451746	1.02183	1.14471	0.470632	0.542478	1.27192	1.1198	0.617289	0.87276	0.761678
mmu-miR-384-3p	17.0162	18.668	18.3339	19.5241	19.3753	20.2445	19.6758	19.3662	18.7292	19.1575	19.68	19.7905	2.32529	0.622919	0.690385	0.436466	0.483901	0.274243	0.377247	0.411954	0.694643	0.38549	0.346817	0.392616	1.21286	0.398203	0.494615	0.374974
mmu-miR-412	19.5584	19.6883	19.4915	20.0646	20.1241	19.6507	19.9205	19.73	19.2235	19.7855	19.85	19.4056	1.18803	0.913979	0.92095	0.893035	0.856989	1.23174	0.947557	0.952732	1.46746	0.742366	0.917376	1.52568	1.00765	0.993923	1.12258	1.06181
mmu-miR-424	20.1381	19.7961	19.2922	20.7492	19.9939	19.2772	21.1939	19.9119	19.737	19.8393	20.5249	20.0241	0.889852	0.949433	1.18364	0.621996	1.04993	1.78636	0.438794	0.940186	1.15078	0.800594	0.643246	1.1124	1.00764	1.15276	0.843253	0.852079
mmu-miR-429	17.2761	18.1936	17.2603	19.1362	18.1327	19.3597	19.0969	17.468	17.1878	17.869	18.4205	17.4643	1.44204	0.642678	1.07902	0.424111	0.850267	0.376055	0.418439	1.14032	1.50149	0.699303	0.61657	1.46204	1.05458	0.550144	1.02008	0.925972
mmu-miR-434-5p	19.6377	18.2235	17.724	18.1919	18.3802	18.5809	19.0641	18.4708	17.7804	17.0389	19.0026	18.2777	0.542727	1.21758	1.51329	1.5785	1.38532	1.24796	0.827994	1.10064	1.92578	2.40462	0.796656	1.60913	1.0912	1.40392	1.2848	1.60347
mmu-miR-449b	24.1819	24.9328	23.2632	26.3679	25.4393	26.6667	26.8943	25.0504	24.7628	25.3213	24.8368	24.5169	1.12631	0.563428	1.57581	0.26428	0.503023	0.222412	0.176163	0.557201	0.737473	0.37396	0.676104	1.03145	1.08852	0.329905	0.490279	0.693838
mmu-miR-451	15.6194	17.1172	17.8185	18.5569	17.3923	17.6573	19.168	18.7774	18.4488	16.3654	19.1523	18.729	2.75082	0.819949	0.443353	0.383376	0.859445	0.740433	0.240994	0.278376	0.379042	1.19961	0.224626	0.368148	1.33804	0.661085	0.299471	0.597462
mmu-miR-466a-3p	26.105	22.5163	21.6986	22.9246	22.7757	20.3722	22.4327	24.7652	21.9874	22.4772	23.2759	22.8534	0.184611	1.86972	2.89711	1.78682	1.98103	10.8508	2.4126	0.422057	3.13843	1.66902	1.23991	2.03094	1.65048	4.87288	1.99103	1.64662
mmu-miR-466b-3-3p	20.9474	21.8103	22.5037	21.8402	22.9569	21.4098	23.504	23.4347	21.7242	22.2474	23.9032	21.4682	2.04769	0.947775	0.515264	1.17747	0.542968	1.64272	0.356798	0.32985	1.17045	0.608236	0.249455	1.64857	1.17024	1.12105	0.619033	0.835422
mmu-miR-467a	18.7628	18.2988	17.8284	19.4897	19.7661	20.6367	19.8546	18.7955	18.2272	19.0923	19.7565	20.036	0.847585	0.984176	1.19879	0.546765	0.451439	0.255595	0.407658	0.748433	1.20325	0.493316	0.402302	0.405064	1.01018	0.417933	0.786447	0.433561
mmu-miR-467b	24.6244	22.1246	24.3305	22.7311	21.5001	23.7333	22.7857	23.0114	25.6649	22.0455	23.205	24.4225	0.613999	2.92347	0.557101	2.43532	5.71629	1.25863	2.25136	1.69643	0.292351	2.68326	1.55226	0.815821	1.36486	3.13675	1.41338	1.68378
mmu-miR-467c	18.5572	20.3444	20.3034	24.7421	21.1966	21.1274	21.7564	20.7489	20.2667	21.3498	20.8013	21.3253	2.64891	0.646055	0.584337	0.0388735	0.453904	0.49299	0.295645	0.52372	0.793175	0.279609	0.528476	0.449169	1.2931	0.328589	0.537513	0.419085
mmu-miR-467d	23.9489	23.8957	23.6239	25.0363	24.8316	24.2417	24.5808	23.2469	22.8064	23.4474	22.1004	24.586	1.07288	0.937103	0.99463	0.539072	0.621263	0.968075	0.709731	1.57645	2.31966	1.11087	3.65187	0.796892	1.00154	0.70947	1.53528	1.85321
mmu-miR-467e	20.6777	20.567	22.7448	21.6272	21.043	22.7525	22.0062	23.233	21.5349	20.1577	25.0826	20.9619	1.84005	1.67242	0.324955	1.01726	1.52513	0.482741	0.751065	0.28275	0.994734	1.92973	0.0820951	1.74538	1.27914	1.00838	0.676183	1.2524
mmu-miR-467F	16.5994	14.422	14.6627	15.1118	13.9867	15.711	14.7563	15.4934	16.6195	14.6765	14.7515	14.8796	0.452572	1.72326	1.28222	1.35493	2.95537	0.92595	1.66441	0.879876	0.437084	1.2551	1.53977	1.72194	1.15268	1.74542	0.99379	1.5056
mmu-miR-485-3p	18.0458	17.8267	18.4282	18.2342	17.857	16.7818	17.722	18.3058	17.5556	17.8081	17.7366	18.1929	1.21587	1.19142	0.690316	1.13922	1.47962	3.22764	1.56002	0.917135	1.67262	1.04853	1.4239	1.26831	1.03254	1.94883	1.38326	1.24691
mmu-miR-487b	15.8165	15.5425	15.4599	16.295	16.1776	15.053	16.7744	16.0708	15.3135	15.7987	16.5595	15.7275	1.01209	1.03023	0.959062	0.775603	0.841336	1.89911	0.534132	0.766483	1.40469	0.749433	0.571577	1.24354	1.00046	1.17202	0.901769	0.85485
mmu-miR-489	24.3194	23.8214	23.6004	11.4959	24.4674	24.1658	27.6373	24.7094	24.0601	24.2399	24.5703	23.492	0.883873	1.05079	1.0767	6840.39	0.851671	1.08664	0.0908581	0.609226	1.03604	0.683062	0.702012	1.81161	1.00379	2280.78	0.578707	1.06556
mmu-miR-491	18.6306	15.8301	15.6267	16.2044	16.5055	15.8362	16.2543	16.0862	15.7881	12.7732	16.7021	16.2086	0.306246	1.79606	1.81806	1.75745	1.42637	2.34833	1.63	1.61369	2.15127	12.9855	1.10181	1.89582	1.30679	1.84405	1.79832	5.32771
mmu-miR-495	15.9966	15.1623	15.415	16.2273	15.8645	16.5073	16.2213	15.7756	15.3462	15.3734	16.2103	16.4141	0.844158	1.26705	0.93494	0.768124	0.987732	0.654925	0.740565	0.888717	1.29768	0.951038	0.688007	0.730118	1.01538	0.803594	0.975654	0.789721
mmu-miR-496	21.8806	21.6966	19.8159	22.5257	21.2855	20.6729	22.5273	22.0726	20.4809	22.9177	20.8593	21.5827	0.696422	0.665977	2.1561	0.475448	1.12321	1.77789	0.456015	0.550661	1.79957	0.248214	1.33604	0.988926	1.17283	1.12552	0.935415	0.857728
mmu-miR-497	17.6251	17.2587	17.1867	18.3165	17.7226	18.8242	18.4203	17.3806	17.284	17.7621	17.7858	19.8221	0.972199	1.05503	0.974944	0.642775	0.970118	0.468017	0.574285	1.04032	1.20608	0.646604	0.821998	0.244911	1.00072	0.693637	0.940228	0.571171
mmu-miR-500	23.7327	21.1438	19.8013	19.5144	21.8099	21.4104	23.315	20.5818	20.5873	16.0857	21.171	21.7255	0.259562	1.31455	2.93076	5.15848	1.05076	1.43488	0.355438	2.08242	2.24921	38.051	1.4484	1.2053	1.50163	2.54804	1.56236	13.5682
mmu-miR-501*	21.9463	19.8495	19.3983	20.8825	20.677	19.6922	21.1781	19.8278	19.8394	21.1468	20.2936	20.8217	0.400337	1.44159	1.73274	0.893497	1.03027	2.11089	0.698959	1.57024	1.68888	0.509619	1.18969	1.00829	1.19155	1.34488	1.31936	0.902531
mmu-miR-503*	22.8164	21.2732	20.8327	22.0172	21.8619	22.1061	22.8211	21.5802	21.0534	20.8347	22.2734	21.0391	0.518326	1.27162	1.51718	0.963007	1.07248	0.937362	0.529615	1.10296	1.7229	1.49727	0.713771	2.0524	1.10238	0.990949	1.11849	1.42115
mmu-miR-503	23.7727	21.8356	20.7928	16.0551	22.4656	21.9302	26.535	21.9173	22.0875	23.9064	20.6179	22.9679	0.37595	1.21184	2.19494	84.4849	0.993163	1.49026	0.0568004	1.22873	1.184	0.250624	3.16444	0.758615	1.26091	28.9894	0.823179	1.39123
mmu-miR-540	19.9216	23.8032	22.7835	24.0807	23.4659	22.5957	23.6707	23.1727	22.9412	22.5468	23.716	23.0946	5.56106	0.317621	0.566152	0.332351	0.508938	0.963088	0.423983	0.527589	0.671594	0.659269	0.37883	0.712251	2.14828	0.601459	0.541055	0.58345
mmu-miR-541	19.8019	19.4488	19.0745	19.8163	19.7499	19.7739	19.7633	19.5359	18.9099	18.7844	19.858	18.9408	0.912206	0.980807	1.1177	0.964224	1.00968	1.02803	0.960443	0.990729	1.65783	1.3506	0.829254	1.91393	1.00357	1.00064	1.203	1.36459
mmu-miR-542-5p	24.7182	24.5627	22.5332	24.4616	25.8041	25.8064	24.7338	22.5995	23.0602	24.2291	24.3033	24.6663	0.681781	0.63925	2.29448	0.869647	0.342928	0.354461	0.691421	2.6745	2.10722	0.699908	0.859119	0.816398	1.20517	0.522345	1.82438	0.791808
mmu-miR-543	19.0964	19.2379	18.8461	19.8347	19.5452	20.1735	19.6092	20.2756	19.907	19.4262	19.836	19.5193	1.1418	0.871348	1.00512	0.730755	0.89314	0.59819	0.820324	0.455418	0.63756	0.66442	0.646319	0.983811	1.00609	0.740695	0.637768	0.76485
mmu-miR-544	17.7678	16.036	15.7706	16.8147	16.6702	16.0902	16.8367	16.5711	15.7506	16.148	16.7188	16.7177	0.494678	1.38314	1.46155	1.0225	1.13025	1.7491	0.966902	1.02416	1.96104	1.1119	0.967403	1.18324	1.11312	1.30062	1.31737	1.08751
mmu-miR-547	20.8242	22.1785	21.2946	22.8274	22.3822	23.7201	24.7459	22.6066	21.6982	23.4268	22.2738	22.6264	1.7848	0.587667	0.95341	0.475346	0.647193	0.265056	0.120732	0.46864	0.953729	0.214924	0.617612	0.591154	1.10862	0.462532	0.514367	0.474563
mmu-miR-582-5p	22.8031	20.8038	20.978	22.2723	21.838	22.5332	21.7442	21.0152	20.7595	21.01	21.7795	22.7359	0.483914	1.62858	1.26889	0.746417	1.00858	0.64489	1.03343	1.5093	1.95381	1.22653	0.929819	0.585637	1.12713	0.799961	1.49885	0.913994
mmu-miR-592	17.9569	17.563	17.3608	18.2338	17.9359	18.3444	18.4641	18.1516	17.7507	17.2155	18.5426	17.2872	0.931462	1.03029	1.04202	0.820837	1.00912	0.787043	0.671849	0.735125	1.05239	1.13898	0.586627	1.71156	1.00126	0.872334	0.819788	1.14572
mmu-miR-598	17.8303	19.1754	19.4115	20.1913	19.7737	19.7765	20.3731	20.4585	19.7548	20.3942	20.0072	20.3243	2.30213	0.762858	0.569413	0.47846	0.639064	0.660312	0.405006	0.336342	0.593934	0.284758	0.481201	0.472049	1.21147	0.592612	0.445094	0.41267
mmu-miR-674*	18.2022	18.4323	17.6428	18.6672	18.7622	18.5488	18.7635	17.8198	17.6286	18.3461	18.0239	17.7683	1.08507	0.778776	1.18339	0.839265	0.785798	0.94321	0.75379	1.27758	1.58154	0.718248	1.16046	1.69321	1.01575	0.856091	1.2043	1.19064
mmu-miR-676*	20.4979	20.397	21.4549	21.6774	20.9557	20.6824	21.4119	22.0211	20.7683	20.685	21.3319	21.1195	1.42693	1.28826	0.543995	0.672637	1.10928	1.38792	0.776322	0.448424	1.15865	0.916719	0.756557	1.0713	1.08639	1.05661	0.794466	0.91486
mmu-miR-685	22.3126	20.1743	21.7581	21.9464	20.0301	20.4594	19.1555	18.815	18.533	17.3758	18.676	19.7302	0.628502	2.32915	0.683117	0.864915	3.26471	2.50987	5.74727	6.41216	8.45329	14.0788	7.38782	4.34813	1.21359	2.21316	6.87091	8.60493
mmu-miR-690	13.9179	14.2724	13.2751	13.827	13.6343	14.6572	14.3867	14.5921	14.7701	14.1817	14.8069	14.6322	1.09544	0.721206	1.26576	1.24557	1.42361	0.725291	0.811392	0.620054	0.594262	0.667268	0.559061	0.771215	1.02747	1.13149	0.675236	0.665848
mmu-miR-700	20.5886	18.7802	18.808	19.0134	19.0665	19.7874	18.8326	19.2812	19.5269	18.7995	19.3904	19.1562	0.510936	1.50648	1.29918	1.62554	1.56677	0.984077	1.76907	1.14221	1.04454	1.29147	1.10807	1.5929	1.10553	1.39213	1.31861	1.33081
mmu-miR-701	24.7747	24.9248	23.7853	25.7177	26.3696	25.2828	26.4075	25.3243	25.6858	24.7454	24.4665	24.6791	0.964467	0.731659	1.41711	0.535623	0.3409	0.749587	0.318808	0.595165	0.5023	0.719872	1.12867	1.1904	1.03775	0.542037	0.472091	1.01298
mmu-miR-702	22.2021	22.1006	22.804	22.4283	22.0962	22.0057	21.9779	22.4749	21.7075	22.0098	21.8142	22.2792	1.31434	1.18712	0.640911	1.1997	1.51022	1.66467	1.57384	0.982639	1.81359	1.09833	1.62553	1.4392	1.04746	1.4582	1.45669	1.38769
mmu-miR-704	24.6853	23.4975	24.219	24.5637	23.9474	24.8293	23.7835	24.9673	26.538	24.3166	24.9723	26.2964	0.798987	1.53214	0.816887	0.928068	1.42266	0.799197	1.53027	0.593513	0.216652	0.754488	0.618918	0.302102	1.04934	1.04998	0.780144	0.558503
mmu-miR-706	17.9945	17.8072	18.4542	18.0085	17.3174	19.2884	17.7804	17.8065	17.9875	17.5504	18.538	17.6698	1.24691	1.19515	0.671029	1.31841	2.12862	0.56213	1.48271	1.28301	1.22708	1.24073	0.808582	1.80393	1.0377	1.33639	1.33093	1.28441
mmu-miR-712	21.7379	21.0004	20.4922	21.6386	21.1946	20.4162	20.8267	20.7589	20.7857	20.1424	20.8001	21.1909	0.740478	1.03927	1.29945	0.846919	1.15213	2.0458	1.42753	1.31832	1.40308	1.63665	1.3406	1.24966	1.0264	1.34828	1.38298	1.40897
mmu-miR-720	11.861	12.3495	12.0385	12.2417	11.9727	12.3555	12.7842	13.4802	12.8074	12.9977	13.755	12.7037	1.36565	0.819415	0.893631	1.11991	1.34941	1.0714	0.738218	0.401537	0.694015	0.454239	0.347291	0.879579	1.02623	1.18024	0.611257	0.56037
mmu-miR-721	14.7527	12.9602	13.7276	13.5347	12.2326	14.0653	12.7022	14.7257	13.8512	13.404	21.751	15.7074	0.610631	1.78067	0.91968	1.51655	3.73954	1.0869	2.59299	0.561943	1.11708	1.13741	0.0045142	0.363919	1.10366	2.11433	1.424	0.501949
mmu-miR-770-3p	24.5719	21.5048	20.4815	24.7155	22.8515	22.4177	23.8583	20.7907	21.8898	15.1244	21.3068	21.6809	0.224025	1.58051	2.82428	0.216519	0.788178	1.10217	0.376612	2.78203	1.4081	114.397	2.03565	1.91953	1.54294	0.70229	1.52225	39.4509
mmu-miR-770-5p	16.7031	22.7806	20.1659	23.1341	21.7466	23.7691	25.5613	21.1147	22.7765	22.8153	24.1843	24.7396	10.6123	0.132284	0.712328	0.13132	0.343569	0.0875405	0.0234428	0.450383	0.154333	0.112204	0.0561376	0.0466877	3.81898	0.187477	0.209386	0.0716764
mmu-miR-7b	19.3918	19.5836	19.0669	19.7782	19.7449	20.2129	19.9475	20.5453	19.229	19.3526	19.8261	20.269	1.13542	0.836799	1.0525	0.927402	0.949096	0.710311	0.791852	0.461032	1.24477	0.853299	0.794159	0.714063	1.00824	0.86227	0.832553	0.787174
mmu-miR-805	12.9577	12.9839	12.5853	13.8304	13.639	12.9177	13.953	13.4741	12.6242	13.3329	13.7443	12.7165	1.08084	0.893481	1.03551	0.630253	0.719655	1.22827	0.555815	0.682536	1.33386	0.609517	0.592233	1.47572	1.00328	0.859393	0.857405	0.892491
mmu-miR-872*	17.073	16.7118	15.7623	17.6314	17.3262	17.6612	17.2421	16.6929	16.5755	16.2534	17.6567	15.8749	0.795683	0.860372	1.46074	0.576888	0.712763	0.585	0.725443	0.935325	1.10016	1.0271	0.501793	2.10875	1.03893	0.624884	0.92031	1.21255
mmu-miR-877*	17.7083	17.3984	17.4571	17.7743	17.5009	17.2144	17.7932	17.7412	17.6991	17.5316	17.9128	17.4893	1.02853	1.07323	0.90592	1.049	1.26792	1.60094	0.99405	0.908072	1.01372	0.85022	0.843621	1.38283	1.00256	1.30595	0.971949	1.02556
mmu-miR-879*	20.107	20.3893	19.7311	20.9134	20.7851	20.542	21.0428	21.4435	20.1051	20.6316	20.9886	20.4949	1.1458	0.793123	1.1004	0.699535	0.764614	0.936827	0.614016	0.40982	1.12366	0.582565	0.587816	1.01152	1.01311	0.800325	0.715831	0.727302
mmu-miR-93	16.2828	15.831	15.7159	17.003	16.4514	17.4684	17.3629	16.6637	15.971	16.2308	16.9618	17.1304	0.925345	1.06536	1.01438	0.599673	0.878952	0.449646	0.448646	0.641836	1.12487	0.701578	0.546255	0.59396	1.00169	0.642757	0.73845	0.613931
rno-miR-125b*	20.5548	19.8084	19.7168	21.1332	20.1989	20.5215	20.88	21.0573	20.7761	19.7427	21.2551	19.9079	0.811929	1.1466	1.07416	0.580546	1.10943	0.91842	0.664343	0.517663	0.682101	1.0426	0.472298	1.46853	1.0109	0.869465	0.621369	0.994476
rno-miR-146B	15.746	14.7194	14.6781	15.7228	15.2004	15.639	14.9104	15.3404	14.639	14.6281	15.6948	13.9594	0.721666	1.23762	1.11964	0.782998	1.12466	0.859045	1.32019	0.863441	1.52227	1.14546	0.706707	2.87597	1.02631	0.922233	1.2353	1.57605
rno-miR-148b-5p	21.6704	21.4	21.4071	22.3018	21.9009	21.9271	22.0288	21.8204	21.3252	21.6147	22.5103	21.4855	1.03501	1.05092	0.919362	0.713365	0.941908	0.957591	0.82763	0.84256	1.28765	0.786802	0.546536	1.35907	1.00176	0.870955	0.985948	0.89747
rno-miR-190b	21.0155	20.0824	21.0919	22.2049	20.8472	19.2605	23.8648	22.6639	21.0221	22.7288	22.7098	21.0704	0.960601	1.54395	0.674255	0.449691	1.15249	3.58363	0.136643	0.276782	0.936446	0.214254	0.280545	1.06814	1.0596	1.7286	0.449957	0.520978
rno-miR-204*	17.4183	17.0991	16.7759	18.8907	16.9548	17.1719	19.517	18.2211	16.2937	16.8915	16.9286	16.668	0.937579	0.984744	1.0831	0.36076	1.38031	1.22936	0.224398	0.485463	2.00216	0.987949	1.24434	1.82178	1.00181	0.990144	0.904008	1.35136
rno-miR-207	18.5945	19.3221	18.604	19.4958	19.7672	21.3158	19.1755	16.3088	19.6055	19.1647	20.7974	20.6451	1.38824	0.705744	1.02068	0.79357	0.657489	0.23268	0.951355	6.11441	0.674628	0.683884	0.285005	0.387077	1.03822	0.561246	2.58013	0.451988
rno-miR-20b	20.9829	17.4208	20.4347	23.1479	12.9456	22.981	17.5557	21.1404	21.9386	19.2529	14.4795	22.8969	0.452971	4.50366	0.49019	0.107836	127.05	0.12533	4.99507	0.366822	0.228718	1.09897	38.8397	0.138845	1.81561	42.4276	1.86354	13.3592
rno-miR-29c*	20.1371	19.4225	19.0011	20.2709	19.9256	19.8743	20.4441	19.8275	19.2506	19.609	20.5261	19.5086	0.76351	1.05473	1.24178	0.742947	0.943842	1.01251	0.63264	0.854679	1.38227	0.80523	0.551082	1.36345	1.02001	0.899767	0.956529	0.906588
rno-miR-339-3p	18.7225	19.1328	18.8019	20.5086	19.6315	20.2436	21.5588	19.3219	18.782	19.7423	19.7679	19.69	1.31109	0.830507	0.918381	0.405881	0.745475	0.504909	0.188189	0.781646	1.23215	0.472935	0.600385	0.774521	1.01999	0.552089	0.733996	0.615947
rno-miR-345-3p	21.6359	21.3553	20.723	23.0244	22.8494	21.1999	23.0544	21.9235	21.3503	22.6258	21.477	21.0393	0.8887	0.908712	1.23828	0.3624	0.409161	1.32888	0.340805	0.657601	1.06088	0.327273	0.937754	1.55228	1.0119	0.700148	0.686429	0.939102
rno-miR-351	23.2134	22.9131	22.8164	23.9912	23.6799	23.2143	25.2918	22.9296	23.4069	23.2367	23.5788	23.4467	0.996608	1.03313	0.971231	0.620627	0.770102	1.10089	0.241912	1.09593	0.853562	0.717241	0.731205	0.979341	1.00032	0.830541	0.730468	0.809262
rno-miR-352	18.8862	19.5494	19.8306	20.9791	19.7934	20.5906	21.5421	20.2349	20.2316	19.7967	20.3013	20.4764	1.69759	0.902352	0.652817	0.424841	0.966417	0.575748	0.276121	0.602046	0.654283	0.660507	0.601637	0.651266	1.08425	0.655669	0.510817	0.637803
rno-miR-379*	19.255	19.5726	19.1232	20.5645	20.0286	19.0375	19.8504	20.3462	19.7542	19.7926	19.7849	19.5927	1.22222	0.825571	0.991055	0.526482	0.763332	1.57074	0.829269	0.518164	0.846835	0.61583	0.800071	1.11716	1.01295	0.953518	0.731422	0.844353
rno-miR-381	19.3816	19.1099	18.8092	20.4133	19.784	19.1445	20.3142	19.6302	18.8086	19.6692	19.7762	19.5034	0.963377	0.979041	1.06024	0.503107	0.778223	1.25505	0.517407	0.732431	1.40362	0.577257	0.692662	1.02273	1.00088	0.84546	0.884487	0.764216
rno-miR-382*	22.5286	18.8402	15.4433	19.7726	19.9498	19.1197	19.6828	20.8187	18.8427	18.5843	19.8245	18.5545	0.0971486	1.0543	9.76332	0.700673	0.619661	1.14049	0.715907	0.287054	1.22443	1.0938	0.598349	1.76348	3.63826	0.820276	0.742462	1.15187
rno-miR-409-3P	15.7012	14.8771	14.8368	15.8124	15.8683	15.8228	13.5676	15.2039	15.164	14.8793	15.7562	14.8895	0.792631	1.18129	1.068	0.783491	0.753738	0.805262	3.56542	1.01064	1.12649	1.02479	0.721131	1.60708	1.01397	0.78083	1.90085	1.11767
rno-miR-598-5p	18.4078	23.925	22.4749	24.8389	25.9727	23.3436	24.8345	24.4743	23.6415	24.5051	24.0258	23.9034	10.7211	0.197056	0.473336	0.132651	0.06045	0.387154	0.127756	0.144491	0.279043	0.114526	0.206322	0.274487	3.79717	0.193418	0.183763	0.198445
rno-miR-664	15.3099	14.4941	14.4956	15.1584	14.7547	15.2966	15.1997	14.7314	15.3241	14.7091	15.2362	14.7874	0.803382	1.19053	1.04553	0.952726	1.26042	0.896228	0.88895	1.08363	0.779124	0.891131	0.799155	1.3331	1.01315	1.03646	0.917235	1.0078
rno-miR-7a*	14.2531	14.1463	13.8751	15.2093	14.6402	14.787	14.3298	14.7544	14.3623	13.9561	14.932	13.718	1.04679	0.948893	1.00675	0.576011	0.854608	0.799132	1.0175	0.667942	0.950446	0.940605	0.617983	1.75215	1.00081	0.74325	0.878629	1.10358
rno-miR-99a*	21.1416	22.0805	21.6415	22.819	23.5115	22.2996	23.7838	22.7241	22.03	21.5738	22.7245	22.6976	1.6326	0.716876	0.854428	0.544969	0.33721	0.808691	0.268085	0.492388	0.863716	0.884979	0.515081	0.64136	1.06797	0.563623	0.541396	0.680473
Average Ct values	19.0246	18.7761	18.5903	19.119	18.9577	19.169	19.0603	18.8777	18.9945	18.5733	18.9432	19.2326

## Sheet: excluded miRNAs
microRNAs	Ct values												Fold change values												Average fold change
Target Name	WT ctrl 1	WT ctrl 2	WT ctrl 3	KO ctrl 1	KO ctrl 2	KO ctrl 3	WT post SE 1	WT post SE 2	WT post SE 3	KO post SE 1	KO post SE 2	KO post SE 3	WT ctrl 1	WT ctrl 2	WT ctrl 3	KO ctrl 1	KO ctrl 2	KO ctrl 3	WT post SE 1	WT post SE 2	WT post SE 3	KO post SE 1	KO post SE 2	KO post SE 3	WT ctrl	KO ctrl	WT post SE	KO post SE
hsa-let-7d		14.8038	15.2591	16.371	15.5297	16.0969	15.453	15.3733	14.9767	14.8155	15.8357	15.8187	1216.52	0.0358043	0.0229585	0.0153244	0.0274564	0.019185	0.0278024	0.0258882	0.0369506	0.0308571	0.019661	0.024314	405.528	0.0206552	0.0302137	0.024944
hsa-miR-122		23.7948	24.6313	26.2143	23.9118	27.9033	23.5335	24.4731	24.0848	23.7361	22.1427	25.3244	84672.2	0.00489771	0.00241138	0.00116116	0.00572802	0.000372827	0.00714848	0.00328402	0.00466038	0.00443222	0.0172834	0.00232789	28224.1	0.00242067	0.00503096	0.00801452
hsa-miR-126*		13.7783	12.7548	14.3819	13.9779	16.3288	14.7828	13.8764	13.3061	13.8819	14.1624	14.7197	538.179	0.0322449	0.0576251	0.0269151	0.0356119	0.00722667	0.0195717	0.0323227	0.0520409	0.0260745	0.0277401	0.02304	179.423	0.0232512	0.0346451	0.0256182
hsa-miR-143		21.1392	20.4712	20.8458	20.8511	21.8478	22.2454	21.8231	21.0916	20.7798	21.666	21.2534	17532	0.00638995	0.00892631	0.00993243	0.00989593	0.00513425	0.00361477	0.00426817	0.00768384	0.00712264	0.00497979	0.00810094	5843.99	0.00832087	0.00518893	0.00673445
hsa-miR-143		15.7654	14.716	15.8013	15.8347	15.6402	17.0585	15.7411	15.1536	15.7862	16.3545	16.3493	1339.99	0.0202519	0.0368494	0.0250543	0.0244806	0.0290014	0.0100639	0.0220985	0.036004	0.0173434	0.0151146	0.01854	446.683	0.0261788	0.0227221	0.0169994
hsa-miR-146a		12.7853	11.8327	13.7491	13.5215	13.0797	12.013	12.8165	12.2564	11.8385	13.5318	12.413	345.75	0.0412287	0.0701517	0.0268109	0.0313926	0.0441424	0.0857526	0.043293	0.0692075	0.0690515	0.0275931	0.0732343	115.287	0.0341153	0.0660844	0.0566263
hsa-miR-188-5p		19.9523	18.9808	20.7664	21.6093	20.7771	22.5247	19.8687	19.3348	18.9897	20.5034	19.2327	9444.77	0.00783694	0.0135102	0.00565348	0.00315196	0.00580957	0.00160451	0.00891082	0.0139885	0.0132701	0.00600555	0.0177091	3148.26	0.00487167	0.00816793	0.0123283
hsa-miR-189		22.814	21.5449	23.2794	22.9609	22.7867	16.5497	23.1272	22.2075	22.5759	22.7269	22.2539	33084.8	0.00377686	0.00800279	0.00346949	0.00432673	0.00505385	0.353541	0.00326185	0.00669042	0.00387026	0.00450465	0.00764134	11028.3	0.00428336	0.121164	0.00533875
hsa-miR-203		17.9174	16.9675	18.1787	17.753	18.5427	18.7013	17.364	17.3116	16.8154	17.9076	17.8222	3706.58	0.0126044	0.0214045	0.013338	0.017915	0.0107288	0.00891428	0.0198468	0.0223153	0.0235064	0.0142476	0.0184755	1235.54	0.0139939	0.0170255	0.0187432
hsa-miR-210		17.7258	16.8363	18.6979	17.92	18.5202	18.3948	17.6499	17.168	16.9717	17.4681	17.7928	3440.19	0.0133598	0.021758	0.00863741	0.01481	0.0101143	0.010232	0.0151088	0.0228787	0.0195765	0.017934	0.0175005	1146.74	0.0111872	0.0160731	0.018337
hsa-miR-30e		13.9458	13.7421	14.3936	14.7947	14.8701	13.0001	14.7109	13.7059	13.1933	14.6918	14.1586	702.746	0.0374888	0.0379577	0.0348613	0.0263994	0.0259383	0.0879316	0.0236699	0.0515061	0.0548749	0.025097	0.0443891	234.274	0.0290664	0.0543692	0.0414537
hsa-miR-320		17.8472	17.2749	19.0759	17.4878	16.7374	17.6405	17.0666	17.1685	16.2372	17.6414	17.1835	3915.34	0.013978	0.0182719	0.00756456	0.0227428	0.039608	0.0196432	0.0257638	0.0260292	0.0370699	0.0181001	0.030384	1305.12	0.0233051	0.0238121	0.028518
hsa-miR-330-5p		20.7946	20.1317	21.2455	20.9971	21.1788	21.0057	20.7567	20.7777	20.4224	21.298	21.831	14968.8	0.00692802	0.0096428	0.00642809	0.00763589	0.00696988	0.00728806	0.00763135	0.0081547	0.00779086	0.0054873	0.00463492	4989.62	0.00701129	0.00769137	0.00597103
hsa-miR-331		13.7512	13.089	16.1882	14.1381	14.1431	14.4936	13.585	13.4318	12.2923	14.0256	14.367	577.751	0.0352715	0.0490722	0.00826136	0.0342132	0.0352958	0.0256746	0.0424662	0.0512025	0.0842452	0.0327431	0.0315844	192.612	0.0259235	0.0397811	0.0495242
hsa-miR-338		18.3678	17.7839	15.0651	19.0845	19.2439	10.0645	19.1833	18.1633	18.7435	18.6776	19.4599	4966.85	0.0123608	0.0162881	0.154693	0.00953936	0.00884259	4.7547	0.00753616	0.0165696	0.00827687	0.0111958	0.00795611	1655.62	0.0576918	1.59294	0.00914293
hsa-miR-33a*		20.4055	19.6619	21.3641	20.7339	21.2832	21.7403	20.9574	20.3796	20.5052	21.1244	20.4638	12274.4	0.00743928	0.0109513	0.00485508	0.0075149	0.00531635	0.00359159	0.00544493	0.00881206	0.00603201	0.00507499	0.00980394	4091.49	0.00589544	0.00594953	0.00697031
hsa-miR-370		16.271	15.8368	16.7583	16.7786	16.7604	16.6496	16.0736	15.7815	14.8855	16.7143	16.6887	1951.24	0.0207717	0.0246728	0.0187926	0.0185303	0.0194266	0.0194562	0.0255551	0.0339272	0.0471497	0.017152	0.021337	650.429	0.0189165	0.0263128	0.0285463
hsa-miR-449		22.1052	19.8065	23.8363	22.2726	23.05	23.737	21.2316	20.191	21.6373	22.7832	20.7205	18795.7	0.00350712	0.0151702	0.00133986	0.00396082	0.00239225	0.00137806	0.00689493	0.0153784	0.00421424	0.00246106	0.0125664	6265.23	0.00256431	0.00788381	0.00641388
hsa-miR-542-3p		23.7582	23.8961	24.7781	25.7305	25.7799	25.437	23.2776	23.9206	24.4388	24.1229	26.4412	70843.6	0.00420311	0.00335837	0.002629	0.00135863	0.00135913	0.00159875	0.00629278	0.00436929	0.00227842	0.00366514	0.000898095	23614.5	0.00178226	0.00408694	0.00228055
hsa-miR-708		15.2681	14.758	15.5155	15.6581	15.9506	15.4148	15.0593	14.7961	13.7204	15.548	15.5566	1206.23	0.0257323	0.0322175	0.0274932	0.0249061	0.0210525	0.0283071	0.031911	0.0415229	0.0653598	0.0237976	0.0289112	402.096	0.024484	0.0339137	0.0393562
hsa-miR-744		15.7614	15.0781	16.1894	16.0734	16.5345	15.79	15.2958	14.8748	14.4419	15.8226	16.1715	1455.62	0.0220593	0.031143	0.0207959	0.0225372	0.016949	0.0263356	0.0326868	0.0474505	0.0478346	0.0237403	0.0227809	485.225	0.020094	0.035491	0.031452
hsa-miR-873		24.8895	23.2305	24.057	24.8185	24.5545	27.438	24.0224	23.2555	10.5099	23.6156	24.7685	78891.6	0.00213676	0.00593217	0.00482609	0.00284673	0.00353894	0.000444783	0.00418197	0.00771565	39.5719	0.00580119	0.00318866	26297.2	0.00373725	0.00411413	13.1936
hsa-miR-874		17.3299	16.8278	16.4291	17.1594	16.5285	13.1336	16.5296	16.9157	12.0123	17.1937	17.8292	3133.31	0.0160102	0.0199343	0.037913	0.0228526	0.0366376	0.357419	0.0299152	0.0248209	0.554734	0.0197557	0.0155416	1044.45	0.0324677	0.137385	0.196677
hsa-miR-9*		11.856	11.7695	11.7213	12.1008	11.9752	11.7543	12.458	12.0755	12.3976	12.1406	12.0119	274.889	0.0624268	0.0582736	0.0869244	0.0668173	0.0754661	0.0815683	0.0441287	0.0623766	0.0372609	0.0575418	0.0768842	91.6699	0.0764026	0.0626912	0.0572289
mmu-miR-17*		23.8354	21.8442	23.3663	23.1958	23.6474	23.8416	21.7724	23.5771	22.7527	21.865	22.8324	44890	0.00252463	0.00882373	0.00443245	0.00498846	0.00377631	0.00306118	0.0113195	0.00351288	0.00464577	0.0111078	0.0069428	14963.4	0.00439907	0.00596452	0.00756547
mmu-miR-1896		13.0319	12.3883	15.1601	13.7499	12.3259	12.6328	16.8313	17.6672	14.3525	15.6003	17.5552	416.148	0.0418282	0.0574491	0.0121354	0.0322524	0.0895914	0.0671703	0.00322362	0.00195803	0.0145503	0.00791766	0.00249593	138.749	0.0446597	0.0241173	0.00832131
mmu-miR-1897-5P		10.8127	11.2685	10.9201	10.8294	11.058	11.0022	11.2747	13.5878	10.4352	11.5492	12.1386	192.399	0.0900475	0.0577199	0.106016	0.112893	0.0997439	0.0961585	0.0701443	0.0153041	0.101634	0.0606803	0.0492905	64.1822	0.106218	0.0605356	0.0705349
mmu-miR-1943		22.3252	24.5486	24.1341	22.299	24.6356	23.8931	23.1284	24.9388	22.8063	24.5557	24.8213	59153.3	0.00947617	0.00178397	0.00343023	0.0122394	0.00250846	0.00389229	0.00582688	0.00180128	0.00589865	0.00226721	0.00230488	19717.8	0.00605936	0.00384015	0.00349025
mmu-miR-1944		20.6693	19.8354	21.421	20.9546	21.7169	20.583	20.4581	20.1932	20.362	21.1645	20.6894	13579.5	0.00685515	0.0107423	0.00516368	0.00713448	0.00435439	0.0088622	0.00851531	0.0110933	0.00737011	0.00546051	0.00927671	4526.52	0.00555085	0.00949028	0.00736911
mmu-miR-1969		23.3674	23.6781	24.7419	25.6563	24.5852	25.8992	23.692	23.6873	23.1743	24.625	23.7139	61547.4	0.00478766	0.00339365	0.0023421	0.00124264	0.00270279	0.00100817	0.00410223	0.00446218	0.00475548	0.00224825	0.00516722	20515.8	0.00209584	0.00319086	0.00405698
mmu-miR-297a*		20.9716	21.0912	21.7268	20.7628	20.5333	20.6114	21.6448	22.2814	20.7085	21.5798	21.4383	19463.7	0.00796801	0.00644799	0.00598764	0.0116797	0.0141761	0.0124548	0.00536151	0.00373924	0.00830808	0.00586888	0.00791174	6487.91	0.0106145	0.00718518	0.0073629
mmu-miR-301b		15.8464	16.1302	17.5489	16.6913	18.319	17.3462	17.0539	16.3146	17.6894	16.8494	17.4019	1892.99	0.0270465	0.0195318	0.0105403	0.0190992	0.00639818	0.011646	0.0125669	0.0227463	0.00655036	0.0151522	0.0126262	631.011	0.0120126	0.0156531	0.0114429
mmu-miR-325		22.2576	21.7766	23.3267	23.3219	23.3163	23.0139	22.3889	22.6833	22.4771	21.9573	23.2825	30693.3	0.00515301	0.0063226	0.00311492	0.00312535	0.00324806	0.00371494	0.00504808	0.00446302	0.00384521	0.00712421	0.00347479	10231.1	0.00316278	0.00440868	0.00481474
mmu-miR-340-5p		15.6493	15.2996	16.2669	16.381	16.8362	16.6965	15.8278	15.2601	13.0445	16.4675	16.7458	1492.87	0.024453	0.0273933	0.0202134	0.0186756	0.0141029	0.0144098	0.0231838	0.037257	0.129235	0.0155713	0.0156919	497.642	0.017664	0.0249502	0.0534993
mmu-miR-376b*		14.7603	14.6741	15.106	15.1939	15.3731	14.8346	15.6344	15.1	14.7124	15.5724	15.3524	1052.08	0.0319131	0.0297841	0.0318513	0.0299686	0.0274015	0.0369105	0.0186819	0.0293385	0.028663	0.0204073	0.0290502	350.712	0.0297405	0.0283103	0.0260402
mmu-miR-434-3p		11.7701	11.8484	14.7733	12.2766	12.6276	12.9639	12.0698	12.0822	12.3736	12.6663	12.9322	274.449	0.0661488	0.0550828	0.0104641	0.0590591	0.0479366	0.0352129	0.0576628	0.0619883	0.0378242	0.0399054	0.040562	91.5236	0.0391532	0.0516213	0.0394306
mmu-miR-466G		18.6268	19.358	19.3368	18.5983	19.7481	18.5184	19.2326	19.8723	18.8192	19.1399	20.2062	7586.25	0.0157768	0.00835516	0.0122324	0.020409	0.00952238	0.0207105	0.0111234	0.00774132	0.011996	0.012412	0.00724402	2528.76	0.0140546	0.0131917	0.0105507
mmu-miR-467*		18.8755	19.0411	17.8819	20.1274	20.6842	20.9889	19.4888	18.7858	18.025	16.0791	20.0826	7467.6	0.0130706	0.0102453	0.0330083	0.00696076	0.00489887	0.0036785	0.00916798	0.0161821	0.0204774	0.101949	0.00776857	2489.21	0.014956	0.00967618	0.0433984
mmu-miR-488		20.3444	20.1095	19.8284	20.7472	21.7209	22.1383	20.8064	20.336	17.6821	20.9761	21.7939	13420.9	0.00848626	0.00878018	0.0153917	0.00814133	0.00429161	0.0029803	0.00661069	0.00993064	0.0466737	0.00614982	0.00426378	4473.63	0.0092749	0.00650721	0.0190291
mmu-miR-665		21.3884	21.499	22.5076	20.2997	23.0602	21.3848	21.3653	21.5953	21.7766	21.4315	23.2434	23548.8	0.00722151	0.00588036	0.00421636	0.0194799	0.00297607	0.00881617	0.00787381	0.00727903	0.00479394	0.00786956	0.00273923	7849.59	0.00889078	0.00798967	0.00513424
mmu-miR-666		20.2979	19.113	20.2434	20.4409	20.9907	19.7651	18.6945	19.6374	20.0229	19.9367	20.7763	10547	0.00688735	0.0137663	0.00907196	0.00791139	0.00559476	0.012134	0.0224556	0.0126651	0.0072406	0.00993304	0.00678358	3515.69	0.00752604	0.0157516	0.00798574
mmu-miR-669C		25.6904	25.6491	25.5131	26.7842	23.8467	24.8215	25.7067	25.5729	25.385	25.022	26.5969	165994	0.00258052	0.00233454	0.00370111	0.00153348	0.0121618	0.00573931	0.0027378	0.00325712	0.00277077	0.00460488	0.00188907	55331.2	0.00579879	0.00391141	0.00308824
mmu-miR-673-3p		19.2169	18.6529	19.9456	19.6203	19.3374	18.3255	19.1408	19.4205	18.982	19.2317	19.0713	7387.3	0.0102054	0.0132644	0.0078107	0.00978662	0.0123265	0.0230539	0.0115432	0.01031	0.0104344	0.0113414	0.0154913	2462.44	0.0099746	0.0149691	0.0124224
mmu-miR-676		16.8176	17.0055	18.5298	17.3	17.5141	16.982	16.9825	16.7397	16.4097	17.0342	17.338	2900.16	0.0211368	0.0163132	0.00818131	0.0191884	0.0171254	0.0229665	0.0202291	0.0259542	0.0243645	0.0204224	0.0202208	966.732	0.0148317	0.02305	0.0216692
rno-miR-350		20.4992	19.3077	21.3908	20.9932	20.1309	23.7215	20.1496	19.721	20.6738	20.1889	20.1297	11557.4	0.00656439	0.0131809	0.00448772	0.0059119	0.0111263	0.000856518	0.00897498	0.0130975	0.00505323	0.00913923	0.0116372	3852.47	0.0071753	0.00764299	0.0086099
rno-miR-551B		17.7677	17.4399	18.0266	17.751	18.0877	16.5238	18.7266	17.7709	18.0519	17.9513	17.969	3993.46	0.0150648	0.0166221	0.0159677	0.0193283	0.0158453	0.0434475	0.00831525	0.0174868	0.0107479	0.014893	0.0179788	1331.16	0.0170471	0.0230832	0.0145399
rno-miR-7*		12.7899	12.6023	12.7931	13.477	13.7518	10.7848	13.347	13.0364	12.9415	13.7432	12.6526	413.471	0.0491478	0.0492097	0.0621982	0.0387179	0.0331293	0.240257	0.0358438	0.0481978	0.0384425	0.0284997	0.0741749	137.856	0.0446818	0.108099	0.047039
mmu-miR-669H-5P	26.5175	25.7576		25.7886	26.2513	26.8308	26.8284	25.2919	26.1744	25.7706	26.0895	25.9395	0.0021449	0.00305742	152488	0.00379544	0.00275407	0.001908	0.00177245	0.00453054	0.00266449	0.00263253	0.0027273	0.00369839	50829.4	0.00281917	0.00298916	0.00301941
rno-miR-409-5p	21.5627	20.6573		22.49	21.7685	21.6701	22.428	21.3839	21.0673	21.518	23.1153	22.204	0.00651583	0.0102744	14937.4	0.00365824	0.0060321	0.0066856	0.00366679	0.00666217	0.00899589	0.00491563	0.00209951	0.00482558	4979.13	0.00545865	0.00644162	0.0039469
rno-miR-547			21.0821	20.5875	16.6934	17.8916	18.6661	20.9805	24.2546	18.1839	18.0542	20.7609	152.74	128.577	5.09196e-05	0.0001035	0.00153879	0.000694268	0.000376426	6.66802e-05	7.47366e-06	0.000375148	0.000530386	9.92981e-05	93.7722	0.000778854	0.000150193	0.000334944
mmu-miR-214	19.988	20.0487	20.4169	20.1341	20.5236		20.2111	19.4924	19.7226	20.3672	19.432	20.5347	1.31106	1.05824	0.720766	1.26497	0.965719	1.50698e+06	1.15147	1.66971	1.54341	0.737301	1.82186	1.03679	1.03002	502326	1.45486	1.19865
mmu-miR-667	19.0549	17.6452	17.7069	17.6343	17.7093		18.0541	18.1249	16.5345	17.3036	17.9585	18.4574	0.619135	1.38473	1.1664	1.76962	1.67998	372713	1.27008	1.06554	3.47907	1.52452	1.25123	1.08212	1.05676	124239	1.93823	1.28596
mmu-miR-668	18.519	18.2662	18.4077	18.5655	18.5443		18.8174	18.5216	18.3667	18.3312	18.5315	22.4526	1.0764	1.07966	0.860479	1.11282	1.12929	446926	0.897245	0.970506	1.17156	0.896719	1.00858	0.0813696	1.00551	148976	1.0131	0.662224
mmu-miR-715	16.3245	14.8585	18.7669	19.1839	16.5545		18	18.0639	16.021	18.6033	19.7589	18.751	1.46718	3.412	0.19976	0.215851	1.33557	133083	0.470832	0.396879	1.77325	0.221124	0.12827	0.315242	1.69298	44361.5	0.880322	0.221545
rno-miR-17-3p	19.7581	19.1599	19.6257	23.0816	20.409		20.7115	19.971	20.0474	20.7377	20.7531	22.9784	0.989032	1.26028	0.802272	0.10548	0.672486	969306	0.523566	0.770763	0.79259	0.366818	0.468993	0.122583	1.0172	323102	0.69564	0.319464
hsa-miR-100	23.2674	13.5257	13.246		13.824	14.1629	14.5022	13.7775	13.4838	12.5499	14.2413	14.5331	0.0121735	8.77334	9.36306	131232	9.04923	7.40668	5.42978	7.90627	10.5076	14.9913	5.99847	5.98872	6.04952	43749.5	7.94789	8.99284
hsa-miR-130a	14.5488	16.1831	16.436		16.8597	16.7312	17.1476	17.2439	16.3697	16.5048	17.0191	17.8006	2.64154	0.716331	0.528481	67597.7	0.568408	0.643246	0.447025	0.368445	0.73228	0.497965	0.450544	0.320345	1.29545	22533	0.515917	0.422951
hsa-miR-199a-3p	18.0886	19.7406	19.81		19.7744	20.6421	21.1512	19.7857	19.7806	15.3258	20.0422	20.8106	2.55272	0.683771	0.572909	759706	0.847151	0.480602	0.313199	0.71108	0.773712	12.6713	0.622868	0.446926	1.2698	253236	0.59933	4.58037
hsa-miR-19b	15.1165	12.4566	11.835		12.7793	13.0448	13.389	12.6568	11.8968	11.1724	13.1374	13.3118	0.296705	1.57854	2.13511	11253.5	1.60074	1.37862	1.00722	1.47423	2.70697	3.34011	1.10562	1.1974	1.33678	3752.14	1.72947	1.88104
hsa-miR-205	26.8136	26.4755	24.4488		26.6243	25.7066	27.901	25.644	27.2735	26.091	26.6916	26.64	0.627004	0.667245	2.39026	7.89619e+07	0.763322	1.49278	0.302483	1.27406	0.446462	0.756738	0.644939	0.816909	1.22817	2.63206e+07	0.674334	0.739528
hsa-miR-302a	23.0203	24.5067	26.2577		24.5887	21.2309	25.4799	24.6232	23.4792	27.836	20.1531	25.532	3.48742	1.04778	0.273669	3.16772e+07	1.2555	13.325	0.649934	1.03705	2.48482	0.0905704	24.05	0.706398	1.60296	1.05591e+07	1.3906	8.28231
hsa-miR-410	16.6977	14.1349	13.7562		14.6097	14.72	15.1204	14.2203	13.9773	13.8158	14.7314	14.5607	0.328241	1.6326	1.86607	37250	1.48996	1.42891	1.00409	1.65104	2.11862	1.76961	1.21226	1.66767	1.27564	12417.6	1.59125	1.54984
mmu-miR-124a	15.1586	14.2983	13.7379		14.6485	15.5817	14.9562	14.2247	13.7052	13.7567	14.6583	15.3202	0.691233	1.05633	1.36955	26993.1	1.05105	0.569821	0.815325	1.19281	1.85388	1.33597	0.924149	0.713861	1.03904	8998.24	1.28734	0.991326
mmu-miR-1897-3P	16.7894	22.9057	14.828		22.8274	22.7791	20.1074	19.9419	22.7032	22.4514	21.8208	23.1935	3.05787	0.0371055	8.81339	369811	0.049688	0.0531892	0.314332	0.310622	0.0496766	0.0441725	0.0883718	0.041708	3.96945	123270	0.224877	0.0580841
mmu-miR-499	27.9172	26.2516	25.5593		26.6422	27.8629	26.7548	19.1633	26.0962	26.34	24.6588	26.8564	0.462137	1.23423	1.75321	1.25063e+08	1.19403	0.530409	1.06038	180.212	1.59913	1.0086	4.17989	1.11363	1.14986	4.16875e+07	60.9572	2.10071
mmu-miR-666-3p	11.2326	19.7266	18.9749		20.6057	21.3215	19.7079	19.9049	19.8977	19.6593	19.8176	20.354	49.8551	0.116406	0.172312	128084	0.0802726	0.0505987	0.143603	0.110381	0.120283	0.105965	0.122706	0.1034	16.7146	42694.7	0.124756	0.11069
mmu-miR-669N	23.3194	22.765	24.8334		22.3228	22.7664	22.1821	18.0378	22.2096	21.154	19.2493	23.336	1.46147	1.8067	0.378724	1.63333e+07	3.11334	2.36999	3.29557	51.3477	3.0891	4.7951	23.2025	1.66894	1.21563	5.44443e+06	19.2441	9.88885
hsa-let-7i		13.1685	13.1342		13.7349	13.7735	13.3609	13.7537	13.0079	13.5058	13.7201	14.3538	510.281	0.0466552	0.042004	544.813	0.0399614	0.0402768	0.0497207	0.0333679	0.0606729	0.0320848	0.0357404	0.0281531	170.123	181.631	0.0479205	0.0319927
hsa-miR-125a-5p		12.6945	12.141		13.1637	13.9458	13.7606	12.7265	12.6599	12.3812	13.4457	13.0477	363.57	0.0461711	0.059572	388.174	0.0423019	0.025466	0.0268539	0.0484536	0.0550185	0.0498435	0.030799	0.0495979	121.225	129.414	0.043442	0.0434135
hsa-miR-183*		25.1486	22.4421		24.4304	24.4348	25.458	23.8719	25.2141	25.6603	22.3993	24.4418	69810.2	0.00157991	0.00906667	74534.5	0.00329655	0.00340251	0.00155269	0.0041073	0.00175659	0.000962844	0.0119281	0.00353864	23270.1	24844.8	0.00247219	0.00547653
hsa-miR-200c		20.2984	20.0041		20.7726	21.1166	22.3759	19.1924	20.7767	21.8966	23.4678	21.0333	12959.6	0.00845996	0.00912097	13836.6	0.00772399	0.00630026	0.00244092	0.0195391	0.00706489	0.00242771	0.00105581	0.00697548	4319.86	4612.2	0.00968162	0.00348633
mmu-miR-380-3p		25.3002	25.2598		25.6524	24.9461	25.3868	26.4338	24.346	25.2913	24.361	25.8889	138632	0.00282466	0.00255371	148013	0.00280654	0.00474052	0.00323922	0.00138134	0.00636666	0.00246928	0.00608094	0.00257727	46210.5	49337.7	0.00366241	0.00370916
mmu-miR-582-3p		26.0393	25.8872		26.9077	26.0103	26.8319	25.7662	25.0348	25.7014	26.3258	26.2528	190102	0.00232055	0.00226684	202967	0.00161208	0.00310882	0.00163136	0.00300884	0.00541644	0.00254819	0.00213613	0.00274615	63367.3	67655.6	0.00335221	0.00247682
rno-miR-346		20.1745	18.8876		20.5805	19.7647	20.635	15.1396	19.8069	22.7312	19.7853	20.667	9730.29	0.00692148	0.0148483	10388.8	0.0066253	0.0120737	0.00612533	0.243485	0.0103895	0.0010221	0.0101783	0.006751	3243.44	3462.93	0.0866667	0.00598379
hsa-miR-28-3p	11.163		11.2961		12.3156	12.5201	14.1625	13.7626	15.2441	13.9555	10.6562	16.2686	0.0915636	176.745	0.0617918	224.168	0.0439749	0.0395096	0.0117373	0.0136455	0.00529837	0.00966602	0.122972	0.00307209	58.966	74.7504	0.0102271	0.0452367
rno-miR-450	26.8248	26.044	26.8277		26.0113		25.7312	20.953	24.8181	26.6941	27.314	27.3539	0.97826	1.41486	0.722493	1.24152e+08	1.8356	1.28529e+08	2.14002	51.7433	3.85003	0.783338	0.658687	0.783086	1.03854	8.42271e+07	19.2445	0.741704
hsa-miR-1	22.084	21.2904	21.9741	21.0467	21.7746	21.7448		19.7229	21.5218	25.4887	20.3239	22.0991	0.950255	1.38661	0.758934	2.08224	1.25722	1.32874	4.33078e+06	4.40979	1.37416	0.0656272	3.04219	1.08625	1.03193	1.55607	1.4436e+06	1.39802
hsa-miR-124*	23.3541	20.0086	19.7274	22.9289	19.1742	19.6418		21.2473	20.5213	19.9053	20.6771	20.2747	0.233823	2.00077	2.13754	0.335222	4.52477	3.38759	2.57006e+06	0.909733	1.63144	1.86741	1.41329	2.28302	1.45738	2.74919	856686	1.85457
hsa-miR-127-5p	19.6156	22.8914	20.8714	23.3666	23.1482	22.7899		22.9741	23.2342	22.9587	23.1794	22.8233	3.33606	0.289939	1.03386	0.264542	0.307778	0.408465	2.7471e+06	0.293775	0.26599	0.240431	0.26663	0.417091	1.55328	0.326928	915700	0.308051
hsa-miR-142-5p	25.8195	25.2326	23.8215	26.748	25.5907	25.6367		26.2428	24.8096	27.6709	24.6184	26.0478	0.64438	0.814719	1.90481	0.361461	0.806202	0.808405	3.9115e+07	0.434028	1.27085	0.130606	1.40027	0.635367	1.1213	0.658689	1.30383e+07	0.722079
hsa-miR-193a-3p	20.4866	24.5331	25.4473	25.7059	25.0727	25.4833		23.7732	24.8485	24.7884	24.1455	25.7375	9.38231	0.477981	0.222987	0.268902	0.417054	0.324822	1.41309e+07	0.868508	0.446894	0.347944	0.702093	0.284619	3.36109	0.336926	4.71031e+06	0.444885
hsa-miR-214	22.0085	20.289	19.4146	19.8271	19.9529	20.5313		20.2993	20.4842	20.4428	20.0196	19.7396	0.432186	1.19818	1.93112	2.09313	1.91827	1.33002	1.86927e+06	1.27651	1.21757	0.935709	1.62144	2.40612	1.18716	1.78047	623090	1.65442
hsa-miR-296-3p	21.8596	23.0301	23.2972	23.1036	21.1402	24.8126	22.2358		22.9128	23.6283	25.0965	24.7724	2.13901	0.799977	0.5844	0.964181	3.76018	0.305316	1.68941	7.3521e+06	1.00946	0.459102	0.214441	0.328097	1.17446	1.67656	2.4507e+06	0.33388
hsa-miR-504	19.783	20.7228	17.7824	21.9122	21.9572	21.4875		20.1502	20.7221	21.8286	17.104	16.5288	0.916338	0.40213	2.7138	0.223637	0.216768	0.310768	847449	0.641698	0.468056	0.162343	5.54678	10.0997	1.34409	0.250391	282483	5.26961
hsa-miR-539	16.0352	15.5489	15.1951	15.9155	16.135	15.2509		15.6674	15.0198	15.49	16.2187	15.7622	0.861823	1.01628	1.14174	0.999736	0.858645	1.64062	59328.3	1.00451	1.70617	0.919772	0.717266	1.20293	1.00662	1.16633	19777	0.946655
mmu-miR-1903	22.7683	24.3558	25.3026	23.4225	23.5748	24.0331		23.7062	24.6705	23.0537	24.238	23.5738	3.0347	0.850005	0.387671	2.05875	1.85246	1.39583	2.22238e+07	1.43084	0.795081	1.82113	1.03557	2.0056	1.42412	1.76901	7.40793e+06	1.62077
mmu-miR-1982.2	24.1854	18.6945	21.3442	22.2734	14.0756	15.8126		20.6616	18.6551	20.3129	15.202	20.5942	0.170777	6.46493	0.905747	0.686216	201.482	62.5735	3.33997e+06	1.77426	7.72966	1.82953	81.6999	2.37752	2.51382	88.2474	1.11333e+06	28.6357
mmu-miR-199b	26.4975	26.775	25.5113	26.335	27.0081	27.0959	26.6773		26.023	26.3385	26.7521	26.3648	0.994017	0.690333	1.4573	1.18781	0.744923	0.725685	0.899594	8.50621e+07	1.35261	0.811722	0.787498	1.25883	1.04722	0.88614	2.8354e+07	0.952684
mmu-miR-207	22.7399	18.9093	22.0405	16.1284	17.4027	20.4307		19.959	18.3808	11.5648	20.7904	19.9322	0.411098	4.92379	0.494032	42.9192	17.7441	2.2521	2.95203e+06	2.55203	8.26279	695.232	1.50082	3.3249	1.94297	20.9718	984012	233.352
mmu-miR-24-2*	17.4657	17.8976	17.7698	19.1871	18.3684	18.8588		18.767	18.6012	18.011	18.5667	18.4219	1.38792	0.866063	0.831931	0.449349	0.792589	0.584076	257527	0.508662	0.618683	0.695574	0.611526	0.826321	1.02864	0.608671	85842.8	0.71114
mmu-miR-322	21.4531	20.1507	19.8986	21.6215	20.1847	20.9339		20.6965	20.7518	20.1898	20.1176	21.5954	0.6051	1.25633	1.31543	0.574906	1.55636	0.958583	1.7809e+06	0.923417	0.96362	1.06237	1.4433	0.63335	1.05895	1.02995	593633	1.04634
mmu-miR-325	27.0842	22.4001	19.729	23.8696	21.8249	23.5791		25.8118	21.7484	22.4025	22.7946	24.3879	0.0725183	1.56929	8.78719	0.718765	2.96539	0.910097	1.05774e+07	0.158226	2.86833	1.36122	1.34045	0.542952	3.47633	1.53142	3.5258e+06	1.08154
mmu-miR-433-5p	25.0015	24.0566	25.7129	25.645	23.1249	24.7613	24.8018		24.798	23.8368	23.7116	24.4926	1.10938	1.79772	0.501413	0.758251	4.34929	1.44839	1.30603	3.3658e+07	1.25107	1.819	2.56371	1.82348	1.13617	2.18531	1.12193e+07	2.06873
mmu-miR-540-5p	10.5365	19.3153	21.0397	22.1433	19.8286	19.4991	21.3707		20.7148	21.1675	18.7133	23.1457	100.768	0.193134	0.0513828	0.0344956	0.171616	0.223258	0.0565826	135189	0.0851706	0.0464766	0.329129	0.0186299	33.6708	0.143123	45063	0.131412
mmu-miR-669a	13.8826	21.4719	20.508	20.387	23.7806	21.2646	20.0237		21.5272	27.6362	16.0502	24.2909	31.2503	0.136603	0.234253	0.367516	0.0349695	0.207078	0.453911	426330	0.152943	0.00165489	6.57443	0.0265633	10.5404	0.203188	142110	2.20088
mmu-miR-680	15.7275	19.1369	17.1491	16.7104	20.3706	21.1849		20.6076	20.8406	20.7631	20.7337	21.8589	3.57492	0.283235	0.987613	1.93119	0.152757	0.0899294	198830	0.109648	0.10116	0.0797173	0.105135	0.0589059	1.61526	0.724627	66276.7	0.0812527
rno-miR-219-1-3p	24.8251	24.5516	24.4232	15.7584	25.4337	24.8051		25.5075	25.7355	11.7143	25.3951	26.9258	1.0017	1.01922	0.979472	573.474	0.701387	1.12267	3.05216e+07	0.563812	0.521942	6480.64	0.637748	0.269776	1.00013	191.766	1.01739e+07	2160.51
rno-miR-24-1*	24.745	21.9878	19.8156	25.7828	22.5845	21.2748		21.5844	21.7011	22.3026	21.6885	22.2785	0.198243	1.12829	4.47076	0.103094	0.946292	2.4285	5.71435e+06	1.60119	1.60123	0.788091	1.55886	1.26567	1.93243	1.15929	1.90479e+06	1.20421
rno-miR-532-5p	18.9819	14.9496	14.9421	16.8135	15.649	15.5608		15.5737	14.7461	15.563	15.7104	13.9899	0.18135	2.49792	2.20752	0.870392	1.95099	2.14717	96253.6	1.739	3.34642	1.41865	1.6552	6.66636	1.62893	1.65619	32086.2	3.24674
mmu-miR-101a*		23.3409	22.8385	24.4948	23.1657	23.6279		18.5485	23.6221	23.0906	21.7793	23.3669	50385.3	0.00399213	0.00497155	0.0022755	0.00571697	0.00429622	51650.6	0.1187	0.00382195	0.00412548	0.0132305	0.00538033	16795.1	0.00409623	17216.9	0.00757877
mmu-miR-1195		14.2534	16.6892	17.0182	16.0503	17.0052		24.4475	17.826	17.4429	14.5893	16.4234	1490.69	0.0642543	0.0104402	0.0119901	0.0234538	0.0125258	1528.13	5.88519e-05	0.00628311	0.00611927	0.0571567	0.0195917	496.922	0.0159899	509.377	0.0276226
hsa-miR-126	10.1256	10.5026		10.7815	10.704	11.6072	11.5847	10.1889		10.1479	10.818	10.506	0.123111	0.0798041	101.784	0.0834227	0.0880268	0.0487265	0.0459024	0.106424	134.693	0.0886607	0.0720061	0.109249	33.9956	0.073392	44.9486	0.0899719
mmu-miR-696	20.9253	17.2638		19.2605	17.4589	18.5242		19.1331	18.6489	17.3827	17.5143	19.6982	0.00399374	0.0425421	5885.75	0.0135205	0.0471316	0.0233174	8152.68	0.0124941	0.0189496	0.0340381	0.0401529	0.0107994	1961.93	0.0279898	2717.57	0.0283301
hsa-miR-218				10.9133	10.5574	11.1394	10.4681	10.528		10.9153	10.7798	10.7359	1.17086	0.985636	0.866518	0.000648223	0.000829554	0.000573711	0.000847352	0.00071625	1.14669	0.000443432	0.000629444	0.000793045	1.00767	0.000683829	0.38275	0.000621974
rno-miR-666	23.6315	18.4875	19.9305	17.7961	17.831			21.7262	20.6735	18.3006	16.889	22.2579	0.151692	4.51529	1.46	9.24807	9.02692	2.17896e+06	2.02086e+06	0.51324	1.15442	4.46569	15.3518	0.454048	2.04233	726326	673620	6.75717
hsa-miR-302d	25.6579	25.7948	25.6234	24.7499		26.8212		23.5899	25.1924	24.7974	26.4337	27.2806	1.1989	0.917854	0.908748	2.40199	6.77669e+07	0.591674	6.50655e+07	4.5407	1.62126	1.59205	0.66184	0.449698	1.0085	2.2589e+07	2.16885e+07	0.901197
mmu-miR-1894-5P	21.1584	20.5052	18.7912	20.2863		24.2634	21.8202	23.0926		20.2349	19.1862	23.555	0.582678	0.771391	2.22483	1.13865	1.45605e+06	0.074855	0.377544	0.137712	1.33561e+06	0.808324	2.16086	0.127819	1.19297	485351	445202	1.03233
hsa-miR-15b*	23.1171	20.4045	20.6442		18.4387	22.3205		18.6109	21.6215	19.1542	17.8082	20.9938	0.35332	1.94974	1.45163	3.43208e+06	9.65969	0.678343	3.29527e+06	7.25233	0.975719	4.0298	13.2382	1.77827	1.25156	1.14403e+06	1.09842e+06	6.34874
mmu-miR-136*	25.6527	24.7771	21.6929		25.2074	25.3901		24.6757	25.1571	25.1087	22.2773	25.7306	0.383093	0.59168	4.41173	2.15762e+07	0.556939	0.507956	2.07161e+07	0.681126	0.528976	0.408531	3.75745	0.419263	1.7955	7.19208e+06	6.90538e+06	1.52841
mmu-miR-1948	18.9637	26.3993	24.5114		26.9196	27.13		21.8436	25.2424	25.8151	22.9459	25.4756	23.5123	0.114331	0.371999	1.28341e+07	0.101106	0.090462	1.23225e+07	2.885	0.296578	0.14892	1.40612	0.297595	7.99954	4.27805e+06	4.10751e+06	0.617546
mmu-miR-763		11.5299	10.6813		10.8228	11.7746		12.6024	11.471	11.873	15.4501	11.9085	198.267	0.0564447	0.0893564	211.685	0.116873	0.0625505	203.246	0.0287974	0.0684028	0.0386607	0.00418614	0.0595745	66.1378	70.6214	67.7812	0.0341404
mmu-miR-764-5p		19.5628	18.1064		18.1856	21.3687		20.4461	21.4233	19.3208	18.6529	20.7417	7052.79	0.00766612	0.0184954	7530.08	0.0252565	0.00287892	7229.9	0.00445953	0.0024561	0.00787717	0.0161723	0.00464641	2350.94	2510.03	2409.97	0.00956531
rno-miR-347		19.7926	20.1932		17.6334	21.3083		17.8115	19.918	22.3599	19.1227	23.0527	12045.2	0.011165	0.00743574	12860.4	0.0632504	0.00512691	12347.7	0.047295	0.0119078	0.00163669	0.0199442	0.00159911	4015.08	4286.81	4115.92	0.00772667
mmu-miR-501	16.6927	21.4501			24.5191			18.96	24.238	23.2079	25.8461	24.909	0.0742813	0.00231191	5823.03	8400.69	0.000349406	8696.83	8065.81	0.0139367	0.000389454	0.000593942	0.000123292	0.000288506	1941.04	5699.17	2688.61	0.000335247
mmu-miR-1960		24.9071			25.2802			14.266	20.557	17.7966	21.5689	21.3153	369.63	9.88991e-06	273.552	394.644	9.68529e-06	408.556	378.912	0.0169463	0.000234662	0.00118741	0.000112304	0.000163625	214.394	267.733	126.31	0.000487781
rno-miR-489	19.955	23.2954	17.2247					21.2686	23.917	21.0418	20.7657	22.2276	1.34813	0.112038	6.62068	1.46292e+06	1.46292e+06	1.51449e+06	1.4046e+06	0.489884	0.0847179	0.464217	0.726413	0.322291	2.69362	1.48011e+06	468201	0.504307
mmu-miR-1938	13.5265							22.7414	26.3924	26.0145	26.7677	26.7742	0.00225898	22.4395	19.7276	28.4603	28.4603	29.4636	27.3258	3.43364e-06	2.96362e-07	2.87603e-07	2.20514e-07	2.68291e-07	14.0564	28.7947	9.1086	2.58803e-07
mmu-miR-697	22.9356	22.7423		21.6707	14.4173		23.2231			23.6963	25.7944	19.952	0.00559335	0.00538368	33208.5	0.014351	2.18967	49597.6	0.00469768	40530.7	43945.7	0.00241453	0.000728766	0.0511048	11069.5	16533.3	28158.8	0.0180827
rno-miR-632	18.9999	17.784		21.0342	16.2511	16.477				18.6298	18.5098	20.6676	0.0109644	0.0214394	4254.05	0.00285788	0.0786876	0.0696521	5892.53	5192.05	5629.5	0.0103647	0.0145552	0.00398648	1418.03	0.0503992	5571.36	0.00963546
mmu-miR-196a*	14.2313	11.6633	10.6573		10.6269	11.3949				11.2409	10.1037	11.8038	0.283269	1.41402	2.49658	5816.85	3.67856	2.23623	5584.97	4921.04	5335.67	1.64644	4.68001	1.76031	1.39796	1940.92	5280.56	2.69558
hsa-miR-125b	11.4012	11.7802	11.728	10.828	12.0083	11.7495	11.347	11.8363	11.7475		11.9226	12.5301	1.37824	0.892183	0.813243	2.18935	0.966126	1.19668	1.46694	0.920785	1.06175	2726.38	0.907553	0.728023	1.02789	1.45072	1.14983	909.338
hsa-miR-133b	14.4936	20.6492	19.6953	20.2245	20.6817	20.7237	20.7628	21.1872	20.6908		19.8031	20.7334	16.1483	0.190689	0.324748	0.324624	0.236463	0.237774	0.214621	0.140921	0.215542	272447	0.384872	0.246819	5.55459	0.266287	0.190361	90815.8
hsa-miR-191	14.4704	10.7043	10.2235	11.578	11.0013	11.49	11.4353	10.5508	10.3579		10.9579	10.5012	0.18384	2.10564	2.5833	1.45744	2.17373	1.6037	1.54478	2.51287	3.11438	3052.27	1.98301	3.32612	1.62426	1.74496	2.39068	1019.19
hsa-miR-363	25.4261	21.1648	25.777	25.7603	25.584	23.9227	22.7068	26.0555	25.6143	26.318	26.4072		0.474365	7.65809	0.275275	0.40174	0.453967	1.48651	3.20249	0.276989	0.407755	0.186971	0.227129	2.47044e+07	2.80258	0.780739	1.29574	8.23479e+06
mmu-miR-1898	10.0978	13.2419	19.2745	21.0829	22.7295	25.4614	21.3436	23.4118	21.9404	20.8954		24.1365	20.175	1.92115	0.0258003	0.0106274	0.0033943	0.000528922	0.00851682	0.00178945	0.00537984	0.00829022	20895.9	0.00138477	7.37398	0.00485019	0.00522871	6965.31
mmu-miR-1904	16.6254	13.4547	14.5595	13.4092	11.8094	13.4868	13.4361	13.9937	11.2117	13.7857	12.8441		0.349186	2.64683	1.08197	3.46469	10.5016	3.39901	3.26509	1.95464	14.5775	1.82825	4.53777	40778	1.35933	5.78842	6.59909	13594.8
mmu-miR-1928	21.741	23.1171	21.5488	21.0646	21.8062	23.5756	19.8318	21.8403	24.9175	24.4639		24.1795	1.53922	0.499198	1.30144	2.62643	1.57079	0.47699	5.9264	1.29785	0.166735	0.170516	5.09907e+06	0.328003	1.11329	1.55807	2.46366	1.69969e+06
mmu-miR-350	20.2368	20.7624	20.509	22.0906	21.7079	21.8238	21.7467	20.941	20.518	20.8247	21.1696		1.40785	0.823266	0.862788	0.415876	0.542185	0.517977	0.506762	0.780497	1.13466	0.685064	0.697045	2.00945e+06	1.0313	0.492012	0.807305	669816
mmu-miR-455	20.33	21.0673	20.0995	23.5559	21.5632	21.7213	20.613	20.1158	21.7889		21.1799	21.7856	1.31632	0.664694	1.14292	0.150218	0.59783	0.554676	1.10902	1.37927	0.468944	1.26897e+06	0.690273	0.554371	1.04131	0.434241	0.985744	422989
mmu-miR-465b-5p	25.802	26.7	27.6235	27.9299	27.9077	26.6326	27.4099	25.375	27.3789	27.3004		26.1268	2.19472	0.991488	0.459551	0.53614	0.54445	1.36408	0.738125	2.66516	0.720497	0.568162	1.21357e+08	2.02419	1.21525	0.814889	1.3746	4.04524e+07
mmu-miR-466K	23.4113	21.481	21.378	21.6785	17.1649	22.84	21.5747	23.9026	21.8645	21.0033	23.4027		0.468596	1.50338	1.41949	1.66283	37.983	0.769558	1.7156	0.301088	1.34081	1.81892	0.445531	6.03838e+06	1.13049	13.4718	1.11916	2.01279e+06
mmu-miR-511	22.8151	18.2072	17.7159	19.4853	20.6245	25.811	19.9483	21.4244	20.7363	20.7812		23.8865	0.124299	2.5514	3.1532	1.33434	0.605818	0.0172223	0.929475	0.294377	0.514266	0.372296	866949	0.068324	1.94297	0.65246	0.579373	288983
mmu-miR-669D	25.1388	23.4293	21.7815	24.5216	21.548	24.1937	22.6733	20.4344	24.1617	24.073		23.3744	0.363154	0.999773	2.75428	0.594753	4.67168	0.77282	2.05611	8.55219	0.700131	0.556008	1.26803e+07	1.42518	1.3724	2.01308	3.76948	4.22675e+06
rno-miR-1	24.7811	21.6744	21.8268	20.3809	22.6661	22.4076	25.2277	21.7787	21.4742		22.2619	22.1082	0.288618	2.09289	1.6555	6.50692	1.33492	1.65317	0.217103	2.08913	2.79745	6.08604e+06	1.56383	2.12618	1.34567	3.16501	1.70123	2.02868e+06
rno-miR-421	17.2348	25.6453	22.1402	12.2478	25.7351	26.0845	25.353	23.3756	25.0226		22.1451	26.1041	25.3901	0.0628148	0.627009	859.724	0.0748621	0.0608332	0.0936722	0.325015	0.112528	2.86425e+06	0.798035	0.0627154	8.69331	286.62	0.177072	954750
mmu-miR-202		26.5881	25.6458	25.4726	26.1354	25.7942	26.0588	24.8397	25.6746		26.1922	27.9025	204093	0.00170301	0.0028771	0.00467991	0.00295609	0.00387702	0.00299305	0.00613945	0.00373198	149271	0.00251589	0.000939666	68031	0.00383768	0.00428816	49757
mmu-miR-297c		22.6708	23.9495	24.8364	24.3856	22.7848	23.9599	13.7051	23.6542	24.2552		25.3686	55788.5	0.00703328	0.00254857	0.0019883	0.00271765	0.00853339	0.00350493	3.77315	0.00413853	0.00203778	52728.7	0.00148756	18596.2	0.00441312	1.26027	17576.2
hsa-miR-138	23.9877	10.5398		10.5815	10.7751	10.2697	11.257	10.5104	10.4313		10.8051	10.1234	0.000205161	1.92984	2525.71	2.37788	2.07931	3.05578	1.42949	2.1134	2.42055	2496.08	1.80285	3.53416	842.547	2.50432	1.98781	833.806
mmu-miR-150*		24.438		24.4627	20.8328	24.9266	22.3251	21.1124	26.0257	22.6327		25.7	331.665	1.22836e-05	245.455	1.53153e-05	0.000189604	1.14958e-05	6.47045e-05	0.00013214	4.75475e-06	3.73006e-05	313.475	7.02856e-06	192.374	7.21385e-05	6.71998e-05	104.492
hsa-miR-147b	27.5449	24.8211	24.6117	27.8826	25.4949		26.4209	25.3592	25.6341	26.83	24.5362		0.316868	1.76201	1.79108	0.267701	1.40087	6.85786e+07	0.707938	1.30205	1.16682	0.380382	2.41034	7.16695e+07	1.28998	2.28595e+07	1.05894	2.38898e+07
mmu-miR-682	18.9583	21.0386	18.7357	21.5511	21.8248		20.6216	23.2587	19.8311	22.6849	18.4945		1.79853	0.358015	1.55303	0.318302	0.263297	1.01254e+06	0.582086	0.0824456	0.961833	0.0993662	2.34443	1.05817e+06	1.23653	337513	0.542122	352726
hsa-miR-132		10.4084	10.1621		10.8389	10.7963	10.6692	10.2629	10.1969		10.6459	10.7616	135.712	0.08406	0.087658	144.896	0.0791095	0.0843526	0.0854342	0.0997672	0.11324	99.2582	0.0800529	0.0902995	45.2947	48.3533	0.0994805	33.1428
mmu-miR-881*	25.8137	17.2036		18.2103	16.2153		18.6387	10.8406	20.4504	18.4079	25.3		0.000411444	0.135338	17958.5	0.0854279	0.340518	26821.4	0.0609476	11.9527	0.0165865	0.0510297	0.000555186	28030.3	5986.21	8940.61	4.01007	9343.45
mmu-miR-215	27.6115	26.0423	24.5734	22.7551			22.8271	25.936	27.057	27.5301		26.4582	0.403823	1.00875	2.45486	12.4895	8.84132e+07	9.15299e+07	11.4079	1.16512	0.580837	0.312503	7.82675e+07	1.03753	1.28914	5.9981e+07	4.3846	2.60892e+07
hsa-miR-590-5p			25.3714	26.4156			24.8342	20.3697	26.8989	24.281	25.14		411.488	346.392	7.01576e-06	4.90796e-06	439.334	454.821	1.41026e-05	0.000274337	3.22043e-06	1.47634e-05	1.05185e-05	475.321	252.627	298.052	9.72201e-05	158.44
hsa-miR-199a		25.7173			27.4747		27.9964	22.7061	27.1185		24.7871	27.8114	445.719	6.8015e-06	329.863	475.883	2.55153e-06	492.658	1.7064e-06	5.88358e-05	2.99589e-06	325.993	1.45517e-05	2.18589e-06	258.528	322.847	2.11794e-05	108.664
mmu-miR-1937C	10.6072					10.0712	10.2043	10.5023	10.6834		10.7669	10.2655	0.00870529	11.4308	10.0494	14.4979	14.4979	0.0139514	0.0117985	0.00845627	0.00808692	9.93147	0.00736537	0.0127426	7.16297	9.66991	0.00944722	3.31719
mmu-miR-764-3p		25.9261	24.7876				27.1238	26.3399	23.5411	26.593	27.1441		143647	0.00189653	0.00367067	153368	153368	158774	0.00100688	0.00152757	0.0115254	0.00103789	0.000915384	165930	47882.2	155170	0.00468663	55310.1
hsa-miR-204	15.7352	10.4279	10.2146	13.1843	10.5376	11.3034	11.2766	11.0038			10.6886	11.0078	0.0959366	3.19801	3.25939	0.600254	3.75891	2.28867	2.16244	2.30198	5125.14	3827.48	2.997	2.93582	2.18444	2.21595	1709.87	1277.8
mmu-miR-384-5p	11.3696	10.478	10.6944	11.01	11.7581	12.4701	11.0098	11.4604		10.763		11.4848	0.81525	1.2732	0.96341	1.11679	0.66496	0.42024	1.07246	0.691468	2112.64	0.907917	2038.86	0.869478	1.01729	0.733996	704.8	680.213
rno-miR-543	22.4686	25.1224	24.3838	25.8213	25.8006	24.9136		24.8682	25.0864	27.3208	24.7716		3.36503	0.450093	0.660251	0.351688	0.356765	0.683019	2.00203e+07	0.575997	0.536881	0.085208	0.644469	2.25595e+07	1.49179	0.463824	6.67345e+06	7.51985e+06
hsa-miR-674		19.6507	21.1783	15.7113	20.1592	20.0691		21.5831	19.4419		19.9525	21.3988	14635.8	0.0149689	0.00456448	0.291267	0.0133453	0.0147066	15003.4	0.00420798	0.0201264	10704.5	0.0136335	0.00611461	4878.62	0.10644	5001.13	3568.16
mmu-miR-92a*			21.0489	24.6213	25.5626	23.2336		21.019	23.71	25.7459		25.8039	151.573	127.595	5.17066e-05	6.2704e-06	3.26546e-06	1.69862e-05	155.379	6.44309e-05	1.08181e-05	1.97013e-06	143.26	2.98881e-06	93.0559	8.84068e-06	51.7931	47.7532
mmu-miR-1941-5P	23.1966	20.4949	27.4202	22.3324	20.5314		26.2168		23.477	26.8375	27.4946		1.66422	9.1145	0.0659258	3.2346	11.2707	1.76837e+07	0.210287	1.4451e+07	1.34202	0.0975735	0.0799643	1.84808e+07	3.61488	5.89458e+06	4.817e+06	6.16026e+06
mmu-miR-1957	26.1296	20.8202	19.5151	23.9691	15.5397		22.6268	20.9587		20.1339	23.2272		0.0744781	2.48607	5.40079	0.355496	122.551	6.04357e+06	0.865426	2.4234	5.35487e+06	3.47568	0.526308	6.31597e+06	2.65378	2.01457e+06	1.78496e+06	2.10532e+06
mmu-miR-292-3p	27.8391	26.8081	26.4316		24.8054	26.4057		27.9527	27.5371	27.2708	26.9289		0.666546	1.14651	1.30855	1.70868e+08	5.82781	1.9898	1.64056e+08	0.556459	0.804755	0.722856	1.18388	1.84864e+08	1.04054	5.69559e+07	5.46855e+07	6.16213e+07
rno-miR-327		23.8036	16.4723	24.4303	15.836		20.885		21.5245	24.7658	23.0399		12880.2	0.000740509	0.104845	0.000608291	0.235098	14236.6	0.00681859	11634	0.00418159	0.000330225	0.00141159	14878.3	4293.43	4745.61	3878.01	4959.42
mmu-miR-467a		14.1068	17.8019		14.7401	15.7773	15.1348	16.2162		14.3808		18.0219	1863.53	0.0889139	0.00603525	1989.64	0.0727049	0.0366746	0.0530976	0.0221099	1825.05	0.0638876	1761.32	0.00808791	621.207	663.248	608.375	587.13
rno-miR-344-5p		26.2608	22.8507		24.4938	27.1285		23.4356	24.4288	25.0402		22.1881	99202.7	0.00103857	0.00970601	105916	0.00448312	0.000747321	101694	0.00789768	0.00430204	0.00210295	93761.7	0.0239818	33067.6	35305.3	33897.9	31253.9
mmu-miR-466J	23.9515		16.9922		19.5143	21.2319		19.9286	19.7962	18.1654	17.0177		0.000926441	12651.7	0.0853167	16046.3	0.0214287	0.00674501	15406.6	0.0136029	0.0161669	0.0373891	0.107057	17360.7	4217.25	5348.77	5135.56	5786.94
mmu-miR-669M	18.6044	23.725	21.5548			21.1849		24.6583	23.6462	23.808		23.4953	7.55722	0.182869	0.723597	3.21586e+06	3.21586e+06	1.39652	3.08766e+06	0.102746	0.224683	0.15	2.84683e+06	0.294247	2.82123	2.14391e+06	1.02922e+06	948942
mmu-miR-1186		22.363	23.1115		22.1195			23.3731	23.9265		22.9924	23.6512	42812.5	0.00668098	0.00349614	45709.8	0.010032	47321.1	43887.6	0.00355946	0.00262982	31312.5	0.00484937	0.00375399	14270.8	31010.3	14629.2	10437.5
mmu-miR-1199		14.5544	14.4548		18.503			19.0498	18.4541		18.7656	18.2318	953.64	0.0333644	0.0314291	1018.17	0.00274066	1054.07	977.587	0.00158722	0.00260061	697.479	0.00202244	0.00357845	317.901	690.748	325.864	232.495
mmu-miR-1941-3P	22.6364	26.9604	22.8303				27.479	21.7152		25.1568		27.5827	3.32543	0.139767	2.15153	2.31477e+07	2.31477e+07	2.39637e+07	0.118807	5.68771	2.12329e+07	0.423903	2.04914e+07	0.12459	1.87224	2.34197e+07	7.07763e+06	6.83047e+06
mmu-miR-202-5p		26.7703	26.6407					25.8565	27.5444		27.8796	26.4339	267883	0.00197011	0.00189481	286011	286011	296093	274610	0.00398257	0.00134027	195926	0.00102532	0.00341321	89294.2	289372	91536.6	65308.6
hsa-miR-144		21.9013	19.6872	23.0442	22.7882	21.8466			22.6133		24.4003	23.9455	17443.7	0.00374884	0.015292	0.00215315	0.00257133	0.00511245	17881.8	15756	0.00266262	12758.1	0.000744609	0.00124724	5814.58	0.00327898	11212.6	4252.7
mmu-miR-345-3p		23.9422	23.7956	23.6157	24.801	25.5484		24.0617		22.8238		25.8779	72223.6	0.00377198	0.00367072	0.0059991	0.00263798	0.0016268	74037.3	0.00372568	70732.5	0.00711491	68262.4	0.00135295	24074.5	0.0034213	48256.6	22754.1
hsa-miR-24		10.0709		10.5306	10.4061	11.8794	10.7429				10.4082	10.3887	11.9964	0.00938911	8.87818	0.00865914	0.00943926	0.0035195	0.00717584	10.8358	11.7487	8.77402	0.0083438	0.0103366	6.96133	0.00720596	7.53056	2.9309
mmu-miR-1935		25.5862	22.1722	26.6124	25.8684				27.1057		23.6081	27.0961	72566.4	0.00121266	0.0113638	0.000755188	0.00126475	80208.4	74388.7	65545.6	0.000492088	53074.1	0.00536397	0.000584303	24188.8	26736.1	46644.8	17691.4
hsa-miR-23a		17.1487	16.5912		15.803	13.2649			13.1678		15.3334	17.0164	2845.02	0.0164824	0.0213253	3037.55	0.0531295	0.319485	2916.46	2569.76	0.302771	2080.81	0.0651311	0.0247893	948.353	1012.64	1828.84	693.633
mmu-miR-804		16.8236	13.5504		12.446	12.8265		13.8709		12.852	14.3166		1307.16	0.00948705	0.0806378	1395.62	0.250119	0.198913	1339.99	0.0788119	1280.18	0.129308	0.0605501	1509.94	435.751	465.358	873.415	503.377
mmu-miR-742*					27.6417	26.6689	26.8156			26.7875	27.742		1.17086	0.985636	0.866518	1.2501	5.96981e-09	1.21294e-08	1.0162e-08	1.05758	1.14669	7.39294e-09	4.92991e-09	1.3525	1.00767	0.416699	0.734756	0.450832
mmu-miR-669O	19.6878	24.7991	24.7353		26.0074				25.5629	25.1027		26.8129	12.2428	0.298144	0.273964	1.10389e+07	0.163654	1.14281e+07	1.05989e+07	9.33893e+06	0.204281	0.209874	9.77218e+06	0.101304	4.27163	7.489e+06	6.64594e+06	3.25739e+06
mmu-miR-1905		16.2312	15.5101		13.9622			18.2096		14.6215	17.6214		1792.81	0.0196179	0.0284324	1914.13	0.119935	1981.61	1837.83	0.00534216	1755.79	0.0520196	0.00840358	2070.92	597.619	1298.62	1197.88	690.328
mmu-miR-1961		17.9354			19.3948				23.5691	18.5718		25.8153	73.8243	0.00024793	54.635	78.8201	0.000114348	81.5987	75.6781	66.6817	5.80932e-06	0.000138573	69.7752	1.44429e-06	42.8198	53.473	47.4533	23.2585
mmu-miR-295						27.8769	21.0603				27.9684	27.2084	1.17086	0.985636	0.866518	1.2501	1.2501	5.25054e-09	5.48895e-07	1.05758	1.14669	0.856352	4.21388e-09	8.72171e-09	1.00767	0.833398	0.734756	0.285451
mmu-miR-217	26.1025	25.6337	19.5462	23.0296	25.5283					23.8718		25.9507	0.23098	0.269106	16.088	2.07517	0.367174	1.83951e+07	1.70604e+07	1.50323e+07	1.62989e+07	0.792961	1.57297e+07	0.296418	5.52936	6.13171e+06	1.61305e+07	5.24324e+06
hsa-miR-183	25.4741	17.9023	16.2545		14.39	25.2457					17.5991	18.4609	0.0241884	3.8739	10.672	1.20365e+06	56.062	0.0313202	1.15567e+06	1.01828e+06	1.10408e+06	824533	5.36673	3.60922	4.85669	401234	1.09268e+06	274847
mmu-miR-670	21.0479	19.7423	18.5733		19.1495					17.7691	18.5729		0.48888	1.01721	2.01089	1.13155e+06	1.94577	1.17144e+06	1.08644e+06	957291	1.03795e+06	3.47024	2.56889	1.22424e+06	1.17233	767664	1.02723e+06	408082
mmu-miR-290-3p					25.4797					23.3546	25.5744		1.17086	0.985636	0.866518	1.2501	2.67162e-08	1.29416	1.20026	1.05758	1.14669	7.98401e-08	2.21492e-08	1.3525	1.00767	0.848087	1.13484	0.450832
mmu-miR-673		19.7245	19.1339	16.8343	18.5745	19.3132	17.2685	17.162	15.506			20.5799	9282.93	0.00902039	0.0119423	0.0848191	0.0253891	0.0157517	0.0602733	0.0571749	0.195365	6789.41	8773.79	0.00684151	3094.32	0.0419866	0.104271	5187.74
mmu-miR-2183		19.5294	14.341	20.3719	21.0481		19.4927	17.884	19.8131	18.5901			2932.03	0.00326174	0.104564	0.002307	0.00144381	3240.8	0.00407434	0.0109486	0.00311727	0.00543404	2771.22	3386.87	977.378	1080.27	0.00604674	2052.7
hsa-miR-216a			27.9365		25.3978		22.4363	25.0558	27.9009			26.634	744.306	626.56	2.1443e-06	794.675	1.79761e-05	822.688	0.000134443	1.92754e-05	2.90869e-06	544.375	703.483	8.25577e-06	456.955	539.121	5.2209e-05	415.953
hsa-miR-367		27.0576			19.7105		26.5639	20.0883	27.9212		26.9359		607.511	3.66117e-06	449.6	648.623	0.000756016	671.488	6.27777e-06	0.000492228	2.34084e-06	444.325	4.47239e-06	701.753	352.37	440.037	0.000166949	382.026
hsa-miR-450a	21.7925	26.9405	25.0979	27.3386	27.4619	25.9184	26.5474		25.6992			27.1152	8.25551	0.196	0.618016	0.188642	0.173184	0.522657	0.313435	2.7086e+07	0.539076	2.19323e+07	2.83426e+07	0.23828	3.02317	0.294827	9.02868e+06	1.67583e+07
mmu-miR-1971	16.7519	17.0154	17.0968	18.2194	16.8558		14.8077	16.8366		17.9106			1.34756	0.945026	0.785252	0.520283	1.33882	164383	5.31592	1.14781	145651	0.441477	140565	171792	1.02595	54795.1	48552.5	104119
mmu-miR-879	25.6224	26.6401	26.4912	27.5325	27.4278			26.2014	27.4836		25.6837		1.81056	0.752734	0.733746	0.51432	0.553056	1.0337e+08	9.58696e+07	1.09477	0.48806	6.84001e+07	1.63998	1.08029e+08	1.09901	3.44566e+07	3.19565e+07	5.88097e+07
mmu-miR-346		17.8506	19.43	19.0214	19.0947		18.8873		19.105	19.8164			6447.14	0.0229624	0.00675484	0.0129362	0.0122954	7126.08	0.0136295	5823.38	0.0111976	0.00510713	6093.53	7447.27	2149.06	2375.37	1941.13	4513.6
mmu-miR-1901	23.0754		15.2728	15.2302	15.8121		18.0786	22.1137			15.2058		0.000933476	6945.57	0.154237	0.229188	0.15312	9119.7	0.0305546	0.00164222	8080.46	6034.53	0.20635	9530.75	2315.24	3040.03	2693.5	5188.5
mmu-miR-493	25.405	24.5591		25.3064		27.6709		27.3208	25.5598		26.4581		0.00271903	0.00411382	89400.7	0.00310827	128975	0.000624869	123834	0.000650855	0.00239183	88351.8	0.00123851	139540	29800.2	42991.8	41278	75964
mmu-miR-1906			19.508	23.2742	15.5584		22.6682	21.2995				21.9579	106.17	89.3742	0.000105387	1.11741e-05	0.00234904	117.35	1.63289e-05	3.7154e-05	103.978	77.6511	100.347	3.0106e-05	65.1813	39.1176	34.6592	59.3326
mmu-miR-488*	14.8176	23.8772	17.8125			26.7708		18.8399	26.3872	24.5236			18.9707	0.0299295	1.76124	584885	584885	0.00528806	561570	1.05452	0.00611258	0.0166122	517768	632795	6.92062	389924	187190	383521
mmu-miR-875-3p		20.7944				23.6428		20.7043	25.3503		18.2016		142.916	6.61555e-05	105.768	152.588	152.588	1.20603e-05	146.505	7.55551e-05	3.27202e-06	104.527	0.000448071	165.086	82.8946	101.725	48.835	89.8712
mmu-miR-217	24.3792	19.4801	17.5149					15.8232	24.2304		15.7226		0.0772896	1.94142	6.66436	1.80067e+06	1.80067e+06	1.86414e+06	1.72889e+06	26.2744	0.0839181	1.23351e+06	29.4794	1.94816e+06	2.89436	1.82183e+06	576304	1.06057e+06
hsa-let-7f-1*	20.2649	19.2847	24.6082	21.4313	18.0609		22.2231			19.1283			2.54661	4.22921	0.0928494	1.21139	12.5281	3.54643e+06	0.671833	2.89811e+06	3.14229e+06	4.09514	3.03256e+06	3.70628e+06	2.28955	1.18215e+06	2.01347e+06	2.24628e+06
rno-miR-673			24.7608	26.7979		26.8174		26.5467		27.1268			357.346	300.816	9.30272e-06	3.27012e-06	381.529	3.3399e-06	366.32	3.29275e-06	349.968	1.78347e-06	337.747	412.781	219.387	127.176	238.763	250.176
hsa-miR-9				10.4458		12.2653	10.0635					10.4742	1.17086	0.985636	0.866518	0.0008963	1.2501	0.000262891	0.00112166	1.05758	1.14669	0.856352	1.10664	0.000950781	1.00767	0.417085	0.73513	0.654649
hsa-miR-708*	10.8063		23.9342	27.3424					24.4512			24.8214	2.002	3017.81	0.000165517	2.24928e-05	3827.53	3962.46	3674.95	3238.09	0.000153066	2621.97	3388.31	0.000139674	1006.6	2596.66	2304.35	2003.43
hsa-miR-377			27.9414		26.3019		24.4754			25.9793			745.141	627.263	2.1395e-06	795.567	9.61616e-06	823.612	3.27481e-05	673.049	729.757	8.23836e-06	704.273	860.734	457.468	539.726	467.602	521.669
mmu-miR-293					27.197			24.4092			21.8242		1.17086	0.985636	0.866518	1.2501	8.1254e-09	1.29416	1.20026	4.74682e-08	1.14669	0.856352	2.9804e-07	1.3525	1.00767	0.848087	0.782317	0.736283
hsa-miR-196A			21.4782				22.5574					21.4093	167.377	140.899	4.24029e-05	178.704	178.704	185.004	2.77983e-05	151.184	163.922	122.418	158.197	6.94213e-05	102.759	180.804	105.035	93.5383
mmu-miR-1937B								10.1264			10.5017		1.17086	0.985636	0.866518	1.2501	1.2501	1.29416	1.20026	0.00094619	1.14669	0.856352	0.000763258	1.3525	1.00767	1.26479	0.782632	0.736537
mmu-miR-292-5p								19.2417			22.6622		1.17086	0.985636	0.866518	1.2501	1.2501	1.29416	1.20026	1.70597e-06	1.14669	0.856352	1.66723e-07	1.3525	1.00767	1.26479	0.782318	0.736283
mmu-miR-470*								27.7587		25.8042			1.17086	0.985636	0.866518	1.2501	1.2501	1.29416	1.20026	4.65699e-09	1.14669	1.46159e-08	1.10664	1.3525	1.00767	1.26479	0.782317	0.819713
hsa-miR-10b	25.7998	24.6815		17.3254	24.3929	25.4447				10.4243			0.00233054	0.00425897	100749	0.884971	0.00659816	0.00329494	139553	122963	133324	72.4605	128668	157253	33582.9	0.298288	131947	95330.9
mmu-miR-327	15.1105	25.1071		24.7607	22.9539	24.6438					18.7784		0.359225	0.000295998	9404.69	0.000477311	0.00166989	0.000535838	13027	11478.4	12445.5	9294.35	0.0267124	14679.2	3135.02	0.000894347	12316.9	7991.19
mmu-miR-1947		24.6005	24.3086	10.5599		27.7087					21.8369		94668.2	0.00313283	0.00337178	66.9551	101075	0.000477021	97045.5	85509.1	92713.7	69239.1	0.0238862	109354	31556.1	33713.9	91756.1	59531
mmu-miR-376c*	23.544			26.006	26.866							25.6765	2.20563e-05	227.093	199.647	4.27406e-06	2.35476e-06	298.178	276.543	243.669	264.199	197.305	254.973	5.81065e-06	142.247	99.3927	261.47	150.759
rno-miR-196c	21.6043				26.3822	27.9282					27.7098		5.40523e-05	145.065	127.533	183.988	2.10361e-06	7.45775e-07	176.654	155.654	168.768	126.037	7.41921e-07	199.059	90.8661	61.3293	167.025	108.365
mmu-miR-695				16.5396	16.5625					14.2551			1.17086	0.985636	0.866518	1.31231e-05	1.2916e-05	1.29416	1.20026	1.05758	1.14669	4.37965e-05	1.10664	1.3525	1.00767	0.431397	1.13484	0.819728
mmu-miR-878-3p		14.2397	15.6097		15.0127					13.3777			1157.98	0.0503878	0.0171385	1236.35	0.0373988	1279.93	1187.06	1045.95	1134.07	0.0795744	1094.47	1337.62	386.017	838.771	1122.36	810.723
hsa-miR-29a	17.0781			10.7171							10.0979		0.000437689	50.9785	44.8175	0.0384102	64.6567	66.936	62.0793	54.6995	59.3082	44.2917	0.0522274	69.9529	31.9321	43.877	58.6957	38.099
mmu-miR-1927		25.8178			26.9844					27.2417			456.19	6.49285e-06	337.612	487.062	3.66823e-06	504.232	467.646	412.054	446.772	2.10251e-06	431.17	526.959	264.601	330.431	442.157	319.376
rno-miR-505	13.7339				27.0981						24.8168		0.00205255	23.5409	20.6958	29.8572	2.07831e-07	30.9097	28.667	25.2592	27.3874	20.453	8.94356e-07	32.3029	14.7463	20.2556	27.1045	17.5853
rno-miR-20b-3p				20.2995						10.5111			1.17086	0.985636	0.866518	9.68691e-07	1.2501	1.29416	1.20026	1.05758	1.14669	0.000586814	1.10664	1.3525	1.00767	0.848087	1.13484	0.819909
mmu-miR-19a*					21.6305							21.2604	1.17086	0.985636	0.866518	1.2501	3.85037e-07	1.29416	1.20026	1.05758	1.14669	0.856352	1.10664	5.38414e-07	1.00767	0.848087	1.13484	0.654332
mmu-miR-483*					14.5637						17.8575		1.17086	0.985636	0.866518	1.2501	5.16205e-05	1.29416	1.20026	1.05758	1.14669	0.856352	4.6598e-06	1.3525	1.00767	0.848104	1.13484	0.736284
rno-miR-135a*		24.6149	25.1551								25.3699		115503	0.00378428	0.00228784	123319	123319	127666	118403	104328	113118	84477.1	0.00251768	133420	38500.9	124768	111950	72632.5
mmu-miR-1939			24.821									27.9817	362.352	305.03	9.04748e-06	386.873	386.873	400.511	371.451	327.294	354.871	265.019	342.478	1.57913e-06	222.461	391.419	351.205	202.499
mmu-miR-291a-3p			11.8384							10.5086			18.047	15.1921	0.00364734	19.2683	19.2683	19.9476	18.5002	16.301	17.6744	0.00906022	17.0572	20.8467	11.0809	19.4947	17.4919	12.6376
hsa-miR-875-5p		17.9119								13.9272			73.4259	0.000250627	54.3403	78.3949	78.3949	81.1584	75.2698	66.322	71.9099	0.00344732	69.3988	84.8164	42.5888	79.3161	71.1672	51.4062
hsa-miR-222	26.4933									10.2042			5.64486e-06	448.893	394.643	569.337	569.337	589.407	546.642	481.659	522.241	0.330607	504.004	615.973	281.179	576.027	516.847	373.436
ath-miR159a										13.4739			1.17086	0.985636	0.866518	1.2501	1.2501	1.29416	1.20026	1.05758	1.14669	7.52657e-05	1.10664	1.3525	1.00767	1.26479	1.13484	0.819738
hsa-miR-208b												27.8739	1.17086	0.985636	0.866518	1.2501	1.2501	1.29416	1.20026	1.05758	1.14669	0.856352	1.10664	5.49876e-09	1.00767	1.26479	1.13484	0.654332
hsa-miR-30c-2*											17.5332		1.17086	0.985636	0.866518	1.2501	1.2501	1.29416	1.20026	1.05758	1.14669	0.856352	5.83434e-06	1.3525	1.00767	1.26479	1.13484	0.736284
hsa-miR-590-3P											17.518		1.17086	0.985636	0.866518	1.2501	1.2501	1.29416	1.20026	1.05758	1.14669	0.856352	5.89629e-06	1.3525	1.00767	1.26479	1.13484	0.736284
mmu-miR-10b*										26.7558			1.17086	0.985636	0.866518	1.2501	1.2501	1.29416	1.20026	1.05758	1.14669	7.55728e-09	1.10664	1.3525	1.00767	1.26479	1.13484	0.819713
mmu-miR-145*										26.8355			1.17086	0.985636	0.866518	1.2501	1.2501	1.29416	1.20026	1.05758	1.14669	7.15099e-09	1.10664	1.3525	1.00767	1.26479	1.13484	0.819713
mmu-miR-1959											17.0788		1.17086	0.985636	0.866518	1.2501	1.2501	1.29416	1.20026	1.05758	1.14669	0.856352	7.99404e-06	1.3525	1.00767	1.26479	1.13484	0.736285
mmu-miR-718											22.0326		1.17086	0.985636	0.866518	1.2501	1.2501	1.29416	1.20026	1.05758	1.14669	0.856352	2.57942e-07	1.3525	1.00767	1.26479	1.13484	0.736283
mmu-miR-741										10.5575			1.17086	0.985636	0.866518	1.2501	1.2501	1.29416	1.20026	1.05758	1.14669	0.000568252	1.10664	1.3525	1.00767	1.26479	1.13484	0.819902
rno-miR-653											18.0169		1.17086	0.985636	0.866518	1.2501	1.2501	1.29416	1.20026	1.05758	1.14669	0.856352	4.17243e-06	1.3525	1.00767	1.26479	1.13484	0.736284
rno-miR-760-5p												24.0962	1.17086	0.985636	0.866518	1.2501	1.2501	1.29416	1.20026	1.05758	1.14669	0.856352	1.10664	7.54163e-08	1.00767	1.26479	1.13484	0.654332
hsa-miR-141		21.3096		21.1949	20.4121		26.3006	18.3052					160.985	5.21383e-05	119.14	7.15991e-05	0.000123186	177.938	1.99662e-06	0.000448926	157.661	117.742	152.155	185.958	93.375	59.3128	52.5539	151.952
rno-miR-743a		23.3557		25.9773	22.9119		25.1403	22.801					258.284	2.0255e-05	191.148	4.17434e-06	3.4943e-05	285.484	7.1595e-06	3.19234e-05	252.951	188.906	244.118	298.351	149.811	95.1613	84.3171	243.792
mmu-miR-10b					27.6395			27.7764	27.7531				1.17086	0.985636	0.866518	1.2501	5.97891e-09	1.29416	1.20026	4.60034e-09	5.06902e-09	0.856352	1.10664	1.3525	1.00767	0.848087	0.400088	1.10516
mmu-miR-201	14.2465						27.7625		27.7729				0.00161966	26.5007	23.298	33.6112	33.6112	34.7961	1.41736e-07	28.4351	1.34434e-07	23.0247	29.7542	36.3644	16.6001	34.0062	9.47835	29.7144
mmu-miR-1968	18.6558	25.0611	21.2357		23.2511	27.7978			26.4992				9.33494	0.0927137	1.15543	4.11626e+06	0.412319	0.0182628	3.95217e+06	3.48235e+06	0.0398058	2.81976e+06	3.6439e+06	4.45343e+06	3.5277	1.37209e+06	2.47817e+06	3.63903e+06
rno-miR-871				22.86	24.024			17.4689					1.17086	0.985636	0.866518	1.64205e-07	7.32847e-08	1.29416	1.20026	5.82966e-06	1.14669	0.856352	1.10664	1.3525	1.00767	0.431388	0.782319	1.10516
mmu-miR-494			21.2551		25.6612			25.5422					158.969	133.821	4.7007e-05	169.727	3.19863e-06	175.71	162.961	2.93875e-06	155.687	116.268	150.25	183.63	97.5968	115.146	106.216	150.049
mmu-miR-453	21.4969			26.6876					26.8039				5.68025e-05	141.51	124.408	1.66047e-06	179.479	185.805	172.324	151.839	1.4052e-06	122.948	158.883	194.18	88.639	121.761	108.054	158.67
mmu-miR-1894-3P	21.6307				10.7621			11.34					5.33961e-05	145.954	128.314	185.115	0.10659	191.64	177.736	0.0604138	169.802	126.809	163.872	200.278	91.4227	125.621	115.866	163.653
mmu-miR-105					23.5088		20.3401						1.17086	0.985636	0.866518	1.2501	1.04737e-07	1.29416	9.04273e-07	1.05758	1.14669	0.856352	1.10664	1.3525	1.00767	0.848087	0.734756	1.10516
mmu-miR-691	21.6328						27.4924						5.3345e-05	146.024	128.376	185.204	185.204	191.732	9.418e-07	156.682	169.883	126.87	163.951	200.374	91.4665	187.38	108.855	163.732
rno-miR-344	19.4151							19.3038					0.000148646	87.4767	76.9048	110.948	110.948	114.859	106.525	0.000145037	101.77	76.0025	98.2162	120.036	54.7939	112.252	69.4318	98.0849
mmu-miR-1970								27.9986					1.17086	0.985636	0.866518	1.2501	1.2501	1.29416	1.20026	3.94367e-09	1.14669	0.856352	1.10664	1.3525	1.00767	1.26479	0.782317	1.10516
mmu-miR-883b-3p									26.0887				1.17086	0.985636	0.866518	1.2501	1.2501	1.29416	1.20026	1.05758	1.60682e-08	0.856352	1.10664	1.3525	1.00767	1.26479	0.752615	1.10516
mmu-miR-96								27.2242					1.17086	0.985636	0.866518	1.2501	1.2501	1.29416	1.20026	6.74569e-09	1.14669	0.856352	1.10664	1.3525	1.00767	1.26479	0.782317	1.10516
rno-miR-377									26.7931				1.17086	0.985636	0.866518	1.2501	1.2501	1.29416	1.20026	1.05758	9.86068e-09	0.856352	1.10664	1.3525	1.00767	1.26479	0.752615	1.10516
mmu-miR-465a-3p		26.1281	26.5932	26.3982	26.999								228422	0.00262187	0.00166975	0.00275762	0.00181836	252477	234158	206322	223706	167065	215894	263856	76140.6	84158.9	221395	215605
mmu-miR-1942				27.662	11.5967								1.17086	0.985636	0.866518	5.88655e-09	0.000403632	1.29416	1.20026	1.05758	1.14669	0.856352	1.10664	1.3525	1.00767	0.431523	1.13484	1.10516
mmu-miR-694		13.634	23.3896			14.3014							6075.46	0.402306	0.000409133	6486.6	6486.6	0.332604	6228.02	5487.65	5950.02	4443.51	5742.24	7017.93	2025.29	4324.51	5888.56	5734.56
mmu-miR-1192		15.5939			14.5677								42.9788	0.000731508	31.8073	45.8873	0.00188957	47.5049	44.0581	38.8206	42.0914	31.4341	40.6216	49.646	24.9289	31.1314	41.6567	40.5672
mmu-miR-463		25.4119			24.0826								415.353	7.83235e-06	307.39	443.461	2.49623e-05	459.094	425.784	375.168	406.778	303.784	392.573	479.786	240.914	300.852	402.576	392.048
mmu-miR-546				10.5243									1.17086	0.985636	0.866518	0.000848835	1.2501	1.29416	1.20026	1.05758	1.14669	0.856352	1.10664	1.3525	1.00767	0.84837	1.13484	1.10516
rno-miR-881				10.7322									1.17086	0.985636	0.866518	0.000734903	1.2501	1.29416	1.20026	1.05758	1.14669	0.856352	1.10664	1.3525	1.00767	0.848332	1.13484	1.10516
hsa-miR-196b						27.5529							1.17086	0.985636	0.866518	1.2501	1.2501	6.57265e-09	1.20026	1.05758	1.14669	0.856352	1.10664	1.3525	1.00767	0.833398	1.13484	1.10516
mmu-miR-466d-5p	12.4369		24.5095										1.07633	5023.87	0.000184934	6371.84	6371.84	6596.46	6117.84	5390.57	5844.75	4364.9	5640.65	6893.78	1674.98	6446.71	5784.39	5633.11
rno-miR-220	22.6158	22.1532											0.00565894	0.00656475	26918.3	38834.1	38834.1	40203	37286	32853.6	35621.7	26602.5	34377.7	42015.1	8972.76	39290.4	35253.7	34331.7
mmu-miR-1902			26.7698										568.434	478.511	3.67645e-06	606.902	606.902	628.296	582.709	513.438	556.698	415.745	537.258	656.615	348.982	614.033	550.948	536.539
mmu-miR-450B-3P			24.7895										359.721	302.815	9.18032e-06	384.064	384.064	397.603	368.754	324.918	352.294	263.095	339.991	415.524	220.845	388.577	348.655	339.537
rno-miR-711			16.6087										54.3351	45.7395	0.000402372	58.0121	58.0121	60.0571	55.6996	49.0782	53.2133	39.74	51.355	62.764	33.3584	58.6938	52.6637	51.2863
hsa-miR-653		26.4903											532.875	4.75857e-06	394.365	568.936	568.936	588.992	546.257	481.32	521.873	389.738	503.649	615.539	309.08	575.622	516.483	502.975
mmu-miR-294		26.8379											577.448	4.0523e-06	427.352	616.526	616.526	638.259	591.949	521.58	565.526	422.338	545.777	667.027	334.933	623.77	559.685	545.047
mmu-miR-467H		22.4999											211.944	3.00806e-05	156.853	226.286	226.286	234.263	217.266	191.438	207.568	155.013	200.319	244.822	122.932	228.945	205.424	200.051
mmu-miR-669E		24.92											370.73	9.83135e-06	274.366	395.818	395.818	409.771	380.039	334.861	363.075	271.147	350.396	428.24	215.032	400.469	359.325	349.928
ath-miR159a	23.9492												1.829e-05	249.38	219.242	316.293	316.293	327.442	303.684	267.583	290.128	216.67	279.997	342.201	156.207	320.009	287.132	279.622
mmu-miR-1945	18.7109												0.000205817	74.341	65.3566	94.2877	94.2877	97.6115	90.5291	79.7673	86.4881	64.5898	83.4679	102.011	46.5659	95.3957	85.5949	83.3563
mmu-miR-2134	10.3351												0.00987154	10.7344	9.43709	13.6146	13.6146	14.0945	13.0718	11.5179	12.4884	9.32637	12.0522	14.7298	6.72711	13.7745	12.3594	12.0361
mmu-miR-302c*	10.7703												0.00807323	11.8699	10.4353	15.0547	15.0547	15.5854	14.4546	12.7363	13.8094	10.3129	13.3271	16.2879	7.43776	15.2316	13.6667	13.3093
mmu-miR-505	10.8309												0.0078502	12.0373	10.5825	15.2671	15.2671	15.8053	14.6585	12.9159	14.0042	10.4584	13.5151	16.5176	7.54257	15.4465	13.8595	13.4971
mmu-miR-509-3p	10.1379												0.0108132	10.2563	9.0168	13.0082	13.0082	13.4668	12.4897	11.005	11.9322	8.91102	11.5155	14.0738	6.42798	13.1611	11.8089	11.5001
mmu-miR-675-3p	22.7576												3.17218e-05	189.361	166.476	240.169	240.169	248.636	230.595	203.183	220.302	164.523	212.609	259.842	118.612	242.991	218.027	212.325
mmu-miR-677	21.0896												6.85657e-05	128.8	113.234	163.359	163.359	169.118	156.847	138.201	149.846	111.906	144.613	176.74	80.678	165.278	148.298	144.419
mmu-miR-686	23.2863												2.4846e-05	213.964	188.106	271.374	271.374	280.94	260.556	229.582	248.925	185.899	240.233	293.603	134.023	274.563	246.354	239.911
mmu-miR-687	14.1035												0.0017303	25.6394	22.5408	32.5189	32.5189	33.6652	31.2226	27.5109	29.8289	22.2764	28.7872	35.1826	16.0607	32.901	29.5208	28.7487
mmu-miR-692	21.7787												4.9867e-05	151.03	132.777	191.553	191.553	198.306	183.917	162.054	175.708	131.22	169.572	207.244	94.6024	193.804	173.893	169.345
mmu-miR-712*	14.8951												0.00120021	30.7852	27.0647	39.0453	39.0453	40.4217	37.4888	33.0323	35.8154	26.7471	34.5647	42.2436	19.2837	39.5041	35.4455	34.5185
mmu-miR-759	20.4255												9.31942e-05	110.478	97.1261	140.121	140.121	145.06	134.535	118.542	128.53	95.9866	124.041	151.598	69.2013	141.767	127.202	123.875
mmu-miR-881	21.6234												5.35776e-05	145.706	128.097	184.801	184.801	191.316	177.434	156.342	169.514	126.594	163.595	199.939	91.2677	186.973	167.763	163.376
mmu-miR-882	17.3433												0.000387209	54.1997	47.6494	68.7422	68.7422	71.1655	66.0019	58.1558	63.0558	47.0904	60.8538	74.3731	33.9498	69.55	62.4045	60.7724
mmu-miR-883B-5P	12.329												0.00392859	17.0158	14.9593	21.5813	21.5813	22.3421	20.721	18.2578	19.7961	14.7838	19.1048	23.3491	10.6597	21.8349	19.5916	19.0792
rno-miR-293	19.9733												0.000114849	99.519	87.4917	126.221	126.221	130.671	121.19	106.783	115.78	86.4653	111.737	136.56	62.337	127.705	114.584	111.588
rno-miR-294	20.3173												9.79704e-05	107.751	94.729	136.662	136.662	141.48	131.215	115.616	125.357	93.6176	120.98	147.857	67.4934	138.268	124.063	120.818
rno-miR-333	18.0932												0.000273804	64.454	56.6644	81.7479	81.7479	84.6296	78.4891	69.1586	74.9856	55.9996	72.367	88.444	40.3729	82.7084	74.2111	72.2702
rno-miR-465	20.243												0.000101393	105.917	93.1163	134.336	134.336	139.071	128.981	113.648	123.223	92.0238	118.92	145.339	66.3444	135.914	121.951	118.761
