# Supplementary material for: P2X7 Receptor-Dependent microRNA Expression Profile in the Brain Following Status Epilepticus in Mice
Source: Front Mol Neurosci. 2020 Aug 12;13:127. doi: 10.3389/fnmol.2020.00127 (PMC7485385; doi:10.3389/fnmol.2020.00127)
Supplement: Supplementary file 3 [file Table_2.XLSX]

## Sheet: Control
Control
Dysregulated miRNAs
microRNAs	Average Fold change
Target Name	WT control	KO control
mmu-miR-155	1.02718	13.4569
hsa-miR-671-3p	1.08768	6.65891
mmu-miR-1932	1.04345	5.70767
hsa-miR-129	1.45206	4.68808
hsa-let-7a	1.01276	3.85956
hsa-miR-32	1.45123	3.81549
mmu-miR-467b	1.35747	3.33643
hsa-miR-10a	1.15653	3.26308
hsa-miR-485-5p	1.28043	2.99988
mmu-miR-500	1.40974	2.91127
hsa-miR-490	1.09505	2.78453
hsa-miR-145	1.43075	2.6786
mmu-miR-129-3p	1.24394	2.63565
mmu-miR-685	1.20573	2.36897
hsa-miR-328	1.02819	2.35589
mmu-miR-721	1.09011	2.25115
hsa-miR-34a	1.00127	2.20204
mmu-miR-485-3p	1.05503	2.14838
mmu-miR-376a	1.00348	2.05668
hsa-miR-532-3p	1.34992	2.05518
mmu-miR-491	1.25088	2.04428
hsa-miR-543	1.08431	2.03957
hsa-miR-30c-1*	1.20143	2.02753
hsa-miR-197	1.08498	1.98136
rno-miR-190b	1.07005	1.9017
hsa-miR-324-3p	1.07175	1.89118
hsa-miR-221	1.05603	1.89049
hsa-miR-15b	1.37425	1.87854
mmu-miR-21*	1.04439	1.87583
mmu-miR-467F	1.12088	1.86549
mmu-miR-344	1.00183	1.86029
hsa-miR-302b	1.06867	1.79441
mmu-let-7d*	1.1083	1.74574
hsa-miR-296	1.0206	1.73783
mmu-miR-29b*	1.02294	1.71823
hsa-miR-200b*	1.42567	1.70636
mmu-miR-2135	1.02597	1.69734
mmu-miR-540	1.03016	1.6534
hsa-miR-378	1.00576	1.6515
mmu-miR-31*	1.08464	1.63577
hsa-let-7f	1.02291	1.61402
hsa-miR-185	1.00001	1.60955
mmu-miR-702	1.07574	1.59785
hsa-miR-200c	1.31966	1.57556
hsa-miR-195	1.45705	1.56446
mmu-miR-434-5p	1.05821	1.54887
mmu-miR-330	1.00504	1.54381
mmu-miR-700	1.07674	1.52929
hsa-miR-219	1.39993	1.51985
mmu-miR-1954	1.08356	1.51195
hsa-miR-323-3p	1.10223	0.598785
hsa-miR-23b	1.01273	0.597439
rno-miR-339-3p	1.04087	0.597176
mmu-miR-429	1.07667	0.591164
mmu-miR-15a*	1.23706	0.589871
mmu-miR-542-5p	1.1554	0.5883
mmu-miR-1839-3P	1.07032	0.587571
mmu-miR-370	1.26604	0.583524
hsa-miR-29b	1.0185	0.572898
hsa-miR-148b	1.02074	0.569369
hsa-miR-30b	1.1005	0.54708
hsa-miR-369-3p	1.02046	0.544182
hsa-miR-133a	1.09748	0.540738
hsa-let-7e	1.01659	0.535711
mmu-miR-379	1.16589	0.524255
hsa-miR-21	1.26254	0.518992
mmu-miR-20a*	1.21313	0.516174
mmu-miR-467c	1.38225	0.504085
hsa-miR-181c	1.06041	0.502086
mmu-miR-547	1.14956	0.501883
hsa-miR-29c	1.04431	0.486177
hsa-miR-19a	1.0113	0.471588
hsa-miR-338-5P	1.12831	0.466341
mmu-miR-182	1.02038	0.466215
mmu-miR-467a	1.00155	0.460937
mmu-miR-384-3p	1.28502	0.435493
hsa-miR-136	1.02024	0.43513
hsa-miR-34c	1.00194	0.405273
hsa-miR-493-3p	1.01384	0.400522
hsa-miR-338-3p	1.10982	0.397237
hsa-miR-98	1.12947	0.390479
mmu-miR-449b	1.08143	0.354958
rno-miR-382*	1.12164	0.300515
rno-miR-20b	1.00258	0.281655
hsa-miR-431*	1.74185	0.267805

## Sheet: post SE
Post SE
Dysregulated miRNAs
microRNAs	Average Fold change
Target Name	WT post SE	KO post SE
mmu-miR-770-3p	1.3152	34.0991
mmu-miR-1188	1.26639	8.71532
hsa-miR-431*	1.37623	5.10766
mmu-miR-191*	1.22478	4.72566
hsa-miR-136	1.37001	3.49256
mmu-miR-491	1.00205	2.95057
hsa-miR-219	1.04202	2.9424
mmu-miR-155	1.21751	2.90518
mmu-miR-324-3p	1.00232	2.74367
mmu-miR-489	1.36025	2.72887
hsa-miR-375	1.00885	2.56117
mmu-miR-1949	1.2352	2.51299
hsa-miR-20b	1.33198	2.50115
mmu-miR-34c*	1.40034	2.39805
mmu-miR-701	1.02605	2.26368
rno-miR-204*	1.31438	2.2619
hsa-miR-223	1.08349	2.02974
mmu-miR-467e	1.11245	2.02189
mmu-miR-451	1.0002	2.01415
mmu-miR-34b-5p	1.17332	2.00008
hsa-miR-493-3p	1.15705	1.83692
mmu-miR-339-3p	1.08034	1.81392
hsa-miR-27a	1.00824	1.8026
rno-miR-382*	1.1263	1.79378
mmu-miR-330	1.06557	1.79256
hsa-miR-382	1.00706	1.78722
mmu-miR-34b-3p	1.15746	1.78411
mmu-miR-467F	1.26157	1.77576
hsa-miR-27b*	1.03112	1.74535
mmu-miR-1954	1.15518	1.69876
mmu-miR-449b	1.10622	1.67811
hsa-miR-32	1.0357	1.66786
hsa-miR-331-5p	1.10317	1.65795
mmu-miR-376b	1.0298	1.6422
hsa-miR-34a	1.03169	1.59924
hsa-miR-216b	1.09808	1.59664
mmu-miR-496	1.11089	1.59257
rno-miR-125b*	1.01676	1.58301
mmu-miR-466b-3-3p	1.10088	1.55907
rno-miR-190b	1.38522	1.54703
hsa-miR-15b	1.01026	1.52717
rno-miR-345-3p	1.0455	1.52557
mmu-miR-218-1*	1.04868	1.52384
hsa-miR-107	1.01294	1.518
hsa-miR-30d*	1.01899	1.5063
mmu-miR-139-3p	1.00933	0.596665
hsa-miR-30c	1.00181	0.568068
hsa-miR-98	1.0214	0.565948
hsa-miR-181c	1.01507	0.555354
mmu-miR-362-5p	1.07154	0.536595
mmu-miR-542-5p	1.12534	0.514098
hsa-miR-324-3p	2.07226	0.467615
hsa-miR-490	1.09183	0.45929
mmu-miR-721	1.29797	0.413927
mmu-miR-300	1.09082	0.381447
hsa-miR-10a	1.52075	0.350144
rno-miR-207	1.7098	0.286745
mmu-miR-151	1.0816	0.237752
