# Supplementary material for: P2X7 Receptor-Dependent microRNA Expression Profile in the Brain Following Status Epilepticus in Mice
Source: Front Mol Neurosci. 2020 Aug 12;13:127. doi: 10.3389/fnmol.2020.00127 (PMC7485385; doi:10.3389/fnmol.2020.00127)
Supplement: Supplementary file 4 [file Table_3.XLSX]

## Sheet: Control
Upregulated microRNAs
Pathways	p.adjust	Target Genes	no of target genes
Signaling by Receptor Tyrosine Kinases	6.59472e-09	Actb, Atp6v0d1, Crk, Fgf10, Ins1, Lamb3, Nckap1l, Nrp1, Pdgfc, Pdgfd, Pdgfra, Pik3r1, Plat, Ppp2cb, Rac1, Rap1b, Spred1, Creb1, Dusp4, Flt3, Atp6v1g1, Col9a1, Fgf5, Flrt3, Flt1, Grap2, Hnrnpf, Igf2, Itga3, Kras, Mapkapk3, Ntrk3, Rbfox2, Stat5b, Tia1, Wasf2, Arhgef7, Atp6v1h, Bdnf, Col1a1, Col23a1, Col4a1, Col5a1, Dock1, Egfr, Elmo1, Esr1, Fgf4, Fgfr1, Fgfr2, Frs2, Hnrnpa1, Insr, Irs1, Itch, Itga2…	266
Intracellular signaling by second messengers	3.75795e-06	Bmi1, Fgf10, Il1rl1, Il33, Ins1, Lamtor5, Pdgfra, Pik3r1, Ppp2cb, Rac1, Creb1, Slc38a9, Adcy1, Fgf5, Frk, Mbd3, Pde1c, Pip4k2a, Rragd, Sall4, Adcy6, Egfr, Esr1, Fgf4, Fgfr1, Fgfr2, Frs2, Il1rap, Insr, Irs1, Lamtor3, Mapk1, Mtor, Pik3cb, Prkca, Prkcd, Rheb, Rictor, Xiap, Cdkn1b, Ereg, Fgf8, Foxo1, Foxo3, Foxo6, Gab1, Pdgfa, Pdpk1, Ppp2r1a, Ppp2r5e, Prex2, Rragc, Strn, Them4, Tnks, Ubc, Erbb3, Fyn,…	148
PIP3 activates AKT signaling	1.08471e-05	Bmi1, Fgf10, Il1rl1, Il33, Ins1, Lamtor5, Pdgfra, Pik3r1, Ppp2cb, Rac1, Creb1, Slc38a9, Fgf5, Frk, Mbd3, Pip4k2a, Rragd, Sall4, Egfr, Esr1, Fgf4, Fgfr1, Fgfr2, Frs2, Il1rap, Insr, Irs1, Lamtor3, Mapk1, Mtor, Pik3cb, Rheb, Rictor, Xiap, Cdkn1b, Ereg, Fgf8, Foxo1, Foxo3, Foxo6, Gab1, Pdgfa, Pdpk1, Ppp2r1a, Ppp2r5e, Prex2, Rragc, Strn, Them4, Tnks, Ubc, Erbb3, Fyn, Erbb4, Nedd4, Phc3, Cbx4, Cd28, Fg…	131
Death Receptor Signalling	3.24505e-05	Adam17, Akap13, Arhgef15, Cflar, Fasl, Fgd4, Gna13, Kalrn, Rac1, Psen1, Abr, Arhgef6, Tab3, Arhgef10l, Arhgef11, Arhgef18, Arhgef33, Arhgef7, Bcl2l11, Fas, Ikbkg, Itsn1, Mapk8, Nfkbia, Prkci, Tab2, Trio, Xiap, Ikbkb, Map3k7, Otud7b, Psen2, Sqstm1, Arhgef12, Bag4, Casp2, Nfkb1, Sppl2a, Ubc, Arhgef2, Arhgef26, Arhgef37, Ripk1, Net1, Tab1, Traf1, Aph1a, Arhgef10, Birc2, Casp3, Smpd3, Sppl2b, Tnfrsf1…	91
Negative regulation of the PI3K/AKT network	5.80363e-05	Fgf10, Il1rl1, Il33, Ins1, Pdgfra, Pik3r1, Ppp2cb, Rac1, Fgf5, Pip4k2a, Egfr, Esr1, Fgf4, Fgfr1, Fgfr2, Frs2, Il1rap, Insr, Irs1, Mapk1, Pik3cb, Ereg, Fgf8, Gab1, Pdgfa, Ppp2r1a, Ppp2r5e, Strn, Them4, Erbb3, Fyn, Erbb4, Cd28, Fgf2, Fgf6, Klb, Akt3, Cd80, Hbegf, Icos, Pdgfb, Pdgfrb, Phlpp2, Pik3r3, Ppp2ca, Pten, Trib3, Pik3ca, Ptpn11, Cd19, Fgf15, Rhog, Traf6, Kitl, Fgf17, Mapk3, Pip4k2b, Pip4k2c,…	80
MAPK family signaling cascades	5.80363e-05	Actb, Cul3, Fgf10, Kalrn, Map2k1, Pdgfra, Ppp2cb, Rac1, Rap1b, Spred1, Dab2ip, Dusp4, Flt3, Ywhab, Camk2d, Fgf5, Kras, Sept7, Syngap1, Dnajb1, Araf, Dlg2, Dusp10, Dusp16, Egfr, Fgf4, Fgfr1, Fgfr2, Frs2, Il6, Il6st, Irs1, Kbtbd7, Lamtor3, Mapk1, Rasa2, Sptbn1, Ereg, Fgf8, Il17rd, Itga2b, Rap1a, Rapgef2, Spred2, Xpo1, Dusp6, Foxo1, Foxo3, Pdgfa, Ppp2r1a, Ppp2r5e, Ranbp9, Rasal2, Ubc, Vcl, Erbb3, Fy…	148
Axon guidance	9.50289e-05	Actb, Arhgap35, Gpc1, Kalrn, Map2k1, Nrp1, Pik3r1, Ptprc, Rac1, Creb1, Rhob, Cdk5, Cntn2, Col9a1, Kras, Msn, Rap1gap, Vldlr, Ank1, Arhgef11, Arhgef7, Col23a1, Col4a1, Col5a1, Dock1, Efnb2, Egfr, Epha4, Epha7, Fgfr1, Frs2, Itgb1, Itsn1, Mapk1, Mapk8, Pik3cb, Plxna2, Prkca, Rock2, Sdcbp, Sema3a, Sh3gl2, Sptbn1, St8sia4, Trio, Usp33, Yes1, Cdk5r1, Itga2b, Mapk14, St8sia2, Arhgef12, Cltc, Dag1, Gab1,…	169
Apoptosis	0.000129456	Aven, Cflar, Dnm1l, Fasl, Hist1h1c, Satb1, Bcl2, Ywhab, Bmx, Pkp1, Appl1, Bcl2l11, Fas, Hmgb2, Ly96, Mapk8, Prkcd, Stk24, Tjp2, Xiap, Bid, Fnta, Gzmd, Ppp3cc, Ppp3r1, Tjp1, Add1, Kpna1, Ywhag, Ptk2, Ripk1, Gzmc, Prkcq, Bak1, Kpnb1, Rock1, Birc2, Bmf, Casp3, Ctnnb1, Dsp, Lmnb1, Tradd, Ywhae, Apaf1, Opa1, Clspn, Gas2, Gzme, Gzmf, Gzmg, Pmaip1, Ticam2, Vim, Bcl2l1, Mapt, Casp9, Cdh1, Hmgb1, Stk26, Y…	77
Programmed Cell Death	0.000154126	Aven, Cflar, Dnm1l, Fasl, Hist1h1c, Satb1, Bcl2, Ywhab, Bmx, Pkp1, Appl1, Bcl2l11, Fas, Hmgb2, Ly96, Mapk8, Prkcd, Stk24, Tjp2, Xiap, Bid, Fnta, Gzmd, Ppp3cc, Ppp3r1, Tjp1, Add1, Kpna1, Ubc, Ywhag, Ptk2, Ripk1, Gzmc, Prkcq, Bak1, Kpnb1, Rock1, Birc2, Bmf, Casp3, Ctnnb1, Dsp, Lmnb1, Tradd, Ywhae, Apaf1, Birc3, Opa1, Clspn, Gas2, Gzme, Gzmf, Gzmg, Pmaip1, Ticam2, Vim, Ripk3, Bcl2l1, Mapt, Casp9, Cd…	81
Antigen processing: Ubiquitination & Proteasome degradation	0.000154126	Cul3, Fbxl3, Rnf182, Eloc, Ufl1, Znrf2, Kbtbd13, Dzip3, Lmo7, Rnf7, Ube2d1, Socs1, Ank2, Ankrd12, Fbxl14, Fbxl5, Fbxo30, Hectd2, Hecw2, Herc1, Herc6, Itch, Kbtbd7, Kdm2b, Klhl2, Klhl20, Lrr1, Mex3c, Rbbp6, Rnf111, Rnf138, Rnf4, Rnf41, Sh3rf1, Smurf2, Trim50, Trim69, Ube2b, Ube2h, Ube2o, Ube3c, Wsb1, Cbll1, Gan, Kbtbd8, Klhl13, Npepps, Trim9, Ube2d3, Ube2e2, Anapc1, Birc6, Cdc27, Fbxl20, Fbxo32, F…	160
PI5P, PP2A and IER3 Regulate PI3K/AKT Signaling	0.000154126	Fgf10, Il1rl1, Il33, Ins1, Pdgfra, Pik3r1, Ppp2cb, Rac1, Fgf5, Pip4k2a, Egfr, Esr1, Fgf4, Fgfr1, Fgfr2, Frs2, Il1rap, Insr, Irs1, Mapk1, Pik3cb, Ereg, Fgf8, Gab1, Pdgfa, Ppp2r1a, Ppp2r5e, Strn, Erbb3, Fyn, Erbb4, Cd28, Fgf2, Fgf6, Klb, Cd80, Hbegf, Icos, Pdgfb, Pdgfrb, Pik3r3, Ppp2ca, Pik3ca, Ptpn11, Cd19, Fgf15, Rhog, Traf6, Kitl, Fgf17, Mapk3, Pip4k2b, Pip4k2c, Btc, Cd86, Nrg3, Fgf1, Akt1, Fgf2…	74
MAPK1/MAPK3 signaling	0.000233427	Actb, Cul3, Fgf10, Map2k1, Pdgfra, Ppp2cb, Rap1b, Spred1, Dab2ip, Dusp4, Flt3, Ywhab, Camk2d, Fgf5, Kras, Syngap1, Araf, Dlg2, Dusp10, Dusp16, Egfr, Fgf4, Fgfr1, Fgfr2, Frs2, Il6, Il6st, Irs1, Kbtbd7, Lamtor3, Mapk1, Rasa2, Sptbn1, Ereg, Fgf8, Il17rd, Itga2b, Rap1a, Rapgef2, Spred2, Dusp6, Pdgfa, Ppp2r1a, Ppp2r5e, Ranbp9, Rasal2, Ubc, Vcl, Erbb3, Fyn, Mark3, Braf, Erbb4, Ptk2, Fgf2, Fgf6, Klb, Ty…	132
Signaling by TGF-beta family members	0.000233427	Bmpr1a, E2f5, Tgif1, Skil, Bmpr1b, Ccnc, Nog, Sp1, Ube2d1, Zfyve16, Arhgef18, Bmpr2, Grem2, Rnf111, Smad2, Smad4, Smad7, Smad9, Smurf2, Usp9x, Tgfbr2, Ube2d3, Ccnt2, Mtmr4, Snw1, Ubc, Bmp2, Ccnt1, Trim33, Acvr1c, Acvr2a, Inhba, F11r, Fstl1, Hdac1, Ncor2, Wwtr1, Cdk8, Fkbp1a, Smad5, Tgif2, Cer1, Fst, Men1, Rhoa, Bmp10, Inhbb, Cbl, Smad6, Gdf2, Ube2m, Rbl1, Smad1, Tgfbr1, Rps27a, Smurf1, Acvrl1, Fs…	62
Cytokine Signaling in Immune system	0.00063591	Crk, Hist2h3c1, Ifna13, Il1rl1, Il33, Pik3r1, Ppp2cb, Tnfrsf11b, Creb1, Dusp4, Flt3, Irak2, S100b, Tnfrsf13b, Camk2d, Eif4e, Mapkapk3, P4hb, Sh2b1, Stat4, Stat5b, Tab3, Vamp2, Socs1, Cd70, Cntfr, Eda, Ikbkg, Il1rap, Il21, Il4, Il6, Il6st, Irs1, Lifr, Mapk1, Mapk8, Nfkbia, Osm, Pias1, Pik3cb, Prkcd, Rps6ka3, Snap25, Tab2, Tnfsf15, Tnfsf8, Yes1, Abce1, Dusp3, Fos, Ikbkb, Map3k7, Mapk14, Nkiras2, Pt…	204
Costimulation by the CD28 family	0.000700307	Pik3r1, Ppp2cb, Rac1, Grap2, Ctla4, Mtor, Rictor, Yes1, Btla, Pdpk1, Ppp2r1a, Ppp2r5e, Them4, Cd3e, Fyn, Cd247, Cd28, Cdc42, Akt3, Cd80, Icos, Pik3r3, Ppp2ca, Trib3, Csk, Mapkap1, Pik3ca, Ptpn11, Cd274, Icosl, Pdcd1, Cd86, Lyn, Pdcd1lg2, Akt1, Ppp2r5c, Map3k14, Akt2, Cd4, Grb2, Map3k8, Ppp2r1b, Ppp2r5d, Pak2, Ppp2r5b, Tnfrsf14	46
IRS-related events triggered by IGF1R	0.000700307	Fgf10, Pik3r1, Flt3, Fgf5, Igf2, Fgf4, Fgfr1, Fgfr2, Frs2, Irs1, Pde3b, Pik3cb, Fgf8, Tlr9, Gab1, Pdpk1, Them4, Fgf2, Fgf6, Klb, Flt3l, Igf1, Trib3, Pik3ca, Ptpn11, Sos1, Fgf15, Fgf17, Igf1r, Fgf1, Fgf22, Fgf16, Fgf7, Akt2, Grb2, Fgf9, Irs4, Irs2	38
RAF/MAP kinase cascade	0.000888343	Actb, Cul3, Fgf10, Map2k1, Pdgfra, Ppp2cb, Rap1b, Spred1, Dab2ip, Dusp4, Flt3, Ywhab, Camk2d, Fgf5, Kras, Syngap1, Araf, Dlg2, Dusp10, Dusp16, Egfr, Fgf4, Fgfr1, Fgfr2, Frs2, Irs1, Kbtbd7, Lamtor3, Mapk1, Rasa2, Sptbn1, Ereg, Fgf8, Il17rd, Itga2b, Rap1a, Rapgef2, Spred2, Dusp6, Pdgfa, Ppp2r1a, Ppp2r5e, Ranbp9, Rasal2, Ubc, Vcl, Erbb3, Fyn, Mark3, Braf, Erbb4, Ptk2, Fgf2, Fgf6, Klb, Ncam1, Tln1, C…	126
p75 NTR receptor-mediated signalling	0.000980632	Adam17, Akap13, Arhgef15, Fgd4, Gna13, Kalrn, Rac1, Psen1, Abr, Arhgef6, Arhgef10l, Arhgef11, Arhgef18, Arhgef33, Arhgef7, Bcl2l11, Itsn1, Mapk8, Nfkbia, Prkci, Trio, Ikbkb, Psen2, Sqstm1, Arhgef12, Casp2, Nfkb1, Ubc, Arhgef2, Arhgef26, Arhgef37, Net1, Aph1a, Arhgef10, Casp3, Ywhae, Sos1, Sos2, Tiam2, Arhgef17, Arhgef39, Rhoa, Traf6, Vav3, Arhgef40, Fgd1, Omg, Bad, Rps27a, Rtn4, Arhgef1, Ect2, Ma…	61
RAF-independent MAPK1/3 activation	0.000980632	Map2k1, Dusp4, Dusp10, Dusp16, Il6, Il6st, Mapk1, Dusp6, Tyk2, Cdk1, Dusp2, Jak2, Ptpn11, Dusp9, Mapk3, Dusp5, Dusp7, Dusp8, Il6ra, Dusp1	20
MyD88-independent TLR4 cascade	0.00125201	Ppp2cb, Creb1, Dusp4, Irak2, S100b, Mapkapk3, Tab3, Ube2d1, Ikbkg, Ly96, Mapk1, Mapk8, Nfkbia, Rps6ka3, Tab2, Dusp3, Fos, Ikbkb, Map3k7, Mapk14, Nkiras2, Ube2d3, Dusp6, Nfkb1, Ppp2r1a, Traf3, Ubc, Sarm1, Ripk1, Tab1, Birc2, Map2k6, Mapk10, Ppp2ca, Birc3, Map2k4, Ptpn11, Map2k7, Ticam2, Traf6, Ripk3, Cul1, Mapk11, Mapk3, Nfkbib, Ube2d2a, Hmgb1, Map2k3, Mapk9, Nkiras1, Ube2n, Rps27a, Ikbke, Dusp7, …	65
Downregulated microRNAs
Pathways	p.adjust	Target genes	no of target genes
Signalling by TGF-beta family members	1.10988e-09	Bmpr2, Ccnc, Men1, Pard3, Prkcz, Smad3, Wwtr1, Acvrl1, Cbl, Mtmr4, Smad5, Cer1, Rnf111, Smad9, Trim33, Acvr2b, Chrdl1, Grem2, Nog, Strap, Ube2d1, Zfyve16, Atp1b4, Bmp10, Fst, Inhbb, E2f5, Smad1, Smurf1, Tgfbr2, Usp9x, Acvr2a, Ccnt2, Smurf2, Tfdp1, Fstl1, Tgif2, Ube2d3, Ccnt1, Snw1, Stub1, Zfyve9, Arhgef18, Bmpr1a, Smad2, Smad4, Smad7, Acvr1c, Acvr1b, Bmpr1b, Rbl1, Sp1, Tgfbr1, Cdk8, Fkbp1a, Skil,…	57
Antigen processing: Ubiquitination & Proteasome degradation	8.12382e-07	Fbxo41, Klhl20, Rnf182, Ube2h, Ube2n, Asb8, Cbll1, Itch, Anapc10, Fbxw7, Klhl42, Ltn1, Npepps, Skp2, Ube2v2, Cdc27, Cul3, Fbxl3, Rnf111, Trim36, Ube2e3, Ufl1, Unkl, Fbxo32, Cblb, Dzip3, Fbxo30, Fbxw11, Hectd2, Klhl9, Mex3c, Siah1a, Eloc, Uba3, Uba6, Ube2d1, Ube2w, Ube3a, Ubr1, Wsb1, Ube2g2, Asb1, Asb6, Fbxl7, Fbxo21, Rnf4, Ube2g1, Znrf1, Mgrn1, Anapc7, Cdc34, Cul1, Cul5, Huwe1, Kbtbd8, Klhl21, Rn…	121
Axon guidance	6.14667e-06	Ap2a1, Dpysl5, Efnb2, Efnb3, Frs2, Grin1, Lypla2, St8sia2, Cxcl12, Epha2, Gsk3b, Mmp2, Nrp1, Plxna1, Plxna2, Trio, Col5a1, Dcc, Epha7, Msn, Ntn1, Pik3r3, Sema3a, Vldlr, Col23a1, Dscam, Enah, Ephb2, Gfra2, Kalrn, Ncam1, Ank1, Arhgef7, Col4a3, Creb1, Csnk2a2, Efna1, Egfr, Fyn, Gab1, Nck1, Ngef, Pak3, Pik3ca, Pik3cb, Plcg1, Plxna4, Plxnc1, Prkca, Rac1, Ranbp9, Reln, Rock2, Sema6d, Shc1, Siah1a, Slit…	123
signalling by BMP	6.14667e-06	Bmpr2, Acvrl1, Smad5, Cer1, Smad9, Acvr2b, Chrdl1, Grem2, Nog, Zfyve16, Bmp10, Smad1, Smurf1, Acvr2a, Smurf2, Fstl1, Bmpr1a, Smad4, Smad7, Bmpr1b, Smad6	21
signalling by TGF-beta Receptor Complex	1.46698e-05	Ccnc, Men1, Pard3, Prkcz, Smad3, Wwtr1, Cbl, Mtmr4, Rnf111, Trim33, Strap, Ube2d1, Atp1b4, E2f5, Smurf1, Tgfbr2, Usp9x, Ccnt2, Smurf2, Tfdp1, Tgif2, Ube2d3, Ccnt1, Snw1, Stub1, Zfyve9, Arhgef18, Smad2, Smad4, Smad7, Rbl1, Sp1, Tgfbr1, Cdk8, Fkbp1a, Skil	36
Signalling by Receptor Tyrosine Kinases	1.47231e-05	Ap2a1, Atp6v1g2, Frs2, Itga3, Mknk1, Itch, Nrp1, Pdgfrb, Ppp2r1a, Prkcz, Ptpn1, Spred2, Atp6v1a, Btc, Cbl, Col5a1, Dusp3, Elmo2, Erbb4, Ereg, Kidins220, Pdgfb, Pdgfc, Pdpk1, Pik3r3, Rictor, Abi1, Atp6v1d, Col23a1, Erbin, Fgf5, Nrg3, Pdgfd, Rps6ka3, Spint2, Tec, Tia1, Crkl, Akt3, Arhgef7, Col4a3, Creb1, Egfr, Flt1, Fyn, Gab1, Irs4, Nck1, Ntf3, Ntrk2, Pak3, Pcsk5, Pik3ca, Pik3cb, Plcg1, Ppp2ca, Prk…	173
Negative regulation of the PI3K/AKT network	4.50024e-05	Frs2, Pdgfrb, Ppp2r1a, Ppp2r5c, Btc, Erbb4, Ereg, Pdgfb, Pik3r3, Fgf5, Il1rap, Nrg3, Phlpp2, Akt3, Cd28, Egfr, Fyn, Gab1, Pik3ca, Pik3cb, Pip4k2b, Ppp2ca, Rac1, Strn, Fgf9, Pdgfa, Fgf10, Fgfr2, Fgf6, Fgf7, Pik3ap1, Ptpn11, Phlpp1, Ppp2r1b, Fgfr1, Lck, Esr1, Irs1, Mapk3, Pik3r1, Traf6, Fgf4, Insr, Mapk1, Pdgfra, Irak4, Kitl, Fgf16, Icos, Pik3cd, Tgfa, Grb2, Pip4k2c, Ppp2cb, Pten, Fgf18, Ins2, Hbeg…	59
Clathrin-mediated endocytosis	5.15201e-05	Ap2a1, Chrm2, Cttn, Fcho2, Igf2r, Ldlr, Pacsin1, Ston2, Dab2, Grk3, Btc, Cbl, Ereg, Fzd4, Aak1, Cftr, Ocrl, Picalm, Tor1b, Vamp3, Adrb2, Agfg1, Cltb, Cops2, Cops8, Egfr, Stam2, Syt1, Syt9, Ubqln1, Pacsin2, Rab5b, Sh3gl3, Wnt5a, Arrb1, Cops3, Ldlrap1, Reps2, Tacr1, Itsn1, Arf6, Hip1, Wasl, Actr3, Cops5, Cops7a, Eps15, Sh3kbp1, Ubqln2, Dnajc6, Necap1, Pik3c2a, Sh3gl2, Tfrc, Vamp4, Snap91, Apob, Tgf…	71
Class I MHC mediated antigen processing & presentation	5.51378e-05	Fbxo41, Klhl20, Rnf182, Tap1, Ube2h, Ube2n, Asb8, Cbll1, Itch, Anapc10, Fbxw7, Klhl42, Ltn1, Npepps, Skp2, Ube2v2, Cdc27, Cul3, Fbxl3, Rnf111, Trim36, Ube2e3, Ufl1, Unkl, Vamp3, Fbxo32, Cblb, Dzip3, Erap1, Fbxo30, Fbxw11, Hectd2, Klhl9, Mex3c, Sec23a, Sec24a, Siah1a, Eloc, Uba3, Uba6, Ube2d1, Ube2w, Ube3a, Ubr1, Wsb1, Ube2g2, Asb1, Asb6, Fbxl7, Fbxo21, H2-Q4, H2-T24, Rnf4, Ube2g1, Znrf1, Mgrn1, A…	136
Intracellular signalling by second messengers	7.42862e-05	Frs2, Gatad2b, Sall4, Pdgfrb, Ppp2r1a, Ppp2r5c, Btc, Chd3, Erbb4, Ereg, Lamtor5, Pde1c, Pdgfb, Pdpk1, Pik3r3, Prkar1a, Rictor, Usp13, Fgf5, Frk, Il1rap, Nrg3, Phlpp2, Rbbp7, Adcy9, Akt3, Bmi1, Cbx4, Cd28, Creb1, Csnk2a2, Egfr, Fyn, Gab1, Phc3, Pik3ca, Pik3cb, Pip4k2b, Ppp2ca, Prkca, Rac1, Rnf2, Strn, Suz12, Fgf9, Pdgfa, Tnks2, Fgf10, Fgfr2, Adcy1, Adcy7, Fgf6, Fgf7, Foxo1, Mecom, Mtor, Pik3ap1, P…	100
PI5P, PP2A and IER3 Regulate PI3K/AKT signalling	7.42862e-05	Frs2, Pdgfrb, Ppp2r1a, Ppp2r5c, Btc, Erbb4, Ereg, Pdgfb, Pik3r3, Fgf5, Il1rap, Nrg3, Cd28, Egfr, Fyn, Gab1, Pik3ca, Pik3cb, Pip4k2b, Ppp2ca, Rac1, Strn, Fgf9, Pdgfa, Fgf10, Fgfr2, Fgf6, Fgf7, Pik3ap1, Ptpn11, Ppp2r1b, Fgfr1, Lck, Esr1, Irs1, Mapk3, Pik3r1, Traf6, Fgf4, Insr, Mapk1, Pdgfra, Irak4, Kitl, Fgf16, Icos, Pik3cd, Tgfa, Grb2, Pip4k2c, Ppp2cb, Fgf18, Ins2, Hbegf, Akt1	55
PIP3 activates AKT signalling	7.42862e-05	Frs2, Gatad2b, Sall4, Pdgfrb, Ppp2r1a, Ppp2r5c, Btc, Chd3, Erbb4, Ereg, Lamtor5, Pdgfb, Pdpk1, Pik3r3, Rictor, Usp13, Fgf5, Frk, Il1rap, Nrg3, Phlpp2, Rbbp7, Akt3, Bmi1, Cbx4, Cd28, Creb1, Csnk2a2, Egfr, Fyn, Gab1, Phc3, Pik3ca, Pik3cb, Pip4k2b, Ppp2ca, Rac1, Rnf2, Strn, Suz12, Fgf9, Pdgfa, Tnks2, Fgf10, Fgfr2, Fgf6, Fgf7, Foxo1, Mecom, Mtor, Pik3ap1, Ptpn11, Rnf146, Phlpp1, Ppp2r1b, Fgfr1, Lck, …	90
Cargo recognition for clathrin-mediated endocytosis	7.56684e-05	Ap2a1, Chrm2, Fcho2, Igf2r, Ldlr, Ston2, Dab2, Grk3, Btc, Cbl, Ereg, Fzd4, Aak1, Cftr, Picalm, Tor1b, Vamp3, Adrb2, Cltb, Cops2, Cops8, Egfr, Stam2, Syt1, Syt9, Ubqln1, Sh3gl3, Wnt5a, Arrb1, Cops3, Ldlrap1, Reps2, Tacr1, Itsn1, Cops5, Cops7a, Eps15, Sh3kbp1, Ubqln2, Necap1, Sh3gl2, Tfrc, Vamp4, Snap91, Apob, Tgfa, Grb2, Lrp2, Il7r, Cd4, Cltc, Tgoln1, Hbegf, Epn2	54
Transcriptional activity of SMAD2/SMAD3:SMAD4 heterotrimer	0.000287793	Ccnc, Men1, Smad3, Wwtr1, Rnf111, Trim33, Ube2d1, Atp1b4, E2f5, Usp9x, Ccnt2, Smurf2, Tfdp1, Tgif2, Ube2d3, Ccnt1, Snw1, Smad2, Smad4, Smad7, Rbl1, Sp1, Cdk8, Skil	24
Transcriptional Regulation by TP53	0.000962842	Gatad2b, Ppp1r13b, Usp7, Brd1, Ccna2, E2f8, Ppp2r1a, Ppp2r5c, Eloa, Tnks1bp1, Ywhag, Btg2, Chd3, Lamtor5, Prkaa1, Trp73, Ccne2, Kmt5a, Rbbp7, Zfp420, Akt3, Bnip3l, Casp2, Cdk12, Cnot6, Cnot6l, Cnot7, Cnot9, Csnk2a2, Dyrk2, Hipk1, Jmy, Mdm4, Npm1, Nuak1, Pip4k2b, Plk2, Ppp2ca, Sesn1, Taf3, Taf4, Eloc, Trp53inp1, Ywhab, Cradd, Cnot4, Prkab2, Taf15, Mtor, Taf1, Ccnt2, Ppp2r1b, Polr2h, Brpf3, Ccnt1, …	103
Regulation of TP53 Activity	0.00127733	Gatad2b, Ppp1r13b, Usp7, Brd1, Ccna2, Ppp2r1a, Ppp2r5c, Chd3, Prkaa1, Trp73, Kmt5a, Rbbp7, Akt3, Csnk2a2, Dyrk2, Hipk1, Jmy, Mdm4, Nuak1, Pip4k2b, Ppp2ca, Taf3, Taf4, Trp53inp1, Prkab2, Taf15, Taf1, Ppp2r1b, Brpf3, Cdk5r1, Ep300, Ing5, Phf20, Pml, Stk11, Tbp, Taf4b, Ing2, Prkaa2, Pip4p1, Aurka, Cdk2, Mapk14, Atm, Csnk2a1, Pip4k2c, Pou4f2, Ppp2cb, Prkag2, Trp63, Rffl, Ccng1, Chd4, Prmt5, Taf9b, Zf…	57
Signalling by NTRKs	0.00149334	Ap2a1, Frs2, Ppp2r1a, Dusp3, Kidins220, Rps6ka3, Crkl, Creb1, Fyn, Ntf3, Ntrk2, Pcsk5, Pik3ca, Pik3cb, Plcg1, Ppp2ca, Rac1, Shc1, Bdnf, Ppp2r1b, Dusp6, Irs1, Mapk3, Pik3r1, Crk, Mapk1, Ralgds, Sh3gl2, Mapk14, Rps6ka5, Sos1, Grb2, Ppp2cb, Furin, Mapkapk3, Cltc, Ntrk3	37
Golgi Associated Vesicle Biogenesis	0.00185442	Igf2r, Sort1, Bloc1s4, Cpd, Ocrl, Picalm, Ap1s2, Ap3s1, Ap4e1, Tbc1d8b, Acbd3, Ap1g1, Arf1, Tpd52, Ap3b1, Arrb1, Sh3d19, Ap1b1, Yipf6, Ap1s3, Dnajc6, Necap1, Pik3c2a, Pum1, Sh3gl2, Tfrc, Gak, Cltc, Tgoln1, Rab5c, Snx5	31
Signalling by FGFR3	0.00196055	Frs2, Mknk1, Ppp2r1a, Cbl, Fgf5, Gab1, Pik3ca, Plcg1, Ppp2ca, Shc1, Fgf9, Ptpn11, Braf, Galnt3, Mapk3, Pik3r1, Fgf4, Mapk1, Spry2, Fgf16, Sos1, Grb2, Ppp2cb, Fgf18	24
SMAD2/SMAD3:SMAD4 heterotrimer regulates transcription	0.00202979	Ccnc, Men1, Smad3, Wwtr1, Rnf111, Atp1b4, E2f5, Ccnt2, Tfdp1, Ccnt1, Snw1, Smad2, Smad4, Smad7, Rbl1, Sp1, Cdk8	17

## Sheet: Post status epilepticus
Post SE
Upregulated microRNAs
Pathways	p.adjust	Target genes	no of target genes
Signaling by VEGF	0.00444947	Abi2, Cyfip2, Elmo2, Flt4, Mapkapk2, Ncf1, Nrp1, Pik3ca, Ctnnb1, Mapk14, Nck1, Prkcb, Rock2, Wasf2, Axl, Brk1, Cav1, Ctnnd1, Vegfd, Kras, Nckap1, Pgf, Plcg1, Prr5, Pxn, Rock1, Vegfa, Wasf1, Rictor, Cdh5, Flt1, Rhoa, Src, Vegfc, Cybb, Ncf4, Crk, Mapkapk3, Pak3, Vav3, Elmo1, Mtor, Pik3cb, Pik3r1, Prkca, Prkcd, Jup, Nos3, Nrp2, Fyn, Itgb3, Pdpk1, Cdc42, Ctnna1, Rac1, Rasa1, Vegfb, Itgav, Vav2, Actb,…	64
Signaling by Receptor Tyrosine Kinases	0.00444947	Abi2, Arhgef7, Atp6v1g3, Cyfip2, Elmo2, Fgf1, Fgf4, Fgfr4, Flt4, Frs2, Igf1r, Kitl, Mapkapk2, Ncf1, Nrp1, Pik3ca, Pik3r3, Spry2, Ap2a2, Atp6v1b2, Ctnnb1, Egfr, Eps15, Fn1, Gga3, Irs1, Mapk14, Nck1, Nedd4, Ntrk2, Pde3b, Prkcb, Ralgds, Rock2, Stat3, Wasf2, Ap2s1, Atp6v0a1, Atp6v1f, Axl, Bdnf, Braf, Brk1, Cav1, Col4a4, Col6a1, Col6a2, Crkl, Ctnnd1, Egf, Fgf22, Fgf9, Fgfr1, Vegfd, Flrt2, Grap2, Hnrnp…	211
Intracellular signaling by second messengers	0.00444947	Adcy1, Chd4, Fgf1, Fgf4, Fgfr4, Foxo6, Frs2, Hdac1, Kitl, Pde1c, Pik3ca, Pik3r3, Suz12, Adcy5, Egfr, Irs1, Nedd4, Pip4k2b, Pip4k2c, Adcy7, Casp9, Cbx2, Egf, Fgf22, Fgf9, Fgfr1, Frk, Icos, Il1rl1, Lck, Mta2, Npcd, Pdgfra, Pdgfrb, Pip5k1a, Ppp2r5a, Prex2, Prr5, Rps6kb2, Rragc, Rragd, Scmh1, Slc38a9, Tgfa, Traf6, Trat1, Gab1, Insr, Mapk1, Phc3, Rheb, Rictor, Adcy9, Camkk1, Pip4k2a, Ppp2r1b, Prkar1b,…	121
EPH-Ephrin signaling	0.00444947	Arhgef7, Arpc1a, Efna1, Efna3, Rock2, Efna5, Efnb1, Ephb2, Grin2b, Itsn1, Kalrn, Lyn, Rock1, Epha8, Grin1, Arpc4, Efnb3, Rhoa, Src, Wasl, Efnb2, Git1, Pak3, Vav3, Epha5, Epha4, Epha7, Sdcbp, Yes1, Actr2, Efna4, Fyn, Cdc42, Rac1, Rasa1, Ngef, Efna2, Vav2, Actb, Actg1, Epha1, Ephb1, Nck2	43
Apoptosis	0.00900202	Apaf1, Bcl2, Dffa, Kpna1, Ocln, Ywhag, Ctnnb1, Kpnb1, Plec, Ppp3r1, Tjp2, Ywhab, Acin1, Bid, Casp3, Casp9, Dnm1l, Lmna, Mapt, Oma1, Rock1, Satb1, Tnfsf10, Hist1h1a, Add1, Appl1, Mapk8, Xiap, Bcl2l1, Hmgb2, Ticam2, Vim, Ywhah, Bmx, Pkp1, Clspn, Dcc, Pmaip1, Ripk1, Bcl2l11, Cflar, Fas, Ly96, Prkcd, Cdh1, Hmgb1, Stk26, Tjp1, Hist1h1c, Bad, Birc2, Dsp, Gas2, H1f0, Hist1h1d, Nmt1, Ywhae, Bak1, Bax, Bm…	65
Programmed Cell Death	0.0118079	Apaf1, Bcl2, Dffa, Kpna1, Ocln, Ywhag, Ctnnb1, Kpnb1, Plec, Ppp3r1, Tjp2, Ywhab, Acin1, Bid, Casp3, Casp9, Dnm1l, Lmna, Mapt, Oma1, Rock1, Satb1, Tnfsf10, Hist1h1a, Add1, Appl1, Mapk8, Xiap, Bcl2l1, Hmgb2, Ticam2, Vim, Ywhah, Bmx, Pkp1, Clspn, Dcc, Pmaip1, Ripk1, Bcl2l11, Cflar, Fas, Ly96, Prkcd, Cdh1, Hmgb1, Stk26, Tjp1, Hist1h1c, Bad, Birc2, Dsp, Rps27a, Gas2, H1f0, Hist1h1d, Nmt1, Ripk3, Birc3…	68
EPHA-mediated growth cone collapse	0.0118079	Efna1, Efna3, Efna5, Lyn, Epha8, Rhoa, Src, Epha5, Epha4, Epha7, Yes1, Efna4, Fyn, Ngef, Efna2, Epha1	16
Death Receptor Signalling	0.0118079	Aph1b, Arhgef7, Gna13, Nsmaf, Rbck1, Tab2, Bag4, Net1, Bex3, Rela, Tnfrsf1a, Abr, Aph1a, Arhgef10l, Casp2, Casp3, Itsn1, Kalrn, Otulin, Prkci, Sppl2a, Tnfaip3, Tnfsf10, Traf6, Map3k7, Usp4, Arhgef37, Rhoa, Sqstm1, Nfkb1, Clip4, Mapk8, Xiap, Arhgef16, Arhgef5, Cyld, Arhgef6, Tab3, Ripk1, Vav3, Fgd4, Akap13, Arhgef11, Arhgef18, Arhgef33, Bcl2l11, Cflar, Fas, Ikbkg, Nfkbia, Trio, Omg, Sos2, Bad, Bir…	74
PIP3 activates AKT signaling	0.0145197	Chd4, Fgf1, Fgf4, Fgfr4, Foxo6, Frs2, Hdac1, Kitl, Pik3ca, Pik3r3, Suz12, Egfr, Irs1, Nedd4, Pip4k2b, Pip4k2c, Casp9, Cbx2, Egf, Fgf22, Fgf9, Fgfr1, Frk, Icos, Il1rl1, Lck, Mta2, Npcd, Pdgfra, Pdgfrb, Pip5k1a, Ppp2r5a, Prex2, Prr5, Rps6kb2, Rragc, Rragd, Scmh1, Slc38a9, Tgfa, Traf6, Trat1, Gab1, Insr, Mapk1, Phc3, Rheb, Rictor, Pip4k2a, Ppp2r1b, Src, Ppp2r5d, Ereg, Fgf16, Phlpp1, Xiap, Cd86, Fgf1…	105
VEGFA-VEGFR2 Pathway	0.0257133	Abi2, Cyfip2, Elmo2, Mapkapk2, Ncf1, Pik3ca, Ctnnb1, Mapk14, Nck1, Prkcb, Rock2, Wasf2, Axl, Brk1, Cav1, Ctnnd1, Kras, Nckap1, Plcg1, Prr5, Pxn, Rock1, Vegfa, Wasf1, Rictor, Cdh5, Rhoa, Src, Cybb, Ncf4, Crk, Mapkapk3, Pak3, Vav3, Elmo1, Mtor, Pik3cb, Pik3r1, Prkca, Prkcd, Jup, Nos3, Fyn, Itgb3, Pdpk1, Cdc42, Ctnna1, Rac1, Rasa1, Itgav, Vav2, Actb, Actg1, Mapk11, Nck2, Them4	56
Axon guidance	0.0259233	Arhgef7, Arpc1a, Cxcl12, Dag1, Efna1, Efna3, Enah, Frs2, Gsk3b, Map2k1, Nfasc, Nrp1, Pik3ca, Pik3r3, Rdx, Abl1, Ap2a2, Dpysl2, Egfr, Evl, Mapk14, Nck1, Rap1gap, Rock2, Sptbn2, Tln1, Ap2s1, Cntn2, Col4a4, Col6a1, Col6a2, Dok2, Efna5, Efnb1, Ephb2, Fgfr1, Grin2b, Itsn1, Kalrn, Kras, Lyn, Ntn1, Pdlim7, Plcg1, Plxna2, Reln, Rock1, Rras, Sema4d, Sema6d, Shank3, Sptbn1, Tubb3, Epha8, Gab1, Grin1, Itga5…	138
EPH-ephrin mediated repulsion of cells	0.0342909	Efna1, Efna3, Efna5, Efnb1, Ephb2, Lyn, Epha8, Efnb3, Src, Efnb2, Vav3, Epha5, Epha4, Epha7, Yes1, Efna4, Fyn, Rac1, Efna2, Vav2, Epha1, Ephb1	22
Fcgamma receptor (FCGR) dependent phagocytosis	0.0342931	Abi2, Arpc1a, Cyfip2, Elmo2, Nf2, Pik3ca, Wipf1, Abl1, Myo5a, Nck1, Plpp5, Wasf2, Brk1, Fcgr2b, Lyn, Myh9, Myo1c, Nckap1, Plcg1, Wasf1, Mapk1, Wipf2, Arpc4, Pld3, Src, Wasl, Btk, Crk, Cd247, Plpp4, Vav3, Elmo1, Pik3cb, Pik3r1, Prkcd, Yes1, Actr2, Myo10, Was, Fyn, Cdc42, Pld2, Prkce, Rac1, Syk, Vav2, Actb, Actg1, Nckipsd	49
Retrograde transport at the Trans-Golgi-Network	0.0521823	Cog7, Rab43, Rab6b, Rgp1, Vamp3, Rab6a, Stx16, Usp6nl, Cog1, Scoc, Napb, Arfip2, Golga1, Napg, Plin3, Sys1, Vti1a, Nsf, Stx6, Rhobtb3, Rab9b, Arl1, Vamp4, Vps54, Tgoln1, Igf2r, Vps52, Tmf1, Gcc1	29
Transcriptional regulation by RUNX3	0.0605787	Cbfb, Rbpj, Ctnnb1, Ep300, Maml1, Smad3, Smad4, Kras, Lef1, Notch1, Snw1, Tcf7l1, Maml3, Src, Trp53, Smurf2, Tead1, Kat2b, Hdac4, Tcf7l2, Ccnd1, Rps27a, Tcf7, Maml2, Tead4, Mdm2	26
Antigen processing: Ubiquitination & Proteasome degradation	0.0612455	Asb1, Btbd1, Cdc27, Fbxl5, Fbxo32, Klhl22, Rbck1, Rnf114, Uba1, Uba3, Ube2g2, Ube2o, Ube2w, Ank2, Ankrd12, Birc6, Fbxl18, Fbxw7, Herc1, Klhl9, Lnpep, Nedd4, Ube2l3, Ube4a, Ubr4, Ufl1, Asb14, Asb17, Asb8, Ccnf, Fbxl16, Fbxo10, Fbxo17, Fbxo30, Fbxo41, Fbxo9, Fzr1, Hectd2, Hecw2, Itch, Kctd7, Mex3c, Rnf34, Rnf4, Rnf41, Trim11, Trim36, Trim9, Klhl42, Arel1, Cblb, Fbxl7, Fbxo31, Fbxw9, Lrrc41, Ube2m, …	129
Apoptotic execution phase	0.0650248	Dffa, Kpna1, Ocln, Ctnnb1, Kpnb1, Plec, Tjp2, Acin1, Casp3, Dnm1l, Lmna, Mapt, Rock1, Satb1, Hist1h1a, Add1, Hmgb2, Vim, Bmx, Pkp1, Clspn, Prkcd, Cdh1, Hmgb1, Stk26, Tjp1, Hist1h1c, Birc2, Dsp, Gas2, H1f0, Hist1h1d, Gm21596	33
Protein ubiquitination	0.0657941	Ctr9, Hist1h2be, Prkdc, Rnf152, Uba1, Ube2g2, Ube2w, Birc6, Ube2l3, Usp7, Wac, Hist1h2bg, Hist2h2be, Otulin, Pex5, Rnf40, Rtf1, Rnf181, Bcl10, Cdc73, Pex12, Pex13, Shprh, Hist1h2bj, Ube2d1, Hist1h2bb, Ube2g1, Hltf, Ube2q2, Pex14, Rnf144a, Ube2b, Ube2h, Usp9x, Ube2n, Ube2d2a, Rps27a, Hist1h2bm, Uba6, Ube2v2, Ube2d3, Ube2k, Ube2r2, Ube2t	44
Negative regulation of the PI3K/AKT network	0.0657941	Fgf1, Fgf4, Fgfr4, Frs2, Kitl, Pik3ca, Pik3r3, Egfr, Irs1, Pip4k2b, Pip4k2c, Egf, Fgf22, Fgf9, Fgfr1, Icos, Il1rl1, Lck, Pdgfra, Pdgfrb, Pip5k1a, Ppp2r5a, Tgfa, Traf6, Trat1, Gab1, Insr, Mapk1, Pip4k2a, Ppp2r1b, Src, Ppp2r5d, Ereg, Fgf16, Phlpp1, Cd86, Fgf10, Fgf5, Ppp2cb, Fgfr2, Hbegf, Esr1, Il1rap, Pik3cb, Pik3r1, Btc, Cd28, Erbb4, Nrg3, Phlpp2, Fyn, Rac1, Pik3ap1, Pik3cd, Epgn, Fgf7, Erbb3, Fg…	62
TP53 Regulates Metabolic Genes	0.0657941	Prkab2, Sesn1, Txnrd1, Ywhag, Tsc1, Ywhab, G6pdx, Prkab1, Prkag1, Rragc, Rragd, Sesn3, Slc38a9, Txn1, Prkag2, Rheb, Prkaa2, Ywhah, Ddit4, Gls, Lamtor3, Mtor, Prkaa1, Rragb, Prdx1, Ywhae, Gsr, Lamtor5, Ywhaz	29
Downregulated microRNAs
Pathways	p.adjust	Target genes	no of target genes
Antigen processing: Ubiquitination & Proteasome degradation	0.0998905	Anapc11, Cbll1, Cdc23, Fbxl18, Fbxo41, Rlim, Skp2, Trim11, Ube3a, Asb8, Itch	11
Class I MHC mediated antigen processing & presentation	0.16438	Anapc11, Cbll1, Cdc23, Fbxl18, Fbxo41, Rlim, Skp2, Trim11, Ube3a, Asb8, Itch	11
Signaling by Hippo	0.16438	Amotl1, Lats1, Wwc1	3
Neddylation	0.16438	Dcun1d4, Fbxl18, Fbxo41, Hif3a, Skp2, Wsb2, Asb8, Obsl1, Psmd2	9
Switching of origins to a post-replicative state	0.16438	Anapc11, Ccne2, Cdc23, Skp2	4
